# Supplementary material
Source: MDPI journal article supplement (https://www.mdpi.com/search?q=diversity-08-00021)
Supplement: s001 [file diversity-08-00021-s001.pdf]

# Supplementary Materials: Patterns of Sponge Biodiversity in the Pilbara, Northwestern Australia

Jane Fromont, Muhammad Azmi Abdul Wahab, Oliver Gomez, Merrick Ekins, Monique Grol and John Norman Ashby Hooper

## 1. Materials and Methods

### 1.1. Collation of Sponge Occurrence Data

Data of sponge occurrences were collated from databases of the Western Australian Museum (WAM) and Atlas of Living Australia (ALA) [1]. Pilbara sponge data on ALA had been captured in a northern Australian sponge report [2], but with the WAM data, provides a far more comprehensive dataset, in both geographic and taxonomic composition of sponges. Quality control procedures were undertaken to remove obvious duplicate records and those with insufficient or ambiguous species data. Due to differing naming conventions of OTUs by institutions contributing to the two databases and the lack of resources for physical comparison of all OTU specimens, a maximum error of  $\pm 13.5\%$  total species counts was determined for the dataset, to account for potentially unique (differently named OTUs are unique) or overlapping OTUs (differently named OTUs are the same) (157 potential instances identified out of 1164 total OTUs). The amalgamation of these two databases produced a complete occurrence dataset (presence/absence) of all currently described sponge species and OTUs from the region (see Table S1). The dataset follows the new taxonomic classification proposed by [3] and implemented by [4]. The latter source was used to confirm present validities and taxon authorities for known species names.

The dataset consists of records identified as (1) described (Linnean) species, (2) records with “cf.” in front of species names which indicates the specimens have some characters of a described species but also differences, which require comparisons with type material, and (3) records as “operational taxonomy units” (OTUs) which are considered to be unique species although further assessments are required to establish their taxonomic status. For OTUs only identified to a higher taxonomy (e.g. family or order level), unique identifiers were assigned to allow inclusion of these records in statistical analyses (Table S1). In this study the term ‘species’ includes Linnean species, cf. species, and OTUs unless otherwise stated.

### 1.2. Collection Effort

Data on collection effort were compiled from records of all expeditions and collecting trips associated with the WAM and ALA databases. In addition, all other historic expeditions and records that had reported sponge presences not captured in these databases were electronically summarised and collated (commonly from the 1970s and 1980s; Table S2). Collection effort was summarised in three ways for each bioregion: (1) number of collection days, (2) number of collection stations and (3) area of benthos surveyed based on collecting methods (intertidal walks, SCUBA/snorkel, trawls, epibenthic sled). Regression analyses compared the number of collection stations and sampling days, with number of stations where sponges were found, thus investigating the effects of collection effort on sponge presence for each bioregion.

**Table S1.** Described sponge species (validities and authorities after van Soest et al. 2016), tentatively identified species and OTUs occurring in the Pilbara, as collated from databases from the Western Australian Museum and the Atlas of Living Australia (2015). Sequence of taxa is alphabetic per group, then by Linnean species names, with more exact identifications listed first, then listing morphospecies that have numbers or characters only to distinguish them from others, then morphospecies that are part of collection series (e.g. CERF, EG, GN, NR, SS). Bioregions: NWS–North West Shelf, PIO–Pilbara Offshore, PIN–Pilbara Nearshore, NIN–Ningaloo and NWP–North West Province.

| No. | Class        | Order                    | Family                    | Genus                    | Species                       | Taxon Authority    | NWS | PIO | PIN | NIN | NWP | CWT |
|-----|--------------|--------------------------|---------------------------|--------------------------|-------------------------------|--------------------|-----|-----|-----|-----|-----|-----|
| 1   | Calcarea     | Clathrinida              | Clathrinidae              | <i>Clathrina</i>         | <i>Clathrina primordialis</i> | (Haeckel, 1872)    | 0   | 1   | 0   | 0   | 0   | 0   |
| 2   | Calcarea     | Clathrinida              | Leucettidae               | <i>Leucetta</i>          | <i>Leucetta microraphis</i>   | Haeckel, 1872      | 0   | 0   | 1   | 0   | 0   | 0   |
| 3   | Calcarea     | Clathrinida              | Leucettidae               | <i>Leucetta</i>          | <i>Leucetta?</i> sp.          |                    | 0   | 0   | 0   | 1   | 0   | 0   |
| 4   | Calcarea     | Clathrinida              | Leucettidae               | <i>Pericharax</i>        | <i>Pericharax</i> 58          |                    | 1   | 1   | 1   | 0   | 0   | 0   |
| 5   | Calcarea     | Clathrinida              | Leucettidae               | <i>Pericharax</i>        | <i>Pericharax</i> 1784        |                    | 1   | 0   | 0   | 0   | 0   | 0   |
| 6   | Calcarea     | Calcarea unknown order_1 | Calcarea unknown family_1 | Calcarea unknown genus_1 | Calcarea 1                    |                    | 0   | 0   | 1   | 0   | 0   | 0   |
| 7   | Calcarea     | Calcarea unknown order_1 | Calcarea unknown family_1 | Calcarea unknown genus_1 | Calcarea 2                    |                    | 0   | 0   | 1   | 0   | 0   | 0   |
| 8   | Calcarea     | Calcarea unknown order_1 | Calcarea unknown family_1 | Calcarea unknown genus_1 | Calcarea 5                    |                    | 0   | 0   | 1   | 0   | 0   | 0   |
| 9   | Calcarea     | Calcarea unknown order_1 | Calcarea unknown family_1 | Calcarea unknown genus_1 | Calcarea 6                    |                    | 0   | 0   | 1   | 0   | 0   | 0   |
| 10  | Calcarea     | Calcarea unknown order_1 | Calcarea unknown family_1 | Calcarea unknown genus_1 | Calcarea 7                    |                    | 0   | 0   | 1   | 0   | 0   | 0   |
| 11  | Calcarea     | Calcarea unknown order_1 | Calcarea unknown family_1 | Calcarea unknown genus_1 | Calcarea sp. EG1              |                    | 0   | 0   | 1   | 0   | 0   | 0   |
| 12  | Calcarea     | Calcarea unknown order_1 | Calcarea unknown family_1 | Calcarea unknown genus_1 | Calcarea sp. GN1              |                    | 0   | 0   | 0   | 1   | 0   | 0   |
| 13  | Calcarea     | Calcarea unknown order_1 | Calcarea unknown family_1 | Calcarea unknown genus_1 | Calcarea sp. NR1              |                    | 0   | 0   | 0   | 1   | 0   | 0   |
| 14  | Calcarea     | Calcarea unknown order_1 | Calcarea unknown family_1 | Calcarea unknown genus_1 | Calcarea sp. NR2              |                    | 0   | 0   | 0   | 1   | 0   | 0   |
| 15  | Calcarea     | Calcarea unknown order_1 | Calcarea unknown family_1 | Calcarea unknown genus_1 | Calcarea sp. NR3              |                    | 0   | 0   | 0   | 1   | 0   | 0   |
| 16  | Demospongiae | Agelasida                | Agelasidae                | <i>Agelas</i>            | <i>Agelas</i> sp. SS1         |                    | 0   | 0   | 0   | 1   | 0   | 0   |
| 17  | Demospongiae | Agelasida                | Agelasidae                | <i>Agelas</i>            | <i>Agelas</i> sp. SS2         |                    | 0   | 0   | 0   | 1   | 0   | 0   |
| 18  | Demospongiae | Agelasida                | Agelasidae                | <i>Agelas</i>            | <i>Agelas</i> spp.            |                    | 0   | 1   | 0   | 1   | 0   | 0   |
| 19  | Demospongiae | Agelasida                | Agelasidae                | <i>Agelas</i>            | <i>Agelas axifera</i>         | Duch. & Mich, 1964 | 0   | 1   | 1   | 0   | 0   | 0   |
| 20  | Demospongiae | Agelasida                | Agelasidae                | <i>Agelas</i>            | <i>Agelas clathrodes</i>      | Duch. & Mich, 1964 | 0   | 1   | 0   | 0   | 1   | 0   |

|    |              |            |              |                      |                                       |                        |   |   |   |   |   |   |
|----|--------------|------------|--------------|----------------------|---------------------------------------|------------------------|---|---|---|---|---|---|
| 21 | Demospongiae | Agelasida  | Agelasidae   | <i>Agelas</i>        | <i>Agelas gracilis</i>                | Whitelegge, 1897       | 0 | 0 | 1 | 0 | 0 | 0 |
| 22 | Demospongiae | Agelasida  | Agelasidae   | <i>Agelas</i>        | <i>Agelas</i> cf. sp. 2               |                        | 0 | 1 | 0 | 0 | 0 | 0 |
| 23 | Demospongiae | Agelasida  | Agelasidae   | <i>Amphinomia</i>    | <i>Amphinomia sulphurea</i>           | Hooper, 1991           | 1 | 1 | 1 | 1 | 0 | 0 |
| 24 | Demospongiae | Axinellida | Axinellidae  | <i>Axinella</i>      | <i>Axinella aruensis</i>              | (Hentschel, 1912)      | 1 | 1 | 1 | 0 | 0 | 0 |
| 25 | Demospongiae | Axinellida | Axinellidae  | <i>Axinella</i>      | <i>Axinella aruensis</i> Type II      | (Hentschel, 1912)      | 0 | 1 | 1 | 0 | 0 | 0 |
| 26 | Demospongiae | Axinellida | Axinellidae  | <i>Axinella</i>      | <i>Axinella</i> cf. <i>aruensis</i>   | (Hentschel, 1912)      | 0 | 0 | 1 | 1 | 0 | 1 |
| 27 | Demospongiae | Axinellida | Axinellidae  | <i>Axinella</i>      | <i>Axinella loribellae</i>            | Alvarez & Hooper, 2009 | 0 | 1 | 0 | 0 | 0 | 0 |
| 28 | Demospongiae | Axinellida | Axinellidae  | <i>Axinella</i>      | <i>Axinella</i> cf. <i>loribellae</i> | Alvarez & Hooper, 2009 | 0 | 0 | 0 | 1 | 0 | 0 |
| 29 | Demospongiae | Axinellida | Axinellidae  | <i>Axinella</i>      | <i>Axinella sinoxea</i>               | Alvarez & Hooper, 2009 | 1 | 1 | 0 | 0 | 0 | 0 |
| 30 | Demospongiae | Axinellida | Axinellidae  | <i>Axinella</i>      | <i>Axinella</i> cf. sp. 2             |                        | 0 | 1 | 0 | 0 | 0 | 0 |
| 31 | Demospongiae | Axinellida | Axinellidae  | <i>Axinella</i>      | <i>Axinella</i> sp. 3                 |                        | 0 | 0 | 1 | 0 | 0 | 0 |
| 32 | Demospongiae | Axinellida | Axinellidae  | <i>Axinella</i>      | <i>Axinella</i> sp. 4                 |                        | 0 | 0 | 1 | 0 | 0 | 0 |
| 33 | Demospongiae | Axinellida | Axinellidae  | <i>Axinella</i>      | <i>Axinella</i> sp. 5                 |                        | 0 | 0 | 0 | 1 | 0 | 0 |
| 34 | Demospongiae | Axinellida | Axinellidae  | <i>Axinella</i>      | <i>Axinella</i> 285                   |                        | 1 | 1 | 0 | 0 | 0 | 0 |
| 35 | Demospongiae | Axinellida | Axinellidae  | <i>Axinella</i>      | <i>Axinella</i> 346                   |                        | 0 | 1 | 0 | 0 | 0 | 0 |
| 36 | Demospongiae | Axinellida | Axinellidae  | <i>Axinella</i>      | <i>Axinella</i> 353                   |                        | 0 | 1 | 1 | 0 | 0 | 0 |
| 37 | Demospongiae | Axinellida | Axinellidae  | <i>Axinella</i>      | <i>Axinella</i> 508                   |                        | 0 | 1 | 1 | 0 | 0 | 0 |
| 38 | Demospongiae | Axinellida | Axinellidae  | <i>Axinella</i>      | <i>Axinella</i> 559                   |                        | 1 | 1 | 0 | 0 | 0 | 0 |
| 39 | Demospongiae | Axinellida | Axinellidae  | <i>Axinella</i>      | <i>Axinella</i> 706                   |                        | 0 | 1 | 1 | 0 | 0 | 0 |
| 40 | Demospongiae | Axinellida | Axinellidae  | <i>Axinella</i>      | <i>Axinella</i> 1015                  |                        | 1 | 0 | 0 | 0 | 0 | 0 |
| 41 | Demospongiae | Axinellida | Axinellidae  | <i>Axinella</i>      | <i>Axinella</i> 1016                  |                        | 1 | 0 | 0 | 0 | 0 | 0 |
| 42 | Demospongiae | Axinellida | Axinellidae  | <i>Axinella</i>      | <i>Axinella</i> 1795                  |                        | 0 | 1 | 0 | 0 | 0 | 0 |
| 43 | Demospongiae | Axinellida | Axinellidae  | <i>Axinella</i>      | <i>Axinella</i> cf. AIMS              |                        | 0 | 0 | 0 | 1 | 0 | 0 |
| 44 | Demospongiae | Axinellida | Axinellidae  | <i>Axinella</i>      | <i>Axinella</i> sp. CERF2             |                        | 0 | 0 | 0 | 1 | 0 | 0 |
| 45 | Demospongiae | Axinellida | Axinellidae  | <i>Axinella</i>      | <i>Axinella</i> sp. Ng1               |                        | 0 | 1 | 0 | 0 | 0 | 0 |
| 46 | Demospongiae | Axinellida | Axinellidae  | <i>Axinella</i>      | <i>Axinella</i> sp. Ng3               |                        | 0 | 1 | 0 | 1 | 1 | 1 |
| 47 | Demospongiae | Axinellida | Axinellidae  | <i>Axinella</i>      | <i>Axinella</i> sp. cf. Ng3           |                        | 0 | 0 | 1 | 0 | 0 | 0 |
| 48 | Demospongiae | Axinellida | Axinellidae  | <i>Axinella</i>      | <i>Axinella</i> sp. Ng4               |                        | 0 | 0 | 0 | 1 | 0 | 0 |
| 49 | Demospongiae | Axinellida | Axinellidae  | <i>Axinella</i>      | <i>Axinella</i> sp. Ng6               |                        | 0 | 0 | 0 | 0 | 1 | 0 |
| 50 | Demospongiae | Axinellida | Axinellidae  | <i>Axinella</i>      | <i>Axinella</i> sp. NR1               |                        | 0 | 0 | 0 | 1 | 0 | 0 |
| 51 | Demospongiae | Axinellida | Axinellidae  | <i>Axinella</i>      | <i>Axinella</i> sp. NR2               |                        | 0 | 0 | 0 | 1 | 0 | 0 |
| 52 | Demospongiae | Axinellida | Axinellidae  | <i>Axinella</i>      | <i>Axinella</i> sp. NR3               |                        | 0 | 0 | 0 | 1 | 0 | 0 |
| 53 | Demospongiae | Axinellida | Axinellidae  | <i>Axinella</i>      | <i>Axinella</i> sp. SS1               |                        | 0 | 0 | 0 | 1 | 0 | 0 |
| 54 | Demospongiae | Axinellida | Axinellidae  | <i>Axinella</i>      | <i>Axinella</i> sp. SS2               |                        | 0 | 0 | 1 | 1 | 0 | 0 |
| 55 | Demospongiae | Axinellida | Axinellidae  | <i>Axinella</i>      | <i>Axinella</i> sp. SS3               |                        | 0 | 1 | 0 | 0 | 0 | 0 |
| 56 | Demospongiae | Axinellida | Axinellidae  | <i>Axinella</i>      | <i>Axinella</i> cf. sp. SS5           |                        | 0 | 0 | 1 | 0 | 0 | 0 |
| 57 | Demospongiae | Axinellida | Axinellidae  | <i>Axinella</i>      | <i>Axinella</i> sp. SS9               |                        | 0 | 1 | 0 | 0 | 0 | 0 |
| 58 | Demospongiae | Axinellida | Axinellidae  | <i>Dragmacidon</i>   | <i>Dragmacidon</i> sp. CERF1          |                        | 0 | 0 | 0 | 1 | 0 | 0 |
| 59 | Demospongiae | Axinellida | Axinellidae  | <i>Epipolasis</i>    | <i>Epipolasis</i> 452                 |                        | 0 | 1 | 0 | 0 | 1 | 0 |
| 60 | Demospongiae | Axinellida | Heteroxyidae | <i>Myrmekioderma</i> | <i>Myrmekioderma granulatum</i>       | (Esper, 1794)          | 0 | 1 | 1 | 0 | 0 | 0 |

|     |              |            |              |                      |                                                        |                        |   |   |   |   |   |   |
|-----|--------------|------------|--------------|----------------------|--------------------------------------------------------|------------------------|---|---|---|---|---|---|
| 61  | Demospongiae | Axinellida | Raspailiidae | <i>Aulospongius</i>  | <i>Aulospongius</i> spp.                               |                        | 0 | 0 | 0 | 0 | 1 | 0 |
| 62  | Demospongiae | Axinellida | Raspailiidae | <i>Axechina</i>      | <i>Axechina raspailioides</i>                          | Hentschel, 1912        | 0 | 1 | 0 | 0 | 0 | 0 |
| 63  | Demospongiae | Axinellida | Raspailiidae | <i>Ceratopsion</i>   | <i>Ceratopsion axiferum</i>                            | (Hentschel, 1912)      | 1 | 1 | 1 | 0 | 0 | 0 |
| 64  | Demospongiae | Axinellida | Raspailiidae | <i>Ceratopsion</i>   | <i>Ceratopsion montebelloensis</i>                     | Hooper, 1991           | 0 | 1 | 0 | 0 | 0 | 0 |
| 65  | Demospongiae | Axinellida | Raspailiidae | <i>Ceratopsion</i>   | <i>Ceratopsion</i> cf. <i>montebelloensis</i>          | Hooper, 1991           | 0 | 0 | 0 | 1 | 0 | 0 |
| 66  | Demospongiae | Axinellida | Raspailiidae | <i>Ceratopsion</i>   | <i>Ceratopsion palmatum</i>                            | Hooper, 1991           | 0 | 1 | 0 | 0 | 0 | 0 |
| 67  | Demospongiae | Axinellida | Raspailiidae | <i>Ceratopsion</i>   | <i>Ceratopsion</i> sp. 1                               |                        | 0 | 0 | 1 | 0 | 0 | 0 |
| 68  | Demospongiae | Axinellida | Raspailiidae | <i>Ceratopsion</i>   | <i>Ceratopsion?</i> sp. 2                              |                        | 0 | 1 | 0 | 0 | 0 | 0 |
| 69  | Demospongiae | Axinellida | Raspailiidae | <i>Ceratopsion</i>   | <i>Ceratopsion?</i> sp. 3                              |                        | 0 | 1 | 0 | 0 | 0 | 0 |
| 70  | Demospongiae | Axinellida | Raspailiidae | <i>Ceratopsion</i>   | <i>Ceratopsion</i> sp. SS1                             |                        | 0 | 0 | 0 | 1 | 0 | 0 |
| 71  | Demospongiae | Axinellida | Raspailiidae | <i>Didiscus</i>      | <i>Didiscus</i> sp. SS1                                |                        | 0 | 0 | 0 | 1 | 0 | 0 |
| 72  | Demospongiae | Axinellida | Raspailiidae | <i>Echinodictyum</i> | <i>Echinodictyum asperum</i>                           | Ridley & Dendy, 1886   | 1 | 1 | 1 | 0 | 0 | 0 |
| 73  | Demospongiae | Axinellida | Raspailiidae | <i>Echinodictyum</i> | <i>Echinodictyum cancellatum</i>                       | (Lamarck, 1814)        | 1 | 1 | 1 | 0 | 0 | 0 |
| 74  | Demospongiae | Axinellida | Raspailiidae | <i>Echinodictyum</i> | <i>Echinodictyum</i> cf. <i>cancellatum</i>            | (Lamarck, 1814)        | 0 | 0 | 1 | 0 | 0 | 0 |
| 75  | Demospongiae | Axinellida | Raspailiidae | <i>Echinodictyum</i> | <i>Echinodictyum clathrioides</i>                      | Hentschel, 1911        | 1 | 1 | 1 | 1 | 1 | 0 |
| 76  | Demospongiae | Axinellida | Raspailiidae | <i>Echinodictyum</i> | <i>Echinodictyum</i> cf. <i>clathrioides</i>           | Hentschel, 1911        | 0 | 1 | 0 | 1 | 0 | 0 |
| 77  | Demospongiae | Axinellida | Raspailiidae | <i>Echinodictyum</i> | <i>Echinodictyum conulosum</i>                         | Kieschnick, 1900       | 1 | 1 | 1 | 1 | 0 | 0 |
| 78  | Demospongiae | Axinellida | Raspailiidae | <i>Echinodictyum</i> | <i>Echinodictyum</i> cf. <i>conulosum</i>              | Kieschnick, 1900       | 0 | 1 | 0 | 0 | 1 | 1 |
| 79  | Demospongiae | Axinellida | Raspailiidae | <i>Echinodictyum</i> | <i>Echinodictyum mesenterinum</i>                      | (Lamarck, 1814)        | 1 | 1 | 1 | 0 | 0 | 1 |
| 80  | Demospongiae | Axinellida | Raspailiidae | <i>Echinodictyum</i> | <i>Echinodictyum</i> cf. <i>mesenterinum</i>           | (Lamarck, 1814)        | 0 | 0 | 1 | 0 | 0 | 0 |
| 81  | Demospongiae | Axinellida | Raspailiidae | <i>Echinodictyum</i> | <i>Echinodictyum nidulus</i>                           | Hentschel, 1911        | 0 | 0 | 1 | 0 | 0 | 0 |
| 82  | Demospongiae | Axinellida | Raspailiidae | <i>Echinodictyum</i> | <i>Echinodictyum rugosum</i>                           | Ridley & Dendy, 1886   | 1 | 0 | 0 | 0 | 0 | 0 |
| 83  | Demospongiae | Axinellida | Raspailiidae | <i>Echinodictyum</i> | <i>Echinodictyum</i> sp. SS1                           |                        | 1 | 0 | 0 | 0 | 0 | 0 |
| 84  | Demospongiae | Axinellida | Raspailiidae | <i>Ectyoplasia</i>   | <i>Ectyoplasia frondosa</i>                            | (Von Lendenfeld, 1887) | 0 | 0 | 1 | 0 | 0 | 0 |
| 85  | Demospongiae | Axinellida | Raspailiidae | <i>Ectyoplasia</i>   | <i>Ectyoplasia tabula</i>                              | (Lamarck, 1814)        | 1 | 1 | 1 | 0 | 1 | 0 |
| 86  | Demospongiae | Axinellida | Raspailiidae | <i>Ectyoplasia</i>   | <i>Ectyoplasia vammus</i>                              | Hooper, 1991           | 0 | 1 | 1 | 1 | 1 | 0 |
| 87  | Demospongiae | Axinellida | Raspailiidae | <i>Endectyon</i>     | <i>Endectyon (Endectyon) thurstoni</i>                 | (Dendy, 1887)          | 1 | 1 | 0 | 0 | 0 | 0 |
| 88  | Demospongiae | Axinellida | Raspailiidae | <i>Endectyon</i>     | <i>Endectyon (Endectyon)</i> cf. <i>thurstoni</i>      | (Dendy, 1887)          | 0 | 0 | 1 | 0 | 0 | 0 |
| 89  | Demospongiae | Axinellida | Raspailiidae | <i>Eurypon</i>       | <i>Eurypon</i> sp.                                     |                        | 0 | 0 | 0 | 0 | 1 | 0 |
| 90  | Demospongiae | Axinellida | Raspailiidae | <i>Ptilocaulis</i>   | <i>Ptilocaulis</i> sp. Ng1                             |                        | 0 | 0 | 0 | 1 | 0 | 0 |
| 91  | Demospongiae | Axinellida | Raspailiidae | <i>Raspailia</i>     | <i>Raspailia (Clathriodendron) desmoxyiformis</i>      | Hooper, 1991           | 0 | 1 | 0 | 1 | 1 | 0 |
| 92  | Demospongiae | Axinellida | Raspailiidae | <i>Raspailia</i>     | <i>Raspailia (Clathriodendron) keriontria</i>          | Hooper, 1991           | 0 | 1 | 0 | 0 | 0 | 0 |
| 93  | Demospongiae | Axinellida | Raspailiidae | <i>Raspailia</i>     | <i>Raspailia (Clathriodendron)</i> sp.                 |                        | 0 | 0 | 0 | 1 | 0 | 0 |
| 94  | Demospongiae | Axinellida | Raspailiidae | <i>Raspailia</i>     | <i>Raspailia (Clathriodendron)</i> sp. Ng1             |                        | 0 | 0 | 0 | 1 | 0 | 1 |
| 95  | Demospongiae | Axinellida | Raspailiidae | <i>Raspailia</i>     | <i>Raspailia (Parasyringella)</i> cf. <i>clathrata</i> | Ridley, 1884           | 0 | 1 | 0 | 0 | 0 | 0 |
| 96  | Demospongiae | Axinellida | Raspailiidae | <i>Raspailia</i>     | <i>Raspailia (Parasyringella) elegans</i>              | (V. Lendenfeld, 1887)  | 1 | 0 | 1 | 0 | 0 | 0 |
| 97  | Demospongiae | Axinellida | Raspailiidae | <i>Raspailia</i>     | <i>Raspailia (Parasyringella)</i> sp. Ng1              |                        | 0 | 0 | 0 | 1 | 0 | 0 |
| 98  | Demospongiae | Axinellida | Raspailiidae | <i>Raspailia</i>     | <i>Raspailia (Raspailia) phakellopsis</i>              | Hooper, 1991           | 0 | 0 | 1 | 0 | 0 | 0 |
| 99  | Demospongiae | Axinellida | Raspailiidae | <i>Raspailia</i>     | <i>Raspailia (Raspailia)</i> cf. <i>phakellopsis</i>   | Hooper, 1991           | 0 | 0 | 1 | 0 | 0 | 0 |
| 100 | Demospongiae | Axinellida | Raspailiidae | <i>Raspailia</i>     | <i>Raspailia (Raspailia) vestigifera</i>               | Dendy, 1896            | 0 | 1 | 1 | 1 | 0 | 0 |

|     |              |            |               |                               |                                         |                        |   |   |   |   |   |   |
|-----|--------------|------------|---------------|-------------------------------|-----------------------------------------|------------------------|---|---|---|---|---|---|
| 101 | Demospongiae | Axinellida | Raspailiidae  | <i>Raspailia</i>              | <i>Raspailia (Raspaxilla) compressa</i> | Bergquist, 1970        | 1 | 0 | 0 | 0 | 0 | 0 |
| 102 | Demospongiae | Axinellida | Raspailiidae  | <i>Raspailia</i>              | <i>Raspailia (Raspaxilla) wardi</i>     | Hooper, 1991           | 1 | 0 | 1 | 1 | 0 | 0 |
| 103 | Demospongiae | Axinellida | Raspailiidae  | <i>Raspailia</i>              | <i>Raspailia (Raspaxilla) sp. 1</i>     |                        | 0 | 1 | 0 | 0 | 0 | 0 |
| 104 | Demospongiae | Axinellida | Raspailiidae  | <i>Raspailia</i>              | <i>Raspailia (Raspailia) sp. SS2</i>    |                        | 0 | 1 | 0 | 0 | 0 | 0 |
| 105 | Demospongiae | Axinellida | Raspailiidae  | <i>Raspailia</i>              | <i>Raspailia (Raspailia) sp. SS4</i>    |                        | 0 | 1 | 0 | 0 | 0 | 0 |
| 106 | Demospongiae | Axinellida | Raspailiidae  | <i>Reniochalina</i>           | <i>Reniochalina stalagmitis</i>         | Von Lendenfeld, 1888   | 1 | 1 | 1 | 0 | 0 | 0 |
| 107 | Demospongiae | Axinellida | Raspailiidae  | <i>Reniochalina</i>           | <i>Reniochalina cf. stalagmitis</i>     | Von Lendenfeld, 1888   | 0 | 0 | 1 | 1 | 0 | 0 |
| 108 | Demospongiae | Axinellida | Raspailiidae  | <i>Reniochalina</i>           | <i>Reniochalina sp. 1</i>               |                        | 0 | 1 | 1 | 1 | 0 | 0 |
| 109 | Demospongiae | Axinellida | Raspailiidae  | <i>Reniochalina</i>           | <i>Reniochalina sp. 2</i>               |                        | 0 | 0 | 1 | 0 | 0 | 0 |
| 110 | Demospongiae | Axinellida | Raspailiidae  | <i>Reniochalina</i>           | <i>Reniochalina? sp. 2</i>              |                        | 0 | 0 | 1 | 0 | 0 | 0 |
| 111 | Demospongiae | Axinellida | Raspailiidae  | <i>Reniochalina</i>           | <i>Reniochalina 122</i>                 |                        | 0 | 1 | 0 | 0 | 0 | 0 |
| 112 | Demospongiae | Axinellida | Raspailiidae  | <i>Reniochalina</i>           | <i>Reniochalina 275</i>                 |                        | 0 | 1 | 0 | 0 | 0 | 0 |
| 113 | Demospongiae | Axinellida | Raspailiidae  | <i>Reniochalina</i>           | <i>Reniochalina 315</i>                 |                        | 0 | 1 | 0 | 0 | 0 | 0 |
| 114 | Demospongiae | Axinellida | Raspailiidae  | <i>Reniochalina</i>           | <i>Reniochalina 352</i>                 |                        | 1 | 0 | 0 | 0 | 0 | 0 |
| 115 | Demospongiae | Axinellida | Raspailiidae  | <i>Reniochalina</i>           | <i>Reniochalina 781</i>                 |                        | 0 | 1 | 0 | 0 | 0 | 0 |
| 116 | Demospongiae | Axinellida | Raspailiidae  | <i>Reniochalina</i>           | <i>Reniochalina 1014</i>                |                        | 0 | 0 | 1 | 0 | 0 | 0 |
| 117 | Demospongiae | Axinellida | Raspailiidae  | <i>Sollasella</i>             | <i>Sollasella moretonensis</i>          | Van Soest et al., 2006 | 1 | 0 | 0 | 0 | 0 | 0 |
| 118 | Demospongiae | Axinellida | Raspailiidae  | <i>Thrinacophora</i>          | <i>Thrinacophora cervicornis</i>        | Ridley & Dendy, 1886   | 1 | 1 | 1 | 0 | 0 | 0 |
| 119 | Demospongiae | Axinellida | Raspailiidae  | <i>Thrinacophora</i>          | <i>Thrinacophora sp. 1</i>              |                        | 0 | 0 | 1 | 0 | 0 | 0 |
| 120 | Demospongiae | Axinellida | Raspailiidae  | <i>Triaktrion</i>             | <i>Triaktrion flabelliforme</i>         | Hentschel, 1912        | 1 | 1 | 1 | 0 | 0 | 0 |
| 121 | Demospongiae | Axinellida | Raspailiidae  | Raspailiidae unkn.<br>genus_1 | Raspailiidae sp. 6                      |                        | 0 | 0 | 0 | 0 | 1 | 0 |
| 122 | Demospongiae | Axinellida | Stelligeridae | <i>Higginsia</i>              | <i>Higginsia cf. anfractuosa</i>        | Hooper & Lévi, 1993    | 0 | 0 | 1 | 0 | 0 | 0 |
| 123 | Demospongiae | Axinellida | Stelligeridae | <i>Higginsia</i>              | <i>Higginsia massalis</i>               | Carter, 1885           | 0 | 1 | 0 | 0 | 0 | 0 |
| 124 | Demospongiae | Axinellida | Stelligeridae | <i>Higginsia</i>              | <i>Higginsia cf. massalis</i>           | Carter, 1885           | 0 | 0 | 1 | 0 | 0 | 0 |
| 125 | Demospongiae | Axinellida | Stelligeridae | <i>Higginsia</i>              | <i>Higginsia mixta</i>                  | Hentschel, 1912        | 1 | 0 | 1 | 0 | 0 | 0 |
| 126 | Demospongiae | Axinellida | Stelligeridae | <i>Higginsia</i>              | <i>Higginsia cf. mixta</i>              | Hentschel, 1912        | 0 | 0 | 1 | 0 | 0 | 0 |
| 127 | Demospongiae | Axinellida | Stelligeridae | <i>Higginsia</i>              | <i>Higginsia robusta</i>                | Burton, 1959           | 0 | 1 | 1 | 0 | 0 | 0 |
| 128 | Demospongiae | Axinellida | Stelligeridae | <i>Higginsia</i>              | <i>Higginsia scabra</i>                 | Whitelegge, 1907       | 1 | 1 | 0 | 0 | 0 | 0 |
| 129 | Demospongiae | Axinellida | Stelligeridae | <i>Higginsia</i>              | <i>Higginsia cf. scabra</i>             | Whitelegge, 1907       | 0 | 1 | 1 | 1 | 0 | 0 |
| 130 | Demospongiae | Axinellida | Stelligeridae | <i>Higginsia</i>              | <i>Higginsia sp. EG1</i>                |                        | 0 | 0 | 1 | 0 | 0 | 0 |
| 131 | Demospongiae | Biemnida   | Biemnidae     | <i>Biemna</i>                 | <i>Biemna trirhaphis</i>                | (Topsent, 1897)        | 0 | 0 | 1 | 0 | 0 | 0 |
| 132 | Demospongiae | Biemnida   | Biemnidae     | <i>Biemna</i>                 | <i>Biemna saucia</i>                    | Hooper et al., 1991    | 1 | 0 | 0 | 0 | 0 | 0 |
| 133 | Demospongiae | Biemnida   | Biemnidae     | <i>Biemna</i>                 | <i>Biemna sp. 1</i>                     |                        | 0 | 0 | 1 | 0 | 0 | 0 |
| 134 | Demospongiae | Biemnida   | Biemnidae     | <i>Biemna</i>                 | <i>Biemna sp. 2</i>                     |                        | 0 | 0 | 1 | 0 | 0 | 0 |
| 135 | Demospongiae | Biemnida   | Biemnidae     | <i>Biemna</i>                 | <i>Biemna 296</i>                       |                        | 1 | 1 | 0 | 0 | 0 | 0 |
| 136 | Demospongiae | Biemnida   | Biemnidae     | <i>Biemna</i>                 | <i>Biemna 317</i>                       |                        | 1 | 0 | 0 | 0 | 0 | 0 |
| 137 | Demospongiae | Biemnida   | Biemnidae     | <i>Biemna</i>                 | <i>Biemna 410</i>                       |                        | 1 | 0 | 0 | 0 | 0 | 0 |
| 138 | Demospongiae | Biemnida   | Biemnidae     | <i>Biemna</i>                 | <i>Biemna sp. SS1</i>                   |                        | 0 | 1 | 0 | 1 | 0 | 0 |
| 139 | Demospongiae | Biemnida   | Biemnidae     | <i>Biemna</i>                 | <i>Biemna sp. SS2</i>                   |                        | 0 | 0 | 0 | 1 | 0 | 1 |

|     |              |          |                |                      |                                          |                      |   |   |   |   |   |   |
|-----|--------------|----------|----------------|----------------------|------------------------------------------|----------------------|---|---|---|---|---|---|
| 140 | Demospongiae | Biemnida | Biemnidae      | <i>Biemna</i>        | <i>Biemna</i> spp.                       |                      | 0 | 0 | 0 | 1 | 0 | 0 |
| 141 | Demospongiae | Biemnida | Biemnidae      | <i>Neofibularia</i>  | <i>Neofibularia?</i> sp. 1               |                      | 0 | 0 | 1 | 0 | 0 | 0 |
| 142 | Demospongiae | Biemnida | Biemnidae      | <i>Neofibularia</i>  | <i>Neofibularia</i> sp. EG1              |                      | 0 | 0 | 1 | 0 | 0 | 0 |
| 143 | Demospongiae | Biemnida | Biemnidae      | <i>Sigmaxinella</i>  | <i>Sigmaxinella soelae</i>               | Hooper, 1984         | 1 | 1 | 0 | 1 | 0 | 0 |
| 144 | Demospongiae | Biemnida | Biemnidae      | <i>Sigmaxinella</i>  | <i>Sigmaxinella</i> sp. SS1              |                      | 0 | 1 | 1 | 1 | 1 | 0 |
| 145 | Demospongiae | Biemnida | Biemnidae      | <i>Sigmaxinella</i>  | <i>Sigmaxinella</i> sp. SS2              |                      | 0 | 1 | 0 | 1 | 0 | 0 |
| 146 | Demospongiae | Biemnida | Biemnidae      | <i>Sigmaxinella</i>  | <i>Sigmaxinella</i> sp. SS5              |                      | 0 | 1 | 0 | 1 | 0 | 0 |
| 147 | Demospongiae | Biemnida | Rhabderemiidae | <i>Rhabderemia</i>   | <i>Rhabderemia</i> sp.                   |                      | 0 | 0 | 0 | 0 | 1 | 0 |
| 148 | Demospongiae | Biemnida | Rhabderemiidae | <i>Rhabderemia</i>   | <i>Rhabderemia</i> sp. TB1               |                      | 0 | 0 | 0 | 1 | 0 | 0 |
| 149 | Demospongiae | Bubarida | Bubaridae      | <i>Pararhaphoxya</i> | <i>Pararhaphoxya</i> sp. SS1             |                      | 0 | 0 | 0 | 1 | 0 | 0 |
| 150 | Demospongiae | Bubarida | Bubaridae      | <i>Pararhaphoxya</i> | <i>Pararhaphoxya</i> sp. SS2             |                      | 0 | 0 | 0 | 1 | 0 | 0 |
| 151 | Demospongiae | Bubarida | Bubaridae      | <i>Pararhaphoxya</i> | <i>Pararhaphoxya?</i> sp. SS2            |                      | 0 | 0 | 0 | 1 | 0 | 0 |
| 152 | Demospongiae | Bubarida | Bubaridae      | <i>Pararhaphoxya</i> | <i>Pararhaphoxya?</i> sp. SS3            |                      | 0 | 0 | 0 | 1 | 0 | 0 |
| 153 | Demospongiae | Bubarida | Bubaridae      | <i>Phakellia</i>     | <i>Phakellia carduus</i>                 | (Lamarck, 1814)      | 1 | 1 | 0 | 0 | 0 | 0 |
| 154 | Demospongiae | Bubarida | Bubaridae      | <i>Phakellia</i>     | <i>Phakellia tropicalis</i>              | Alvarez & Hoop, 2009 | 1 | 0 | 0 | 0 | 0 | 0 |
| 155 | Demospongiae | Bubarida | Bubaridae      | <i>Phakellia</i>     | <i>Phakellia?</i> sp. 1                  |                      | 0 | 1 | 0 | 0 | 0 | 0 |
| 156 | Demospongiae | Bubarida | Bubaridae      | <i>Phakellia</i>     | <i>Phakellia</i> 643                     |                      | 1 | 0 | 0 | 0 | 0 | 0 |
| 157 | Demospongiae | Bubarida | Bubaridae      | <i>Phakellia</i>     | <i>Phakellia</i> CERF sp. 3              |                      | 0 | 0 | 0 | 1 | 0 | 0 |
| 158 | Demospongiae | Bubarida | Bubaridae      | <i>Phakellia</i>     | <i>Phakellia</i> sp. Ng1                 |                      | 0 | 0 | 0 | 1 | 0 | 0 |
| 159 | Demospongiae | Bubarida | Bubaridae      | <i>Phakellia</i>     | <i>Phakellia</i> sp. Ng2                 |                      | 0 | 1 | 0 | 1 | 0 | 0 |
| 160 | Demospongiae | Bubarida | Bubaridae      | <i>Phakellia</i>     | <i>Phakellia</i> sp. Ng3                 |                      | 0 | 1 | 0 | 1 | 0 | 0 |
| 161 | Demospongiae | Bubarida | Bubaridae      | <i>Phakellia</i>     | <i>Phakellia</i> sp. Ng4                 |                      | 0 | 0 | 0 | 1 | 0 | 0 |
| 162 | Demospongiae | Bubarida | Bubaridae      | <i>Phakellia</i>     | <i>Phakellia</i> sp. Ng5                 |                      | 0 | 0 | 0 | 1 | 0 | 0 |
| 163 | Demospongiae | Bubarida | Bubaridae      | <i>Phakellia</i>     | <i>Phakellia</i> sp. Ng6                 |                      | 0 | 1 | 0 | 1 | 0 | 0 |
| 164 | Demospongiae | Bubarida | Bubaridae      | <i>Phakellia</i>     | <i>Phakellia</i> sp. Ng7                 |                      | 0 | 0 | 0 | 1 | 0 | 0 |
| 165 | Demospongiae | Bubarida | Bubaridae      | <i>Phakellia</i>     | <i>Phakellia</i> sp. Ng8                 |                      | 0 | 0 | 0 | 1 | 0 | 0 |
| 166 | Demospongiae | Bubarida | Bubaridae      | <i>Phakellia</i>     | <i>Phakellia</i> sp. SS1                 |                      | 0 | 0 | 0 | 1 | 0 | 0 |
| 167 | Demospongiae | Bubarida | Bubaridae      | <i>Phycopsis</i>     | <i>Phycopsis</i> 646                     |                      | 0 | 1 | 0 | 0 | 0 | 0 |
| 168 | Demospongiae | Bubarida | Bubaridae      | <i>Pipestela</i>     | <i>Pipestela occidentalis</i>            | Alvarez et al., 2008 | 0 | 1 | 0 | 0 | 0 | 0 |
| 169 | Demospongiae | Bubarida | Bubaridae      | <i>Pipestela</i>     | <i>Pipestela</i> sp. CERF1               |                      | 0 | 0 | 0 | 1 | 0 | 0 |
| 170 | Demospongiae | Bubarida | Bubaridae      | <i>Pipestela</i>     | <i>Pipestela</i> sp. Ng1                 |                      | 0 | 0 | 0 | 1 | 0 | 0 |
| 171 | Demospongiae | Bubarida | Desmanthidae   | <i>Desmanthus</i>    | <i>Desmanthus</i> sp. 1                  |                      | 0 | 0 | 0 | 1 | 0 | 0 |
| 172 | Demospongiae | Bubarida | Dictyonellidae | <i>Acanthella</i>    | <i>Acanthella</i> sp. SS2                |                      | 0 | 1 | 1 | 0 | 0 | 0 |
| 173 | Demospongiae | Bubarida | Dictyonellidae | <i>Acanthella</i>    | <i>Acanthella cavernosa</i>              | Dendy, 1922          | 1 | 1 | 1 | 1 | 1 | 0 |
| 174 | Demospongiae | Bubarida | Dictyonellidae | <i>Acanthella</i>    | <i>Acanthella</i> cf. <i>cavernosa</i>   |                      | 0 | 1 | 0 | 1 | 0 | 0 |
| 175 | Demospongiae | Bubarida | Dictyonellidae | <i>Acanthella</i>    | <i>Acanthella dendyi</i>                 | (Bergquist, 1970)    | 1 | 1 | 0 | 0 | 0 | 0 |
| 176 | Demospongiae | Bubarida | Dictyonellidae | <i>Acanthella</i>    | <i>Acanthella pulcherrima</i>            | Ridley & Dendy, 1886 | 0 | 0 | 0 | 1 | 1 | 0 |
| 177 | Demospongiae | Bubarida | Dictyonellidae | <i>Acanthella</i>    | <i>Acanthella</i> cf. <i>pulcherrima</i> | Ridley & Dendy, 1886 | 0 | 1 | 1 | 1 | 0 | 0 |
| 178 | Demospongiae | Bubarida | Dictyonellidae | <i>Axinyssa</i>      | <i>Axinyssa</i> cf. <i>bergquistae</i>   | Hooper et al., 1997  | 0 | 1 | 1 | 0 | 0 | 0 |

|     |              |              |                |                       |                                        |                            |   |   |   |   |   |   |
|-----|--------------|--------------|----------------|-----------------------|----------------------------------------|----------------------------|---|---|---|---|---|---|
| 179 | Demospongiae | Bubarida     | Dictyonellidae | <i>Cymbastela</i>     | <i>Cymbastela cf. marshae</i>          | Hooper & Bergquist, 1992   | 0 | 0 | 1 | 0 | 0 | 0 |
| 180 | Demospongiae | Bubarida     | Dictyonellidae | <i>Cymbastela</i>     | <i>Cymbastela stipitata</i>            | (Bergquist & Tizard, 1967) | 0 | 0 | 1 | 0 | 0 | 0 |
| 181 | Demospongiae | Bubarida     | Dictyonellidae | <i>Cymbastela</i>     | <i>Cymbastela vespertina</i>           | Hooper & Bergquist, 1992   | 0 | 1 | 1 | 0 | 1 | 0 |
| 182 | Demospongiae | Bubarida     | Dictyonellidae | <i>Cymbastela</i>     | <i>Cymbastela</i> sp. CERF1            |                            | 0 | 0 | 0 | 1 | 0 | 0 |
| 183 | Demospongiae | Bubarida     | Dictyonellidae | <i>Cymbastela</i>     | <i>Cymbastela</i> spp.                 |                            | 0 | 0 | 1 | 1 | 0 | 0 |
| 184 | Demospongiae | Bubarida     | Dictyonellidae | <i>Dictyonella</i>    | <i>Dictyonella cf. chlorophyllacea</i> | Alvarez & Hooper, 2010     | 0 | 0 | 1 | 0 | 0 | 0 |
| 185 | Demospongiae | Bubarida     | Dictyonellidae | <i>Phakettia</i>      | <i>Phakettia euctimena</i>             | (Hentschel, 1912)          | 1 | 0 | 1 | 0 | 0 | 0 |
| 186 | Demospongiae | Bubarida     | Dictyonellidae | <i>Phakettia</i>      | <i>Phakettia</i> 129                   |                            | 0 | 1 | 0 | 0 | 0 | 0 |
| 187 | Demospongiae | Bubarida     | Dictyonellidae | <i>Phakettia</i>      | <i>Phakettia</i> sp. CERF1             |                            | 0 | 0 | 0 | 1 | 0 | 0 |
| 188 | Demospongiae | Bubarida     | Dictyonellidae | <i>Rhaphoxya</i>      | <i>Rhaphoxya? cf. cactiformis</i>      | (Carter, 1885)             | 0 | 0 | 1 | 0 | 0 | 0 |
| 189 | Demospongiae | Bubarida     | Dictyonellidae | <i>Rhaphoxya</i>      | <i>Rhaphoxya</i> sp. 1                 |                            | 0 | 0 | 1 | 0 | 0 | 0 |
| 190 | Demospongiae | Bubarida     | Dictyonellidae | <i>Rhaphoxya</i>      | <i>Rhaphoxya</i> 707                   |                            | 0 | 1 | 0 | 0 | 0 | 0 |
| 191 | Demospongiae | Bubarida     | Dictyonellidae | <i>Rhaphoxya</i>      | <i>Rhaphoxya</i> 712                   |                            | 0 | 1 | 0 | 0 | 0 | 0 |
| 192 | Demospongiae | Bubarida     | Dictyonellidae | <i>Rhaphoxya</i>      | <i>Rhaphoxya</i> sp. CERF1             |                            | 0 | 0 | 0 | 1 | 0 | 0 |
| 193 | Demospongiae | Chondrillida | Chondrillidae  | <i>Chondrilla</i>     | <i>Chondrilla australiensis</i>        | Carter, 1873               | 0 | 0 | 1 | 1 | 0 | 0 |
| 194 | Demospongiae | Chondrillida | Chondrillidae  | <i>Chondrilla</i>     | <i>Chondrilla</i> sp. 1                |                            | 0 | 0 | 1 | 1 | 0 | 0 |
| 195 | Demospongiae | Chondrillida | Chondrillidae  | <i>Chondrilla</i>     | <i>Chondrilla</i> sp. 2                |                            | 0 | 0 | 1 | 0 | 0 | 0 |
| 196 | Demospongiae | Chondrillida | Chondrillidae  | <i>Chondrilla</i>     | <i>Chondrilla</i> sp.                  |                            | 0 | 0 | 0 | 1 | 0 | 0 |
| 197 | Demospongiae | Chondrillida | Chondrillidae  | <i>Chondrosia</i>     | <i>Chondrosia? sp. 2</i>               |                            | 0 | 0 | 0 | 0 | 1 | 0 |
| 198 | Demospongiae | Chondrillida | Halisarcidae   | <i>Halisarca</i>      | <i>Halisarca</i> 1793                  |                            | 0 | 1 | 0 | 0 | 0 | 0 |
| 199 | Demospongiae | Chondrillida | Halisarcidae   | <i>Halisarca</i>      | <i>Halisarca</i> 1805                  |                            | 1 | 0 | 0 | 0 | 0 | 0 |
| 200 | Demospongiae | Clionaida    | Clionaidae     | <i>Cliona</i>         | <i>Cliona dissimilis</i>               | Ridley & Dendy, 1886       | 0 | 1 | 1 | 0 | 0 | 0 |
| 201 | Demospongiae | Clionaida    | Clionaidae     | <i>Cliona</i>         | <i>Cliona orientalis</i>               | Thiele, 1900               | 0 | 1 | 1 | 0 | 0 | 0 |
| 202 | Demospongiae | Clionaida    | Clionaidae     | <i>Cliona</i>         | <i>Cliona cf. orientalis</i>           | Thiele, 1900               | 0 | 0 | 0 | 1 | 0 | 0 |
| 203 | Demospongiae | Clionaida    | Clionaidae     | <i>Cliona</i>         | <i>Cliona patera</i>                   | (Hardwicke, 1820)          | 1 | 1 | 0 | 0 | 0 | 0 |
| 204 | Demospongiae | Clionaida    | Clionaidae     | <i>Cliona</i>         | <i>Cliona</i> 76                       |                            | 0 | 1 | 0 | 0 | 0 | 0 |
| 205 | Demospongiae | Clionaida    | Clionaidae     | <i>Cliona</i>         | <i>Cliona</i> 622                      |                            | 0 | 1 | 0 | 0 | 0 | 0 |
| 206 | Demospongiae | Clionaida    | Clionaidae     | <i>Cliona</i>         | <i>Cliona</i> sp. NR1                  |                            | 0 | 0 | 0 | 1 | 0 | 0 |
| 207 | Demospongiae | Clionaida    | Clionaidae     | <i>Cliona</i>         | <i>Cliona</i> sp. NR2                  |                            | 0 | 0 | 0 | 1 | 0 | 0 |
| 208 | Demospongiae | Clionaida    | Clionaidae     | <i>Pione</i>          | <i>Pione velans</i>                    | (Hentschel, 1909)          | 0 | 1 | 1 | 1 | 0 | 0 |
| 209 | Demospongiae | Clionaida    | Clionaidae     | <i>Spheciospongia</i> | <i>Spheciospongia cf. inconstans</i>   | (Dendy, 1887)              | 0 | 0 | 1 | 0 | 0 | 0 |
| 210 | Demospongiae | Clionaida    | Clionaidae     | <i>Spheciospongia</i> | <i>Spheciospongia montiformis</i>      | (Hallmann, 1912)           | 0 | 1 | 0 | 0 | 0 | 0 |
| 211 | Demospongiae | Clionaida    | Clionaidae     | <i>Spheciospongia</i> | <i>Spheciospongia papillosa</i>        | (Ridley & Dendy, 1886)     | 0 | 0 | 1 | 0 | 0 | 0 |
| 212 | Demospongiae | Clionaida    | Clionaidae     | <i>Spheciospongia</i> | <i>Spheciospongia cf. papillosa</i>    | (Ridley & Dendy, 1886)     | 0 | 0 | 0 | 1 | 0 | 0 |
| 213 | Demospongiae | Clionaida    | Clionaidae     | <i>Spheciospongia</i> | <i>Spheciospongia solida</i>           | (Ridley & Dendy, 1886)     | 0 | 1 | 0 | 0 | 0 | 0 |
| 214 | Demospongiae | Clionaida    | Clionaidae     | <i>Spheciospongia</i> | <i>Spheciospongia vagabunda</i>        | (Ridley, 1884)             | 1 | 1 | 1 | 0 | 0 | 0 |
| 215 | Demospongiae | Clionaida    | Clionaidae     | <i>Spheciospongia</i> | <i>Spheciospongia cf. vagabunda</i>    | (Ridley, 1884)             | 0 | 0 | 1 | 0 | 0 | 0 |

|     |              |                |                    |                         |                                                        |                           |   |   |   |   |   |   |
|-----|--------------|----------------|--------------------|-------------------------|--------------------------------------------------------|---------------------------|---|---|---|---|---|---|
| 216 | Demospongiae | Clionaida      | Clionaidae         | <i>Sphēciospongia</i>   | <i>Sphēciospongia</i> sp. 3                            |                           | 0 | 0 | 1 | 0 | 0 | 0 |
| 217 | Demospongiae | Clionaida      | Clionaidae         | <i>Sphēciospongia</i>   | <i>Sphēciospongia</i> sp. MF1                          |                           | 0 | 0 | 0 | 1 | 0 | 0 |
| 218 | Demospongiae | Clionaida      | Clionaidae         | <i>Sphēciospongia</i>   | <i>Sphēciospongia</i> sp. Pilb1                        |                           | 0 | 0 | 1 | 0 | 0 | 0 |
| 219 | Demospongiae | Clionaida      | Clionaidae         | <i>Sphēciospongia</i>   | <i>Sphēciospongia</i> sp. Pilb2                        |                           | 0 | 0 | 1 | 0 | 0 | 0 |
| 220 | Demospongiae | Clionaida      | Placospongiidae    | <i>Placospongia</i>     | <i>Placospongia</i> cf. <i>melobesioides</i>           | Gray, 1867                | 0 | 0 | 0 | 1 | 0 | 0 |
| 221 | Demospongiae | Clionaida      | Placospongiidae    | <i>Placospongia</i>     | <i>Placospongia</i> 347                                |                           | 1 | 0 | 0 | 0 | 0 | 0 |
| 222 | Demospongiae | Clionaida      | Placospongiidae    | <i>Placospongia</i>     | <i>Placospongia</i> sp. QM1                            |                           | 0 | 1 | 0 | 0 | 0 | 0 |
| 223 | Demospongiae | Clionaida      | Spirastrellidae    | <i>Spirastrella</i>     | <i>Spirastrella</i> <i>decumbens</i>                   | Ridley, 1884              | 0 | 0 | 0 | 0 | 1 | 0 |
| 224 | Demospongiae | Clionaida      | Spirastrellidae    | <i>Spirastrella</i>     | <i>Spirastrella</i> cf. <i>decumbens</i>               | Ridley, 1884              | 0 | 0 | 1 | 0 | 0 | 0 |
| 225 | Demospongiae | Clionaida      | Spirastrellidae    | <i>Spirastrella</i>     | <i>Spirastrella</i> sp. 2                              |                           | 0 | 0 | 1 | 0 | 0 | 0 |
| 226 | Demospongiae | Clionaida      | Spirastrellidae    | <i>Spirastrella</i>     | <i>Spirastrella</i> sp. 3                              |                           | 0 | 0 | 1 | 0 | 0 | 0 |
| 227 | Demospongiae | Clionaida      | Spirastrellidae    | <i>Spirastrella</i>     | <i>Spirastrella</i> sp. 4                              |                           | 0 | 0 | 1 | 0 | 0 | 0 |
| 228 | Demospongiae | Clionaida      | Spirastrellidae    | <i>Spirastrella</i>     | <i>Spirastrella</i> cf. sp. 4                          |                           | 0 | 0 | 1 | 0 | 0 | 0 |
| 229 | Demospongiae | Clionaida      | Spirastrellidae    | <i>Spirastrella</i>     | <i>Spirastrella</i> sp. 6                              |                           | 0 | 1 | 0 | 0 | 0 | 0 |
| 230 | Demospongiae | Clionaida      | Spirastrellidae    | <i>Spirastrella</i>     | <i>Spirastrella</i> 150                                |                           | 1 | 1 | 0 | 0 | 0 | 0 |
| 231 | Demospongiae | Clionaida      | Spirastrellidae    | <i>Spirastrella</i>     | <i>Spirastrella</i> 306                                |                           | 1 | 1 | 0 | 0 | 0 | 0 |
| 232 | Demospongiae | Clionaida      | Spirastrellidae    | <i>Spirastrella</i>     | <i>Spirastrella</i> 1797                               |                           | 1 | 1 | 0 | 0 | 0 | 0 |
| 233 | Demospongiae | Clionaida      | Spirastrellidae    | <i>Spirastrella</i>     | <i>Spirastrella</i> 1803                               |                           | 1 | 0 | 0 | 0 | 0 | 0 |
| 234 | Demospongiae | Clionaida      | Spirastrellidae    | <i>Spirastrella</i>     | <i>Spirastrella</i> sp. NR1                            |                           | 0 | 0 | 0 | 1 | 0 | 0 |
| 235 | Demospongiae | Clionaida      | Spirastrellidae    | <i>Spirastrella</i>     | <i>Spirastrella</i> sp. NR2                            |                           | 0 | 0 | 0 | 1 | 0 | 0 |
| 236 | Demospongiae | Clionaida      | Spirastrellidae    | <i>Spirastrella</i>     | <i>Spirastrella</i> sp. NR3                            |                           | 0 | 0 | 0 | 1 | 0 | 0 |
| 237 | Demospongiae | Clionaida      | Spirastrellidae    | <i>Spirastrella</i>     | <i>Spirastrella</i> sp. TB1                            |                           | 0 | 0 | 0 | 1 | 0 | 0 |
| 238 | Demospongiae | Dendroceratida | Darwinellidae      | <i>Aplysilla</i>        | <i>Aplysilla</i> sp. 1                                 |                           | 0 | 0 | 1 | 0 | 0 | 0 |
| 239 | Demospongiae | Dendroceratida | Darwinellidae      | <i>Chelonaplysilla</i>  | <i>Chelonaplysilla</i> cf. <i>aurea</i>                | Bergquist, 1995           | 0 | 0 | 1 | 0 | 0 | 0 |
| 240 | Demospongiae | Dendroceratida | Darwinellidae      | <i>Chelonaplysilla</i>  | <i>Chelonaplysilla</i> sp.                             |                           | 0 | 0 | 0 | 1 | 0 | 0 |
| 241 | Demospongiae | Dendroceratida | Darwinellidae      | <i>Dendrilla</i>        | <i>Dendrilla</i> sp. EG1                               |                           | 0 | 0 | 1 | 0 | 0 | 0 |
| 242 | Demospongiae | Dendroceratida | Darwinellidae      | <i>Dendrilla</i>        | <i>Dendrilla</i> sp.                                   |                           | 0 | 0 | 0 | 1 | 0 | 0 |
| 243 | Demospongiae | Dendroceratida | Dictyodendrillidae | <i>Acanthodendrilla</i> | <i>Acanthodendrilla</i> sp. Ng1                        |                           | 0 | 0 | 0 | 1 | 0 | 0 |
| 244 | Demospongiae | Dendroceratida | Dictyodendrillidae | <i>Dictyodendrilla</i>  | <i>Dictyodendrilla</i> sp. 1                           |                           | 0 | 0 | 1 | 0 | 0 | 0 |
| 245 | Demospongiae | Dendroceratida | Dictyodendrillidae | <i>Dictyodendrilla</i>  | <i>Dictyodendrilla</i> 362                             |                           | 1 | 0 | 0 | 0 | 0 | 0 |
| 246 | Demospongiae | Dictyoceratida | Dysideidae         | <i>Dysidea</i>          | <i>Dysidea</i> <i>arenaria</i>                         | Bergquist, 1965           | 0 | 1 | 0 | 0 | 0 | 0 |
| 247 | Demospongiae | Dictyoceratida | Dysideidae         | <i>Dysidea</i>          | <i>Dysidea</i> 229, cf. <i>Dysidea</i> <i>arenaria</i> | Bergquist, 1965           | 1 | 0 | 0 | 0 | 0 | 0 |
| 248 | Demospongiae | Dictyoceratida | Dysideidae         | <i>Dysidea</i>          | <i>Dysidea</i> <i>dakini</i>                           | (Dendy & Frederick, 1924) | 0 | 1 | 0 | 0 | 0 | 0 |
| 249 | Demospongiae | Dictyoceratida | Dysideidae         | <i>Dysidea</i>          | <i>Dysidea</i> sp. 1                                   |                           | 0 | 0 | 1 | 0 | 0 | 0 |
| 250 | Demospongiae | Dictyoceratida | Dysideidae         | <i>Dysidea</i>          | <i>Dysidea</i> sp. 2                                   |                           | 0 | 0 | 1 | 0 | 0 | 0 |
| 251 | Demospongiae | Dictyoceratida | Dysideidae         | <i>Dysidea</i>          | <i>Dysidea</i> sp. 3                                   |                           | 0 | 0 | 1 | 0 | 0 | 0 |
| 252 | Demospongiae | Dictyoceratida | Dysideidae         | <i>Dysidea</i>          | <i>Dysidea</i> sp. 4                                   |                           | 0 | 0 | 1 | 0 | 0 | 0 |
| 253 | Demospongiae | Dictyoceratida | Dysideidae         | <i>Dysidea</i>          | <i>Dysidea</i> sp. 5                                   |                           | 0 | 0 | 1 | 0 | 0 | 0 |
| 254 | Demospongiae | Dictyoceratida | Dysideidae         | <i>Dysidea</i>          | <i>Dysidea</i> 132                                     |                           | 0 | 1 | 0 | 0 | 0 | 0 |



|     |              |                |            |                       |                                           |                   |   |   |   |   |   |   |
|-----|--------------|----------------|------------|-----------------------|-------------------------------------------|-------------------|---|---|---|---|---|---|
| 255 | Demospongiae | Dictyoceratida | Dysideidae | <i>Dysidea</i>        | <i>Dysidea</i> 169                        |                   | 0 | 1 | 0 | 0 | 0 | 0 |
| 256 | Demospongiae | Dictyoceratida | Dysideidae | <i>Dysidea</i>        | <i>Dysidea</i> sp. NR1                    |                   | 0 | 0 | 0 | 1 | 0 | 0 |
| 257 | Demospongiae | Dictyoceratida | Dysideidae | <i>Dysidea</i>        | <i>Dysidea</i> sp. NR2                    |                   | 0 | 0 | 0 | 1 | 0 | 0 |
| 258 | Demospongiae | Dictyoceratida | Dysideidae | <i>Dysidea</i>        | <i>Dysidea</i> sp. QM5                    |                   | 0 | 0 | 0 | 0 | 1 | 0 |
| 259 | Demospongiae | Dictyoceratida | Dysideidae | <i>Dysidea</i>        | <i>Dysidea</i> sp. QM6                    |                   | 0 | 1 | 0 | 0 | 0 | 0 |
| 260 | Demospongiae | Dictyoceratida | Dysideidae | <i>Lamellodysidea</i> | <i>Lamellodysidea</i> cf. <i>herbacea</i> | (Keller, 1889)    | 0 | 0 | 1 | 0 | 0 | 0 |
| 261 | Demospongiae | Dictyoceratida | Dysideidae | <i>Euryspongia</i>    | <i>Euryspongia</i> sp. 2                  |                   | 0 | 0 | 1 | 0 | 0 | 0 |
| 262 | Demospongiae | Dictyoceratida | Dysideidae | <i>Pleraplysilla</i>  | <i>Pleraplysilla</i> 587                  |                   | 1 | 0 | 0 | 0 | 0 | 0 |
| 263 | Demospongiae | Dictyoceratida | Dysideidae | <i>Pleraplysilla</i>  | <i>Pleraplysilla</i> 1781                 |                   | 1 | 0 | 0 | 0 | 0 | 0 |
| 264 | Demospongiae | Dictyoceratida | Irciniidae | <i>Ircinia</i>        | <i>Ircinia irregularis</i>                | (Poléjaeff, 1884) | 0 | 0 | 1 | 0 | 0 | 0 |
| 265 | Demospongiae | Dictyoceratida | Irciniidae | <i>Ircinia</i>        | <i>Ircinia ramodigitata</i>               | (Burton, 1934)    | 1 | 0 | 0 | 0 | 0 | 0 |
| 266 | Demospongiae | Dictyoceratida | Irciniidae | <i>Ircinia</i>        | <i>Ircinia spiculosa</i>                  | (Hentschel, 1912) | 0 | 0 | 1 | 0 | 0 | 0 |
| 267 | Demospongiae | Dictyoceratida | Irciniidae | <i>Ircinia</i>        | <i>Ircinia wistari</i>                    | Wilkinson, 1978   | 0 | 1 | 0 | 0 | 0 | 0 |
| 268 | Demospongiae | Dictyoceratida | Irciniidae | <i>Ircinia</i>        | <i>Ircinia</i> 1                          |                   | 1 | 1 | 0 | 0 | 0 | 0 |
| 269 | Demospongiae | Dictyoceratida | Irciniidae | <i>Ircinia</i>        | <i>Ircinia</i> sp. 1                      |                   | 0 | 1 | 1 | 0 | 0 | 0 |
| 270 | Demospongiae | Dictyoceratida | Irciniidae | <i>Ircinia</i>        | <i>Ircinia</i> sp. 2                      |                   | 0 | 1 | 0 | 0 | 0 | 0 |
| 271 | Demospongiae | Dictyoceratida | Irciniidae | <i>Ircinia</i>        | <i>Ircinia</i> 1228                       |                   | 1 | 1 | 0 | 0 | 0 | 0 |
| 272 | Demospongiae | Dictyoceratida | Irciniidae | <i>Ircinia</i>        | <i>Ircinia</i> 1244                       |                   | 1 | 0 | 0 | 0 | 0 | 0 |
| 273 | Demospongiae | Dictyoceratida | Irciniidae | <i>Ircinia</i>        | <i>Ircinia</i> 1255                       |                   | 1 | 0 | 0 | 0 | 0 | 0 |
| 274 | Demospongiae | Dictyoceratida | Irciniidae | <i>Ircinia</i>        | <i>Ircinia</i> 1257                       |                   | 0 | 1 | 0 | 0 | 0 | 0 |
| 275 | Demospongiae | Dictyoceratida | Irciniidae | <i>Ircinia</i>        | <i>Ircinia</i> sp. SS1                    |                   | 1 | 0 | 0 | 0 | 0 | 0 |
| 276 | Demospongiae | Dictyoceratida | Irciniidae | <i>Ircinia</i>        | <i>Ircinia</i> sp. WA1                    |                   | 0 | 1 | 0 | 0 | 0 | 0 |
| 277 | Demospongiae | Dictyoceratida | Irciniidae | <i>Ircinia</i>        | <i>Ircinia</i> sp. WA2                    |                   | 0 | 1 | 0 | 0 | 0 | 0 |
| 278 | Demospongiae | Dictyoceratida | Irciniidae | <i>Ircinia</i>        | <i>Ircinia</i> cf. sp.                    |                   | 0 | 0 | 0 | 1 | 0 | 0 |
| 279 | Demospongiae | Dictyoceratida | Irciniidae | <i>Psammocinia</i>    | <i>Psammocinia bulbosa</i>                | Bergquist, 1995   | 1 | 0 | 0 | 0 | 0 | 0 |
| 280 | Demospongiae | Dictyoceratida | Irciniidae | <i>Psammocinia</i>    | <i>Psammocinia</i> cf. <i>bulbosa</i>     | Bergquist, 1995   | 0 | 0 | 1 | 0 | 1 | 0 |
| 281 | Demospongiae | Dictyoceratida | Irciniidae | <i>Psammocinia</i>    | <i>Psammocinia</i> sp. 2                  |                   | 0 | 0 | 0 | 0 | 1 | 0 |
| 282 | Demospongiae | Dictyoceratida | Irciniidae | <i>Psammocinia</i>    | <i>Psammocinia</i> sp. 3                  |                   | 0 | 0 | 1 | 0 | 0 | 0 |
| 283 | Demospongiae | Dictyoceratida | Irciniidae | <i>Psammocinia</i>    | <i>Psammocinia</i> sp. 4                  |                   | 0 | 0 | 1 | 0 | 0 | 0 |
| 284 | Demospongiae | Dictyoceratida | Irciniidae | <i>Psammocinia</i>    | <i>Psammocinia</i> sp. 5                  |                   | 0 | 0 | 1 | 0 | 0 | 0 |
| 285 | Demospongiae | Dictyoceratida | Irciniidae | <i>Psammocinia</i>    | <i>Psammocinia</i> sp. 6                  |                   | 0 | 0 | 1 | 0 | 0 | 0 |
| 286 | Demospongiae | Dictyoceratida | Irciniidae | <i>Psammocinia</i>    | <i>Psammocinia</i> sp. 7                  |                   | 0 | 0 | 1 | 0 | 0 | 0 |
| 287 | Demospongiae | Dictyoceratida | Irciniidae | <i>Psammocinia</i>    | <i>Psammocinia</i> sp. 10                 |                   | 0 | 0 | 0 | 0 | 1 | 0 |
| 288 | Demospongiae | Dictyoceratida | Irciniidae | <i>Psammocinia</i>    | <i>Psammocinia</i> sp. 305                |                   | 1 | 1 | 0 | 0 | 0 | 0 |
| 289 | Demospongiae | Dictyoceratida | Irciniidae | <i>Psammocinia</i>    | <i>Psammocinia</i> sp. 394                |                   | 1 | 1 | 0 | 0 | 0 | 0 |
| 290 | Demospongiae | Dictyoceratida | Irciniidae | <i>Psammocinia</i>    | <i>Psammocinia</i> sp. 487                |                   | 1 | 0 | 0 | 0 | 0 | 0 |
| 291 | Demospongiae | Dictyoceratida | Irciniidae | <i>Psammocinia</i>    | <i>Psammocinia</i> sp. 1791               |                   | 1 | 1 | 0 | 0 | 0 | 0 |
| 292 | Demospongiae | Dictyoceratida | Irciniidae | <i>Psammocinia</i>    | <i>Psammocinia</i> sp. Ng3                |                   | 0 | 0 | 0 | 1 | 0 | 0 |
| 293 | Demospongiae | Dictyoceratida | Irciniidae | <i>Psammocinia</i>    | <i>Psammocinia</i> sp. SS1                |                   | 0 | 0 | 0 | 1 | 0 | 1 |
| 294 | Demospongiae | Dictyoceratida | Irciniidae | <i>Psammocinia</i>    | <i>Psammocinia</i> sp. SS4                |                   | 0 | 1 | 0 | 0 | 0 | 0 |

|     |              |                |            |                     |                                                                        |                        |   |   |   |   |   |   |
|-----|--------------|----------------|------------|---------------------|------------------------------------------------------------------------|------------------------|---|---|---|---|---|---|
| 295 | Demospongiae | Dictyoceratida | Irciniidae | <i>Psammocinia</i>  | <i>Psammocinia</i> spp.                                                |                        | 0 | 0 | 1 | 1 | 0 | 0 |
| 296 | Demospongiae | Dictyoceratida | Irciniidae | <i>Sarcotragus</i>  | <i>Sarcotragus</i> sp. 1                                               |                        | 0 | 0 | 1 | 0 | 0 | 0 |
| 297 | Demospongiae | Dictyoceratida | Irciniidae | <i>Sarcotragus</i>  | <i>Sarcotragus</i> sp. 2                                               |                        | 0 | 0 | 1 | 0 | 0 | 0 |
| 298 | Demospongiae | Dictyoceratida | Irciniidae | <i>Sarcotragus</i>  | <i>Sarcotragus</i> sp. 3                                               |                        | 0 | 1 | 1 | 0 | 0 | 0 |
| 299 | Demospongiae | Dictyoceratida | Irciniidae | <i>Sarcotragus</i>  | <i>Sarcotragus</i> sp. 5                                               |                        | 0 | 0 | 0 | 0 | 1 | 0 |
| 300 | Demospongiae | Dictyoceratida | Irciniidae | <i>Sarcotragus</i>  | <i>Sarcotragus</i> sp. CERF3                                           |                        | 0 | 0 | 0 | 1 | 0 | 0 |
| 301 | Demospongiae | Dictyoceratida | Irciniidae | <i>Sarcotragus</i>  | <i>Sarcotragus</i> sp. EG1                                             |                        | 0 | 0 | 0 | 0 | 1 | 0 |
| 302 | Demospongiae | Dictyoceratida | Irciniidae | <i>Sarcotragus</i>  | <i>Sarcotragus</i> sp. Ng1                                             |                        | 1 | 1 | 0 | 1 | 1 | 0 |
| 303 | Demospongiae | Dictyoceratida | Irciniidae | <i>Sarcotragus</i>  | <i>Sarcotragus</i> sp. NW1                                             |                        | 0 | 0 | 0 | 1 | 0 | 0 |
| 304 | Demospongiae | Dictyoceratida | Irciniidae | <i>Sarcotragus</i>  | <i>Sarcotragus</i> sp. SS1                                             |                        | 0 | 1 | 1 | 1 | 1 | 0 |
| 305 | Demospongiae | Dictyoceratida | Irciniidae | <i>Sarcotragus</i>  | <i>Sarcotragus</i> sp. SS2                                             |                        | 0 | 0 | 0 | 1 | 0 | 0 |
| 306 | Demospongiae | Dictyoceratida | Irciniidae | <i>Sarcotragus</i>  | <i>Sarcotragus</i> sp. SS3                                             |                        | 0 | 0 | 0 | 1 | 0 | 0 |
| 307 | Demospongiae | Dictyoceratida | Irciniidae | <i>Sarcotragus</i>  | <i>Sarcotragus</i> sp. SS4                                             |                        | 0 | 1 | 1 | 0 | 0 | 0 |
| 308 | Demospongiae | Dictyoceratida | Irciniidae | <i>Sarcotragus</i>  | <i>Sarcotragus</i> sp. SS5                                             |                        | 0 | 0 | 1 | 0 | 0 | 0 |
| 309 | Demospongiae | Dictyoceratida | Irciniidae | <i>Sarcotragus</i>  | <i>Sarcotragus</i> sp. SS7                                             |                        | 0 | 1 | 1 | 1 | 0 | 0 |
| 310 | Demospongiae | Dictyoceratida | Irciniidae | <i>Sarcotragus</i>  | <i>Sarcotragus</i> sp. SS8                                             |                        | 0 | 1 | 1 | 0 | 1 | 0 |
| 311 | Demospongiae | Dictyoceratida | Irciniidae | <i>Sarcotragus</i>  | <i>Sarcotragus</i> sp. SS11                                            |                        | 0 | 1 | 0 | 0 | 0 | 0 |
| 312 | Demospongiae | Dictyoceratida | Irciniidae | <i>Sarcotragus</i>  | <i>Sarcotragus</i> sp. SS15                                            |                        | 1 | 0 | 0 | 0 | 0 | 0 |
| 313 | Demospongiae | Dictyoceratida | Spongiidae | <i>Coscinoderma</i> | <i>Coscinoderma</i> cf. <i>pesleonis</i> = <i>Coscinoderma</i> sp. 693 | (Lamarck, 1813)        | 0 | 0 | 1 | 0 | 0 | 0 |
| 314 | Demospongiae | Dictyoceratida | Spongiidae | <i>Coscinoderma</i> | <i>Coscinoderma matthewsi</i>                                          | (Von Lendenfeld, 1886) | 0 | 0 | 1 | 0 | 0 | 0 |
| 315 | Demospongiae | Dictyoceratida | Spongiidae | <i>Coscinoderma</i> | <i>Coscinoderma nardorus</i>                                           | (Von Lendenfeld, 1886) | 0 | 1 | 0 | 0 | 0 | 0 |
| 316 | Demospongiae | Dictyoceratida | Spongiidae | <i>Coscinoderma</i> | <i>Coscinoderma</i> sp. 1                                              |                        | 0 | 0 | 1 | 0 | 0 | 0 |
| 317 | Demospongiae | Dictyoceratida | Spongiidae | <i>Coscinoderma</i> | <i>Coscinoderma</i> sp. 119                                            |                        | 1 | 0 | 0 | 0 | 0 | 0 |
| 318 | Demospongiae | Dictyoceratida | Spongiidae | <i>Coscinoderma</i> | <i>Coscinoderma</i> spp.                                               |                        | 0 | 0 | 0 | 1 | 0 | 0 |
| 319 | Demospongiae | Dictyoceratida | Spongiidae | <i>Hippospongia</i> | <i>Hippospongia communis</i>                                           | (Lamarck, 1814)        | 1 | 0 | 0 | 0 | 0 | 0 |
| 320 | Demospongiae | Dictyoceratida | Spongiidae | <i>Hippospongia</i> | <i>Hippospongia</i> sp. SS1                                            |                        | 0 | 1 | 1 | 0 | 1 | 0 |
| 321 | Demospongiae | Dictyoceratida | Spongiidae | <i>Hippospongia</i> | <i>Hippospongia</i> sp. SS2                                            |                        | 0 | 0 | 0 | 1 | 1 | 0 |
| 322 | Demospongiae | Dictyoceratida | Spongiidae | <i>Hippospongia</i> | <i>Hippospongia</i> sp. SS4                                            |                        | 0 | 1 | 0 | 0 | 0 | 0 |
| 323 | Demospongiae | Dictyoceratida | Spongiidae | <i>Hippospongia</i> | <i>Hippospongia</i> sp.                                                |                        | 0 | 1 | 0 | 0 | 0 | 0 |
| 324 | Demospongiae | Dictyoceratida | Spongiidae | <i>Hyattella</i>    | <i>Hyattella intestinalis</i>                                          | (Lamarck, 1814)        | 1 | 1 | 1 | 0 | 0 | 0 |
| 325 | Demospongiae | Dictyoceratida | Spongiidae | <i>Hyattella</i>    | <i>Hyattella</i> cf. <i>intestinalis</i>                               | (Lamarck, 1814)        | 0 | 1 | 1 | 0 | 0 | 0 |
| 326 | Demospongiae | Dictyoceratida | Spongiidae | <i>Hyattella</i>    | <i>Hyattella</i> sp. 1                                                 |                        | 0 | 0 | 1 | 0 | 0 | 0 |
| 327 | Demospongiae | Dictyoceratida | Spongiidae | <i>Hyattella</i>    | <i>Hyattella</i> sp. QM2                                               |                        | 0 | 0 | 0 | 0 | 1 | 0 |
| 328 | Demospongiae | Dictyoceratida | Spongiidae | <i>Hyattella</i>    | <i>Hyattella</i> sp. SS1                                               |                        | 0 | 1 | 0 | 0 | 0 | 0 |
| 329 | Demospongiae | Dictyoceratida | Spongiidae | <i>Hyattella</i>    | <i>Hyattella?</i> sp.                                                  |                        | 1 | 0 | 0 | 0 | 0 | 0 |
| 330 | Demospongiae | Dictyoceratida | Spongiidae | <i>Leiosella</i>    | <i>Leiosella ramosa</i>                                                | Bergquist, 1995        | 1 | 0 | 0 | 0 | 0 | 0 |
| 331 | Demospongiae | Dictyoceratida | Spongiidae | <i>Leiosella</i>    | <i>Leiosella</i> sp. 1                                                 |                        | 0 | 0 | 0 | 0 | 1 | 0 |
| 332 | Demospongiae | Dictyoceratida | Spongiidae | <i>Spongia</i>      | <i>Spongia (Australospongia)</i> sp. 1                                 |                        | 0 | 0 | 1 | 0 | 0 | 0 |
| 333 | Demospongiae | Dictyoceratida | Spongiidae | <i>Spongia</i>      | <i>Spongia (Heterofibria)</i> sp. 1                                    |                        | 0 | 0 | 1 | 0 | 0 | 0 |
| 334 | Demospongiae | Dictyoceratida | Spongiidae | <i>Spongia</i>      | <i>Spongia (Heterofibria)</i> sp. 2                                    |                        | 0 | 0 | 1 | 0 | 0 | 0 |

|     |              |                |             |                         |                                                    |                   |   |   |   |   |   |   |
|-----|--------------|----------------|-------------|-------------------------|----------------------------------------------------|-------------------|---|---|---|---|---|---|
| 335 | Demospongiae | Dictyoceratida | Spongiidae  | <i>Spongia</i>          | <i>Spongia (Heterofibria)</i> sp. Ng1              |                   | 0 | 0 | 0 | 1 | 0 | 0 |
| 336 | Demospongiae | Dictyoceratida | Spongiidae  | <i>Spongia</i>          | <i>Spongia (Heterofibria)</i> sp. Ng2              |                   | 0 | 0 | 0 | 1 | 0 | 0 |
| 337 | Demospongiae | Dictyoceratida | Spongiidae  | <i>Spongia</i>          | <i>Spongia (Heterofibria)</i> sp. SS1              |                   | 1 | 1 | 1 | 0 | 0 | 0 |
| 338 | Demospongiae | Dictyoceratida | Spongiidae  | <i>Spongia</i>          | <i>Spongia (Spongia) hispida</i>                   | Lamarck, 1814     | 0 | 0 | 1 | 0 | 0 | 0 |
| 339 | Demospongiae | Dictyoceratida | Spongiidae  | <i>Spongia</i>          | <i>Spongia (Spongia)</i> sp. 1                     |                   | 0 | 0 | 1 | 0 | 0 | 0 |
| 340 | Demospongiae | Dictyoceratida | Spongiidae  | <i>Spongia</i>          | <i>Spongia</i> sp. 1804                            |                   | 1 | 0 | 0 | 0 | 0 | 0 |
| 341 | Demospongiae | Dictyoceratida | Spongiidae  | <i>Spongia</i>          | <i>Spongia</i> sp. 256                             |                   | 1 | 0 | 0 | 0 | 0 | 0 |
| 342 | Demospongiae | Dictyoceratida | Spongiidae  | <i>Spongia</i>          | <i>Spongia</i> 356                                 |                   | 1 | 0 | 1 | 0 | 0 | 0 |
| 343 | Demospongiae | Dictyoceratida | Spongiidae  | <i>Spongia</i>          | <i>Spongia</i> sp. QM5                             |                   | 0 | 1 | 0 | 0 | 0 | 0 |
| 344 | Demospongiae | Dictyoceratida | Spongiidae  | <i>Spongia</i>          | <i>Spongia</i> sp. QM6                             |                   | 0 | 1 | 0 | 0 | 0 | 0 |
| 345 | Demospongiae | Dictyoceratida | Thorectidae | <i>Aplysinopsis</i>     | <i>Aplysinopsis</i> sp. 1                          |                   | 0 | 0 | 1 | 0 | 0 | 0 |
| 346 | Demospongiae | Dictyoceratida | Thorectidae | <i>Aplysinopsis</i>     | <i>Aplysinopsis</i> 330                            |                   | 1 | 1 | 0 | 0 | 0 | 0 |
| 347 | Demospongiae | Dictyoceratida | Thorectidae | <i>Aplysinopsis</i>     | <i>Aplysinopsis</i> 1810                           |                   | 1 | 0 | 0 | 0 | 0 | 0 |
| 348 | Demospongiae | Dictyoceratida | Thorectidae | <i>Aplysinopsis</i>     | <i>Aplysinopsis</i> sp. SS1                        |                   | 0 | 0 | 1 | 0 | 1 | 0 |
| 349 | Demospongiae | Dictyoceratida | Thorectidae | <i>Aplysinopsis</i>     | <i>Aplysinopsis</i> sp. SS2                        |                   | 0 | 0 | 0 | 1 | 0 | 0 |
| 350 | Demospongiae | Dictyoceratida | Thorectidae | <i>Cacospongia</i>      | <i>Cacospongia</i> sp. 1                           |                   | 0 | 0 | 0 | 1 | 0 | 0 |
| 351 | Demospongiae | Dictyoceratida | Thorectidae | <i>Cacospongia</i>      | <i>Cacospongia</i> sp. 2                           |                   | 0 | 0 | 0 | 1 | 0 | 0 |
| 352 | Demospongiae | Dictyoceratida | Thorectidae | <i>Cacospongia</i>      | <i>Cacospongia</i> sp. EG1                         |                   | 0 | 0 | 1 | 0 | 0 | 0 |
| 353 | Demospongiae | Dictyoceratida | Thorectidae | <i>Cacospongia</i>      | <i>Cacospongia</i> sp. Ng1                         |                   | 0 | 0 | 0 | 1 | 0 | 0 |
| 354 | Demospongiae | Dictyoceratida | Thorectidae | <i>Cacospongia</i>      | <i>Cacospongia</i> sp. Pilb1                       |                   | 0 | 0 | 1 | 0 | 0 | 0 |
| 355 | Demospongiae | Dictyoceratida | Thorectidae | <i>Cacospongia</i>      | <i>Cacospongia</i> sp. QM3                         |                   | 0 | 1 | 0 | 0 | 0 | 0 |
| 356 | Demospongiae | Dictyoceratida | Thorectidae | <i>Cacospongia</i>      | <i>Cacospongia</i> sp. SS1                         |                   | 1 | 0 | 0 | 0 | 0 | 0 |
| 357 | Demospongiae | Dictyoceratida | Thorectidae | <i>Cacospongia</i>      | <i>Cacospongia</i> sp. SS2                         |                   | 0 | 1 | 0 | 0 | 0 | 0 |
| 358 | Demospongiae | Dictyoceratida | Thorectidae | <i>Cacospongia</i>      | <i>Cacospongia</i> sp. SS4                         |                   | 0 | 1 | 0 | 0 | 0 | 0 |
| 359 | Demospongiae | Dictyoceratida | Thorectidae | <i>Carteriospongia</i>  | <i>Carteriospongia flabellifera</i>                | (Bowerbank, 1877) | 0 | 1 | 0 | 0 | 0 | 0 |
| 360 | Demospongiae | Dictyoceratida | Thorectidae | <i>Carteriospongia</i>  | <i>Carteriospongia</i> cf. <i>flabellifera</i>     | (Bowerbank, 1877) | 0 | 0 | 1 | 0 | 0 | 0 |
| 361 | Demospongiae | Dictyoceratida | Thorectidae | <i>Carteriospongia</i>  | <i>Carteriospongia</i> cf. <i>foliascens</i> sp. 1 | (Pallas, 1766)    | 0 | 1 | 0 | 0 | 0 | 0 |
| 362 | Demospongiae | Dictyoceratida | Thorectidae | <i>Carteriospongia</i>  | <i>Carteriospongia</i> cf. <i>foliascens</i> sp. 2 | (Pallas, 1766)    | 1 | 1 | 0 | 0 | 0 | 0 |
| 363 | Demospongiae | Dictyoceratida | Thorectidae | <i>Carteriospongia</i>  | <i>Carteriospongia</i> sp. 1                       |                   | 0 | 0 | 1 | 0 | 0 | 0 |
| 364 | Demospongiae | Dictyoceratida | Thorectidae | <i>Carteriospongia</i>  | <i>Carteriospongia</i> sp. 2                       |                   | 0 | 0 | 1 | 0 | 0 | 0 |
| 365 | Demospongiae | Dictyoceratida | Thorectidae | <i>Carteriospongia</i>  | <i>Carteriospongia</i> sp. 3                       |                   | 0 | 0 | 1 | 0 | 0 | 0 |
| 366 | Demospongiae | Dictyoceratida | Thorectidae | <i>Carteriospongia</i>  | <i>Carteriospongia</i> 379                         |                   | 1 | 1 | 0 | 0 | 0 | 0 |
| 367 | Demospongiae | Dictyoceratida | Thorectidae | <i>Carteriospongia</i>  | <i>Carteriospongia</i> sp. QM2                     |                   | 0 | 1 | 0 | 0 | 0 | 0 |
| 368 | Demospongiae | Dictyoceratida | Thorectidae | <i>Carteriospongia</i>  | <i>Carteriospongia</i> sp. QM1                     |                   | 0 | 1 | 0 | 0 | 0 | 0 |
| 369 | Demospongiae | Dictyoceratida | Thorectidae | <i>Dactylospongia</i>   | <i>Dactylospongia</i> 1811                         |                   | 1 | 0 | 0 | 0 | 0 | 0 |
| 370 | Demospongiae | Dictyoceratida | Thorectidae | <i>Fascaplysinopsis</i> | <i>Fascaplysinopsis</i> 1777                       |                   | 1 | 0 | 0 | 0 | 0 | 0 |
| 371 | Demospongiae | Dictyoceratida | Thorectidae | <i>Fascaplysinopsis</i> | <i>Fascaplysinopsis</i> 1798                       |                   | 1 | 0 | 0 | 0 | 0 | 0 |
| 372 | Demospongiae | Dictyoceratida | Thorectidae | <i>Fasciospongia</i>    | <i>Fasciospongia costifera</i>                     | (Lamarck, 1814)   | 1 | 1 | 0 | 0 | 0 | 0 |
| 373 | Demospongiae | Dictyoceratida | Thorectidae | <i>Fasciospongia</i>    | <i>Fasciospongia</i> sp. 1                         |                   | 0 | 1 | 1 | 0 | 0 | 0 |
| 374 | Demospongiae | Dictyoceratida | Thorectidae | <i>Fasciospongia</i>    | <i>Fasciospongia</i> 49                            |                   | 0 | 1 | 0 | 0 | 0 | 0 |

|     |              |                |             |                        |                                           |                |   |   |   |   |   |   |
|-----|--------------|----------------|-------------|------------------------|-------------------------------------------|----------------|---|---|---|---|---|---|
| 375 | Demospongiae | Dictyoceratida | Thorectidae | <i>Fasciospongia</i>   | <i>Fasciospongia</i> 290                  |                | 1 | 1 | 0 | 0 | 0 | 0 |
| 376 | Demospongiae | Dictyoceratida | Thorectidae | <i>Fasciospongia</i>   | <i>Fasciospongia</i> 1318                 |                | 1 | 0 | 0 | 0 | 0 | 0 |
| 377 | Demospongiae | Dictyoceratida | Thorectidae | <i>Fasciospongia</i>   | <i>Fasciospongia</i> sp. QM2              |                | 0 | 1 | 0 | 0 | 0 | 0 |
| 378 | Demospongiae | Dictyoceratida | Thorectidae | <i>Fenestraspongia</i> | <i>Fenestraspongia</i> sp. 1              |                | 0 | 0 | 1 | 0 | 0 | 0 |
| 379 | Demospongiae | Dictyoceratida | Thorectidae | <i>Hyrtios</i>         | <i>Hyrtios</i> cf. <i>erectus</i>         | (Keller, 1889) | 0 | 1 | 1 | 0 | 0 | 0 |
| 380 | Demospongiae | Dictyoceratida | Thorectidae | <i>Hyrtios</i>         | <i>Hyrtios</i> sp. 1                      |                | 0 | 0 | 1 | 1 | 0 | 0 |
| 381 | Demospongiae | Dictyoceratida | Thorectidae | <i>Hyrtios</i>         | <i>Hyrtios</i> sp. 2                      |                | 0 | 0 | 0 | 1 | 0 | 0 |
| 382 | Demospongiae | Dictyoceratida | Thorectidae | <i>Hyrtios</i>         | <i>Hyrtios</i> sp. 3                      |                | 0 | 0 | 0 | 1 | 0 | 0 |
| 383 | Demospongiae | Dictyoceratida | Thorectidae | <i>Hyrtios</i>         | <i>Hyrtios</i> 561                        |                | 1 | 0 | 0 | 0 | 0 | 0 |
| 384 | Demospongiae | Dictyoceratida | Thorectidae | <i>Hyrtios</i>         | <i>Hyrtios</i> sp. SS4                    |                | 0 | 1 | 0 | 0 | 0 | 0 |
| 385 | Demospongiae | Dictyoceratida | Thorectidae | <i>Luffariella</i>     | <i>Luffariella</i> sp. 1                  |                | 0 | 0 | 1 | 0 | 0 | 0 |
| 386 | Demospongiae | Dictyoceratida | Thorectidae | <i>Luffariella</i>     | <i>Luffariella</i> sp. 2                  |                | 0 | 1 | 0 | 0 | 1 | 0 |
| 387 | Demospongiae | Dictyoceratida | Thorectidae | <i>Luffariella</i>     | <i>Luffariella</i> sp. 3                  |                | 0 | 0 | 0 | 0 | 1 | 0 |
| 388 | Demospongiae | Dictyoceratida | Thorectidae | <i>Luffariella</i>     | <i>Luffariella</i> 295                    |                | 1 | 0 | 0 | 0 | 0 | 0 |
| 389 | Demospongiae | Dictyoceratida | Thorectidae | <i>Luffariella</i>     | <i>Luffariella</i> 338                    |                | 0 | 1 | 0 | 0 | 0 | 0 |
| 390 | Demospongiae | Dictyoceratida | Thorectidae | <i>Luffariella</i>     | <i>Luffariella</i> 380                    |                | 1 | 1 | 0 | 0 | 0 | 0 |
| 391 | Demospongiae | Dictyoceratida | Thorectidae | <i>Luffariella</i>     | <i>Luffariella</i> sp. Ng1                |                | 0 | 0 | 0 | 0 | 1 | 0 |
| 392 | Demospongiae | Dictyoceratida | Thorectidae | <i>Luffariella</i>     | <i>Luffariella</i> ? sp. Pilb1            |                | 0 | 0 | 1 | 0 | 0 | 0 |
| 393 | Demospongiae | Dictyoceratida | Thorectidae | <i>Luffariella</i>     | <i>Luffariella</i> sp. SS1                |                | 0 | 1 | 0 | 0 | 1 | 0 |
| 394 | Demospongiae | Dictyoceratida | Thorectidae | <i>Luffariella</i>     | <i>Luffariella</i> sp. SS4                |                | 0 | 1 | 0 | 0 | 0 | 0 |
| 395 | Demospongiae | Dictyoceratida | Thorectidae | <i>Luffariella</i>     | <i>Luffariella</i> sp. SS6                |                | 0 | 0 | 0 | 1 | 0 | 0 |
| 396 | Demospongiae | Dictyoceratida | Thorectidae | <i>Luffariella</i>     | <i>Luffariella</i> sp. SS7                |                | 0 | 1 | 0 | 0 | 0 | 0 |
| 397 | Demospongiae | Dictyoceratida | Thorectidae | <i>Luffariella</i>     | <i>Luffariella</i> sp. SS8                |                | 0 | 1 | 0 | 0 | 0 | 0 |
| 398 | Demospongiae | Dictyoceratida | Thorectidae | <i>Luffariella</i>     | <i>Luffariella</i> sp. SS9                |                | 1 | 0 | 0 | 0 | 0 | 0 |
| 399 | Demospongiae | Dictyoceratida | Thorectidae | <i>Luffariella</i>     | <i>Luffariella</i> spp.                   |                | 0 | 1 | 0 | 1 | 0 | 0 |
| 400 | Demospongiae | Dictyoceratida | Thorectidae | <i>Phyllospongia</i>   | <i>Phyllospongia papyracea</i>            | (Esper, 1794)  | 0 | 1 | 0 | 0 | 0 | 0 |
| 401 | Demospongiae | Dictyoceratida | Thorectidae | <i>Phyllospongia</i>   | <i>Phyllospongia</i> cf. <i>papyracea</i> | (Esper, 1794)  | 0 | 0 | 1 | 0 | 0 | 0 |
| 402 | Demospongiae | Dictyoceratida | Thorectidae | <i>Phyllospongia</i>   | <i>Phyllospongia</i> spp.                 |                | 0 | 0 | 0 | 1 | 0 | 0 |
| 403 | Demospongiae | Dictyoceratida | Thorectidae | <i>Scalarispongia</i>  | <i>Scalarispongia</i> sp. 1               |                | 0 | 0 | 1 | 0 | 0 | 0 |
| 404 | Demospongiae | Dictyoceratida | Thorectidae | <i>Smenospongia</i>    | <i>Smenospongia</i> sp. QM1               |                | 0 | 1 | 0 | 0 | 1 | 0 |
| 405 | Demospongiae | Dictyoceratida | Thorectidae | <i>Taonura</i>         | <i>Taonura</i> sp. 1                      |                | 0 | 0 | 1 | 0 | 0 | 0 |
| 406 | Demospongiae | Dictyoceratida | Thorectidae | <i>Taonura</i>         | <i>Taonura</i> sp. 2                      |                | 0 | 0 | 1 | 0 | 0 | 0 |
| 407 | Demospongiae | Dictyoceratida | Thorectidae | <i>Taonura</i>         | <i>Taonura</i> sp. SS2                    |                | 1 | 1 | 0 | 0 | 0 | 0 |
| 408 | Demospongiae | Dictyoceratida | Thorectidae | <i>Taonura</i>         | <i>Taonura</i> sp. SS3                    |                | 0 | 1 | 0 | 0 | 0 | 0 |
| 409 | Demospongiae | Dictyoceratida | Thorectidae | <i>Thorecta</i>        | <i>Thorecta</i> sp. 2                     |                | 0 | 0 | 0 | 0 | 1 | 0 |
| 410 | Demospongiae | Dictyoceratida | Thorectidae | <i>Thorecta</i>        | <i>Thorecta</i> sp. 2?                    |                | 0 | 0 | 0 | 0 | 1 | 0 |
| 411 | Demospongiae | Dictyoceratida | Thorectidae | <i>Thorecta</i>        | <i>Thorecta</i> 11                        |                | 0 | 1 | 0 | 0 | 0 | 0 |
| 412 | Demospongiae | Dictyoceratida | Thorectidae | <i>Thorecta</i>        | <i>Thorecta</i> 44                        |                | 1 | 0 | 0 | 0 | 0 | 0 |
| 413 | Demospongiae | Dictyoceratida | Thorectidae | <i>Thorecta</i>        | <i>Thorecta</i> 1792                      |                | 0 | 1 | 0 | 0 | 0 | 0 |
| 414 | Demospongiae | Dictyoceratida | Thorectidae | <i>Thorecta</i>        | <i>Thorecta</i> 1796                      |                | 1 | 0 | 0 | 0 | 0 | 0 |

|     |              |                |                 |                                |                                                                    |                    |   |   |   |   |   |   |
|-----|--------------|----------------|-----------------|--------------------------------|--------------------------------------------------------------------|--------------------|---|---|---|---|---|---|
| 415 | Demospongiae | Dictyoceratida | Thorectidae     | <i>Thorecta</i>                | <i>Thorecta</i> sp. Ng1                                            |                    | 0 | 0 | 0 | 1 | 0 | 0 |
| 416 | Demospongiae | Dictyoceratida | Thorectidae     | <i>Thorecta</i>                | <i>Thorecta</i> sp. Ng2                                            |                    | 0 | 0 | 0 | 1 | 0 | 1 |
| 417 | Demospongiae | Dictyoceratida | Thorectidae     | <i>Thorecta</i>                | <i>Thorecta</i> sp. SS1                                            |                    | 0 | 0 | 0 | 1 | 0 | 0 |
| 418 | Demospongiae | Dictyoceratida | Thorectidae     | <i>Thorecta</i>                | <i>Thorecta</i> sp. SS2                                            |                    | 0 | 0 | 0 | 0 | 1 | 0 |
| 419 | Demospongiae | Dictyoceratida | Thorectidae     | <i>Thorecta</i>                | <i>Thorecta</i> sp. SS3                                            |                    | 0 | 0 | 0 | 1 | 0 | 0 |
| 420 | Demospongiae | Dictyoceratida | Thorectidae     | <i>Thorecta</i>                | <i>Thorecta</i> sp. SS5                                            |                    | 0 | 0 | 0 | 1 | 0 | 1 |
| 421 | Demospongiae | Dictyoceratida | Thorectidae     | <i>Thorectandra</i>            | <i>Thorectandra excavatus</i>                                      | (Ridley, 1884)     | 1 | 1 | 0 | 0 | 0 | 0 |
| 422 | Demospongiae | Dictyoceratida | Thorectidae     | <i>Thorectandra</i>            | <i>Thorectandra</i> sp. 1                                          |                    | 0 | 0 | 1 | 0 | 0 | 0 |
| 423 | Demospongiae | Dictyoceratida | Thorectidae     | <i>Thorectandra</i>            | <i>Thorectandra</i> 1782                                           |                    | 1 | 0 | 0 | 0 | 0 | 0 |
| 424 | Demospongiae | Dictyoceratida | Thorectidae     | <i>Thorectandra</i>            | <i>Thorectandra</i> 335                                            |                    | 1 | 0 | 0 | 0 | 0 | 0 |
| 425 | Demospongiae | Dictyoceratida | Thorectidae     | <i>Thorectandra</i>            | <i>Thorectandra</i> 348                                            |                    | 0 | 1 | 0 | 0 | 0 | 0 |
| 426 | Demospongiae | Dictyoceratida | Thorectidae     | Thorectidae unknown<br>genus_1 | Thorectidae sp. 1                                                  |                    | 0 | 0 | 0 | 1 | 0 | 0 |
| 427 | Demospongiae | Haplosclerida  | Callyspongiidae | <i>Arenosclera</i>             | <i>Arenosclera</i> sp. 1                                           |                    | 0 | 0 | 1 | 0 | 0 | 0 |
| 428 | Demospongiae | Haplosclerida  | Callyspongiidae | <i>Arenosclera</i>             | <i>Arenosclera</i> sp. EG1                                         |                    | 0 | 0 | 1 | 0 | 0 | 0 |
| 429 | Demospongiae | Haplosclerida  | Callyspongiidae | <i>Arenosclera</i>             | <i>Arenosclera</i> sp. EG2                                         |                    | 0 | 1 | 1 | 0 | 0 | 0 |
| 430 | Demospongiae | Haplosclerida  | Callyspongiidae | <i>Arenosclera</i>             | <i>Arenosclera</i> sp.                                             |                    | 0 | 0 | 0 | 1 | 0 | 0 |
| 431 | Demospongiae | Haplosclerida  | Callyspongiidae | <i>Callyspongia</i>            | <i>Callyspongia</i> ( <i>Callyspongia</i> ) 102                    |                    | 0 | 1 | 0 | 0 | 0 | 0 |
| 432 | Demospongiae | Haplosclerida  | Callyspongiidae | <i>Callyspongia</i>            | <i>Callyspongia</i> ( <i>Callyspongia</i> ) 108                    |                    | 0 | 1 | 0 | 0 | 0 | 0 |
| 433 | Demospongiae | Haplosclerida  | Callyspongiidae | <i>Callyspongia</i>            | <i>Callyspongia</i> ( <i>Callyspongia</i> ) 155                    |                    | 0 | 1 | 0 | 0 | 0 | 0 |
| 434 | Demospongiae | Haplosclerida  | Callyspongiidae | <i>Callyspongia</i>            | <i>Callyspongia</i> ( <i>Callyspongia</i> ) 233                    |                    | 0 | 1 | 1 | 0 | 0 | 0 |
| 435 | Demospongiae | Haplosclerida  | Callyspongiidae | <i>Callyspongia</i>            | <i>Callyspongia</i> ( <i>Callyspongia</i> ) 407                    |                    | 0 | 0 | 1 | 0 | 0 | 0 |
| 436 | Demospongiae | Haplosclerida  | Callyspongiidae | <i>Callyspongia</i>            | <i>Callyspongia</i> ( <i>Callyspongia</i> ) 556                    |                    | 1 | 0 | 0 | 0 | 0 | 0 |
| 437 | Demospongiae | Haplosclerida  | Callyspongiidae | <i>Callyspongia</i>            | <i>Callyspongia</i> ( <i>Callyspongia</i> ) 1778                   |                    | 0 | 1 | 0 | 0 | 0 | 0 |
| 438 | Demospongiae | Haplosclerida  | Callyspongiidae | <i>Callyspongia</i>            | <i>Callyspongia</i> ( <i>Callyspongia</i> ) 1808                   |                    | 0 | 1 | 0 | 0 | 0 | 0 |
| 439 | Demospongiae | Haplosclerida  | Callyspongiidae | <i>Callyspongia</i>            | <i>Callyspongia</i> ( <i>Callyspongia</i> ) 1819                   |                    | 1 | 1 | 0 | 0 | 0 | 0 |
| 440 | Demospongiae | Haplosclerida  | Callyspongiidae | <i>Callyspongia</i>            | <i>Callyspongia</i> ( <i>Callyspongia</i> ) sp. EG1                |                    | 0 | 1 | 1 | 0 | 0 | 0 |
| 441 | Demospongiae | Haplosclerida  | Callyspongiidae | <i>Callyspongia</i>            | <i>Callyspongia</i> ( <i>Callyspongia</i> ) sp. EG2                |                    | 0 | 0 | 1 | 0 | 0 | 0 |
| 442 | Demospongiae | Haplosclerida  | Callyspongiidae | <i>Callyspongia</i>            | <i>Callyspongia</i> ( <i>Callyspongia</i> ) sp. EG3                |                    | 0 | 0 | 1 | 0 | 0 | 0 |
| 443 | Demospongiae | Haplosclerida  | Callyspongiidae | <i>Callyspongia</i>            | <i>Callyspongia</i> ( <i>Callyspongia</i> ) sp. EG4                |                    | 0 | 0 | 1 | 0 | 0 | 0 |
| 444 | Demospongiae | Haplosclerida  | Callyspongiidae | <i>Callyspongia</i>            | <i>Callyspongia</i> ( <i>Callyspongia</i> ) sp. Ng1                |                    | 0 | 0 | 0 | 1 | 1 | 0 |
| 445 | Demospongiae | Haplosclerida  | Callyspongiidae | <i>Callyspongia</i>            | <i>Callyspongia</i> ( <i>Callyspongia</i> ) sp. Ng2                |                    | 0 | 0 | 0 | 1 | 0 | 0 |
| 446 | Demospongiae | Haplosclerida  | Callyspongiidae | <i>Callyspongia</i>            | <i>Callyspongia</i> ( <i>Callyspongia</i> ) sp. SS1                |                    | 0 | 0 | 1 | 0 | 0 | 0 |
| 447 | Demospongiae | Haplosclerida  | Callyspongiidae | <i>Callyspongia</i>            | <i>Callyspongia</i> ( <i>Callyspongia</i> ) sp. V                  |                    | 0 | 0 | 1 | 0 | 0 | 0 |
| 448 | Demospongiae | Haplosclerida  | Callyspongiidae | <i>Callyspongia</i>            | <i>Callyspongia</i> ( <i>Cladochalina</i> ) cf. <i>subarmigera</i> | (Ridley, 1884)     | 0 | 0 | 1 | 0 | 0 | 0 |
| 449 | Demospongiae | Haplosclerida  | Callyspongiidae | <i>Callyspongia</i>            | <i>Callyspongia</i> ( <i>Euplaccella</i> ) <i>communis</i>         | (Carter, 1881)     | 0 | 1 | 0 | 0 | 0 | 0 |
| 450 | Demospongiae | Haplosclerida  | Callyspongiidae | <i>Callyspongia</i>            | <i>Callyspongia</i> ( <i>Euplaccella</i> ) 1809                    |                    | 0 | 1 | 0 | 0 | 0 | 0 |
| 451 | Demospongiae | Haplosclerida  | Callyspongiidae | <i>Callyspongia</i>            | <i>Callyspongia</i> ( <i>Toxochalina</i> ) <i>schulzei</i>         | (Kieschnick, 1900) | 1 | 0 | 0 | 0 | 0 | 0 |
| 452 | Demospongiae | Haplosclerida  | Callyspongiidae | <i>Callyspongia</i>            | <i>Callyspongia</i> ( <i>Toxochalina</i> ) sp. 1                   |                    | 0 | 0 | 1 | 0 | 0 | 0 |
| 453 | Demospongiae | Haplosclerida  | Callyspongiidae | <i>Callyspongia</i>            | <i>Callyspongia</i> ( <i>Toxochalina</i> ) sp. 2                   |                    | 0 | 0 | 1 | 0 | 0 | 0 |

|     |              |               |                 |                     |                                            |               |   |   |   |   |   |   |
|-----|--------------|---------------|-----------------|---------------------|--------------------------------------------|---------------|---|---|---|---|---|---|
| 454 | Demospongiae | Haplosclerida | Callyspongiidae | <i>Callyspongia</i> | <i>Callyspongia (Toxochalina)</i> sp. 3    |               | 0 | 0 | 1 | 0 | 0 | 0 |
| 455 | Demospongiae | Haplosclerida | Callyspongiidae | <i>Callyspongia</i> | <i>Callyspongia (Toxochalina)</i> 553      |               | 1 | 0 | 1 | 0 | 0 | 0 |
| 456 | Demospongiae | Haplosclerida | Callyspongiidae | <i>Callyspongia</i> | <i>Callyspongia (Toxochalina)</i> sp. EG1  |               | 0 | 0 | 1 | 0 | 0 | 0 |
| 457 | Demospongiae | Haplosclerida | Callyspongiidae | <i>Callyspongia</i> | <i>Callyspongia (Toxochalina)</i> sp. K1   |               | 0 | 1 | 0 | 0 | 0 | 0 |
| 458 | Demospongiae | Haplosclerida | Callyspongiidae | <i>Callyspongia</i> | <i>Callyspongia</i> sp. 5                  |               | 0 | 0 | 1 | 0 | 0 | 0 |
| 459 | Demospongiae | Haplosclerida | Callyspongiidae | <i>Callyspongia</i> | <i>Callyspongia</i> sp. 6                  |               | 0 | 0 | 1 | 0 | 0 | 0 |
| 460 | Demospongiae | Haplosclerida | Callyspongiidae | <i>Callyspongia</i> | <i>Callyspongia</i> sp. 7                  |               | 0 | 0 | 1 | 0 | 0 | 0 |
| 461 | Demospongiae | Haplosclerida | Callyspongiidae | <i>Callyspongia</i> | <i>Callyspongia</i> sp. 8                  |               | 0 | 0 | 1 | 0 | 0 | 0 |
| 462 | Demospongiae | Haplosclerida | Callyspongiidae | <i>Callyspongia</i> | <i>Callyspongia</i> sp. 9                  |               | 0 | 0 | 1 | 0 | 0 | 0 |
| 463 | Demospongiae | Haplosclerida | Callyspongiidae | <i>Callyspongia</i> | <i>Callyspongia</i> sp. 10                 |               | 0 | 0 | 1 | 0 | 0 | 0 |
| 464 | Demospongiae | Haplosclerida | Callyspongiidae | <i>Callyspongia</i> | <i>Callyspongia</i> sp. CERF3              |               | 0 | 0 | 0 | 1 | 0 | 0 |
| 465 | Demospongiae | Haplosclerida | Callyspongiidae | <i>Callyspongia</i> | <i>Callyspongia</i> sp. Ng1                |               | 0 | 0 | 0 | 1 | 0 | 0 |
| 466 | Demospongiae | Haplosclerida | Chalinidae      | <i>Chalinula</i>    | <i>Chalinula</i> sp. CERF1                 |               | 0 | 0 | 0 | 1 | 0 | 0 |
| 467 | Demospongiae | Haplosclerida | Chalinidae      | <i>Haliclona</i>    | <i>Haliclona (Gellius) amboinensis</i>     | (Lévi, 1961)  | 0 | 0 | 1 | 0 | 0 | 0 |
| 468 | Demospongiae | Haplosclerida | Chalinidae      | <i>Haliclona</i>    | <i>Haliclona (Gellius) cf. amboinensis</i> | (Lévi, 1961)  | 0 | 0 | 0 | 1 | 0 | 0 |
| 469 | Demospongiae | Haplosclerida | Chalinidae      | <i>Haliclona</i>    | <i>Haliclona (Gellius) cymaeformis</i>     | (Esper, 1794) | 0 | 1 | 1 | 1 | 0 | 0 |
| 470 | Demospongiae | Haplosclerida | Chalinidae      | <i>Haliclona</i>    | <i>Haliclona (Gellius)</i> 1252            |               | 0 | 1 | 0 | 0 | 0 | 0 |
| 471 | Demospongiae | Haplosclerida | Chalinidae      | <i>Haliclona</i>    | <i>Haliclona (Gellius)</i> sp. C           |               | 0 | 0 | 1 | 0 | 0 | 0 |
| 472 | Demospongiae | Haplosclerida | Chalinidae      | <i>Haliclona</i>    | <i>Haliclona (Haliclona)</i> 36            |               | 1 | 0 | 0 | 0 | 0 | 0 |
| 473 | Demospongiae | Haplosclerida | Chalinidae      | <i>Haliclona</i>    | <i>Haliclona (Haliclona)</i> 183           |               | 0 | 0 | 1 | 0 | 0 | 0 |
| 474 | Demospongiae | Haplosclerida | Chalinidae      | <i>Haliclona</i>    | <i>Haliclona (Haliclona)</i> 212           |               | 0 | 1 | 0 | 0 | 0 | 0 |
| 475 | Demospongiae | Haplosclerida | Chalinidae      | <i>Haliclona</i>    | <i>Haliclona (Haliclona)</i> 697           |               | 0 | 0 | 1 | 0 | 0 | 0 |
| 476 | Demospongiae | Haplosclerida | Chalinidae      | <i>Haliclona</i>    | <i>Haliclona (Haliclona)</i> 760           |               | 0 | 1 | 0 | 0 | 0 | 0 |
| 477 | Demospongiae | Haplosclerida | Chalinidae      | <i>Haliclona</i>    | <i>Haliclona (Haliclona)</i> sp. J         |               | 0 | 1 | 0 | 0 | 0 | 0 |
| 478 | Demospongiae | Haplosclerida | Chalinidae      | <i>Haliclona</i>    | <i>Haliclona (Haliclona)</i> sp. K         |               | 0 | 1 | 0 | 0 | 0 | 0 |
| 479 | Demospongiae | Haplosclerida | Chalinidae      | <i>Haliclona</i>    | <i>Haliclona (Haliclona)</i> sp. L         |               | 0 | 1 | 0 | 0 | 0 | 0 |
| 480 | Demospongiae | Haplosclerida | Chalinidae      | <i>Haliclona</i>    | <i>Haliclona (Haliclona)</i> sp. M         |               | 0 | 1 | 0 | 0 | 0 | 0 |
| 481 | Demospongiae | Haplosclerida | Chalinidae      | <i>Haliclona</i>    | <i>Haliclona (Haliclona)</i> sp. Ng1       |               | 0 | 1 | 0 | 1 | 1 | 1 |
| 482 | Demospongiae | Haplosclerida | Chalinidae      | <i>Haliclona</i>    | <i>Haliclona (Haliclona)</i> sp. Ng2       |               | 0 | 0 | 0 | 1 | 0 | 0 |
| 483 | Demospongiae | Haplosclerida | Chalinidae      | <i>Haliclona</i>    | <i>Haliclona (Haliclona)</i> sp. Ng3       |               | 0 | 0 | 0 | 0 | 0 | 1 |
| 484 | Demospongiae | Haplosclerida | Chalinidae      | <i>Haliclona</i>    | <i>Haliclona (Haliclona)</i> sp. Ng4       |               | 0 | 0 | 0 | 1 | 0 | 0 |
| 485 | Demospongiae | Haplosclerida | Chalinidae      | <i>Haliclona</i>    | <i>Haliclona (Haliclona)</i> sp. Pilb1     |               | 0 | 0 | 1 | 0 | 0 | 0 |
| 486 | Demospongiae | Haplosclerida | Chalinidae      | <i>Haliclona</i>    | <i>Haliclona (Haliclona)</i> sp. SS1       |               | 0 | 0 | 1 | 0 | 0 | 0 |
| 487 | Demospongiae | Haplosclerida | Chalinidae      | <i>Haliclona</i>    | <i>Haliclona (Haliclona)?</i> sp. SS1      |               | 1 | 0 | 0 | 0 | 0 | 0 |
| 488 | Demospongiae | Haplosclerida | Chalinidae      | <i>Haliclona</i>    | <i>Haliclona (Haliclona)</i> sp. SS2       |               | 0 | 0 | 0 | 1 | 0 | 0 |
| 489 | Demospongiae | Haplosclerida | Chalinidae      | <i>Haliclona</i>    | <i>Haliclona (Haliclona)</i> sp. SS3       |               | 0 | 0 | 0 | 1 | 0 | 0 |
| 490 | Demospongiae | Haplosclerida | Chalinidae      | <i>Haliclona</i>    | <i>Haliclona (Haliclona)</i> sp. TB1       |               | 0 | 0 | 0 | 1 | 0 | 0 |
| 491 | Demospongiae | Haplosclerida | Chalinidae      | <i>Haliclona</i>    | <i>Haliclona (Haliclona)?</i> sp.          |               | 1 | 0 | 0 | 0 | 0 | 0 |
| 492 | Demospongiae | Haplosclerida | Chalinidae      | <i>Haliclona</i>    | <i>Haliclona (Reniera)</i> sp. 1           |               | 0 | 0 | 1 | 0 | 0 | 0 |
| 493 | Demospongiae | Haplosclerida | Chalinidae      | <i>Haliclona</i>    | <i>Haliclona (Reniera)</i> sp. 8           |               | 0 | 0 | 1 | 0 | 0 | 0 |

|     |              |               |            |                   |                                               |               |   |   |   |   |   |   |
|-----|--------------|---------------|------------|-------------------|-----------------------------------------------|---------------|---|---|---|---|---|---|
| 494 | Demospongiae | Haplosclerida | Chalinidae | <i>Haliclona</i>  | <i>Haliclona?</i> ( <i>Reniera</i> ) sp. 8    |               | 0 | 0 | 1 | 0 | 0 | 0 |
| 495 | Demospongiae | Haplosclerida | Chalinidae | <i>Haliclona</i>  | <i>Haliclona</i> ( <i>Reniera</i> ) 90        |               | 1 | 1 | 0 | 0 | 0 | 0 |
| 496 | Demospongiae | Haplosclerida | Chalinidae | <i>Haliclona</i>  | <i>Haliclona</i> ( <i>Reniera</i> ) 607       |               | 0 | 0 | 1 | 0 | 0 | 0 |
| 497 | Demospongiae | Haplosclerida | Chalinidae | <i>Haliclona</i>  | <i>Haliclona</i> ( <i>Reniera</i> ) 1802      |               | 1 | 0 | 0 | 0 | 0 | 0 |
| 498 | Demospongiae | Haplosclerida | Chalinidae | <i>Haliclona</i>  | <i>Haliclona</i> ( <i>Reniera</i> ) sp. CERF1 |               | 0 | 0 | 0 | 1 | 0 | 0 |
| 499 | Demospongiae | Haplosclerida | Chalinidae | <i>Haliclona</i>  | <i>Haliclona</i> ( <i>Reniera</i> ) sp. QM2   |               | 0 | 1 | 0 | 0 | 0 | 0 |
| 500 | Demospongiae | Haplosclerida | Chalinidae | <i>Haliclona</i>  | <i>Haliclona</i> ( <i>Reniera</i> ) sp. SS6   |               | 0 | 0 | 0 | 1 | 0 | 0 |
| 501 | Demospongiae | Haplosclerida | Chalinidae | <i>Haliclona</i>  | <i>Haliclona</i> ( <i>Reniera</i> ) sp. TB1   |               | 0 | 0 | 0 | 1 | 0 | 0 |
| 502 | Demospongiae | Haplosclerida | Chalinidae | <i>Haliclona</i>  | <i>Haliclona</i> sp. 4                        |               | 0 | 0 | 1 | 0 | 0 | 0 |
| 503 | Demospongiae | Haplosclerida | Chalinidae | <i>Haliclona</i>  | <i>Haliclona</i> sp. 5                        |               | 0 | 0 | 1 | 0 | 0 | 0 |
| 504 | Demospongiae | Haplosclerida | Chalinidae | <i>Haliclona</i>  | <i>Haliclona</i> sp. 6                        |               | 0 | 0 | 1 | 0 | 0 | 0 |
| 505 | Demospongiae | Haplosclerida | Chalinidae | <i>Haliclona</i>  | <i>Haliclona</i> sp. 7                        |               | 0 | 0 | 1 | 0 | 0 | 0 |
| 506 | Demospongiae | Haplosclerida | Chalinidae | <i>Haliclona</i>  | <i>Haliclona?</i> sp. 8                       |               | 0 | 0 | 1 | 0 | 0 | 0 |
| 507 | Demospongiae | Haplosclerida | Chalinidae | <i>Haliclona</i>  | <i>Haliclona?</i> sp. 9                       |               | 0 | 0 | 1 | 0 | 0 | 0 |
| 508 | Demospongiae | Haplosclerida | Chalinidae | <i>Haliclona</i>  | <i>Haliclona</i> sp. 10                       |               | 0 | 0 | 1 | 0 | 0 | 0 |
| 509 | Demospongiae | Haplosclerida | Chalinidae | <i>Haliclona</i>  | <i>Haliclona</i> sp. 11                       |               | 0 | 0 | 1 | 0 | 0 | 0 |
| 510 | Demospongiae | Haplosclerida | Chalinidae | <i>Haliclona</i>  | <i>Haliclona</i> sp. 12                       |               | 0 | 0 | 1 | 0 | 0 | 0 |
| 511 | Demospongiae | Haplosclerida | Chalinidae | <i>Haliclona</i>  | <i>Haliclona</i> sp. 13                       |               | 0 | 0 | 1 | 0 | 0 | 0 |
| 512 | Demospongiae | Haplosclerida | Chalinidae | <i>Haliclona</i>  | <i>Haliclona</i> sp. 14                       |               | 0 | 0 | 1 | 0 | 0 | 0 |
| 513 | Demospongiae | Haplosclerida | Chalinidae | <i>Haliclona</i>  | <i>Haliclona</i> sp. 15                       |               | 0 | 0 | 1 | 0 | 0 | 0 |
| 514 | Demospongiae | Haplosclerida | Chalinidae | <i>Haliclona</i>  | <i>Haliclona</i> sp. 16                       |               | 0 | 1 | 1 | 0 | 0 | 0 |
| 515 | Demospongiae | Haplosclerida | Chalinidae | <i>Haliclona</i>  | <i>Haliclona</i> sp. 17                       |               | 0 | 1 | 1 | 0 | 0 | 0 |
| 516 | Demospongiae | Haplosclerida | Chalinidae | <i>Haliclona</i>  | <i>Haliclona</i> sp. 18                       |               | 0 | 0 | 1 | 0 | 0 | 0 |
| 517 | Demospongiae | Haplosclerida | Chalinidae | <i>Haliclona</i>  | <i>Haliclona</i> sp. 19                       |               | 0 | 0 | 1 | 0 | 0 | 0 |
| 518 | Demospongiae | Haplosclerida | Chalinidae | <i>Haliclona</i>  | <i>Haliclona</i> sp. 20                       |               | 0 | 0 | 1 | 0 | 0 | 0 |
| 519 | Demospongiae | Haplosclerida | Chalinidae | <i>Haliclona</i>  | <i>Haliclona</i> sp. D1                       |               | 0 | 0 | 1 | 0 | 0 | 0 |
| 520 | Demospongiae | Haplosclerida | Chalinidae | <i>Haliclona</i>  | <i>Haliclona</i> sp. D2                       |               | 0 | 0 | 1 | 0 | 0 | 0 |
| 521 | Demospongiae | Haplosclerida | Chalinidae | <i>Haliclona</i>  | <i>Haliclona</i> sp. D3                       |               | 0 | 0 | 1 | 0 | 0 | 0 |
| 522 | Demospongiae | Haplosclerida | Chalinidae | <i>Haliclona</i>  | <i>Haliclona</i> sp. D4                       |               | 0 | 0 | 1 | 0 | 0 | 0 |
| 523 | Demospongiae | Haplosclerida | Chalinidae | <i>Haliclona</i>  | <i>Haliclona</i> sp. D5                       |               | 0 | 0 | 1 | 0 | 0 | 0 |
| 524 | Demospongiae | Haplosclerida | Chalinidae | <i>Haliclona</i>  | <i>Haliclona</i> spp.                         |               | 0 | 0 | 0 | 0 | 1 | 0 |
| 525 | Demospongiae | Haplosclerida | Niphatidae | <i>Amphimedon</i> | <i>Amphimedon lamellata</i>                   | Fromont, 1993 | 0 | 1 | 1 | 0 | 0 | 0 |
| 526 | Demospongiae | Haplosclerida | Niphatidae | <i>Amphimedon</i> | <i>Amphimedon</i> cf. <i>paraviridis</i>      | Fromont, 1993 | 0 | 1 | 1 | 1 | 0 | 0 |
| 527 | Demospongiae | Haplosclerida | Niphatidae | <i>Amphimedon</i> | <i>Amphimedon</i> sp. 1                       |               | 0 | 0 | 1 | 0 | 0 | 0 |
| 528 | Demospongiae | Haplosclerida | Niphatidae | <i>Amphimedon</i> | <i>Amphimedon</i> sp. 2                       |               | 0 | 1 | 1 | 0 | 0 | 0 |
| 529 | Demospongiae | Haplosclerida | Niphatidae | <i>Amphimedon</i> | <i>Amphimedon</i> sp. 3                       |               | 0 | 0 | 1 | 0 | 0 | 0 |
| 530 | Demospongiae | Haplosclerida | Niphatidae | <i>Amphimedon</i> | <i>Amphimedon</i> sp. 4                       |               | 0 | 0 | 1 | 0 | 0 | 0 |
| 531 | Demospongiae | Haplosclerida | Niphatidae | <i>Amphimedon</i> | <i>Amphimedon</i> 167                         |               | 1 | 1 | 0 | 0 | 0 | 0 |
| 532 | Demospongiae | Haplosclerida | Niphatidae | <i>Amphimedon</i> | <i>Amphimedon</i> 319                         |               | 1 | 1 | 0 | 0 | 0 | 0 |
| 533 | Demospongiae | Haplosclerida | Niphatidae | <i>Amphimedon</i> | <i>Amphimedon</i> 365                         |               | 1 | 1 | 0 | 0 | 0 | 0 |

|     |              |               |             |                              |                                           |                       |   |   |   |   |   |   |
|-----|--------------|---------------|-------------|------------------------------|-------------------------------------------|-----------------------|---|---|---|---|---|---|
| 534 | Demospongiae | Haplosclerida | Niphatidae  | <i>Amphimedon</i>            | <i>Amphimedon</i> 382                     |                       | 0 | 1 | 1 | 0 | 0 | 0 |
| 535 | Demospongiae | Haplosclerida | Niphatidae  | <i>Amphimedon</i>            | <i>Amphimedon</i> 695                     |                       | 0 | 0 | 1 | 0 | 0 | 0 |
| 536 | Demospongiae | Haplosclerida | Niphatidae  | <i>Amphimedon</i>            | <i>Amphimedon</i> 1789                    |                       | 1 | 0 | 0 | 0 | 0 | 0 |
| 537 | Demospongiae | Haplosclerida | Niphatidae  | <i>Amphimedon</i>            | <i>Amphimedon</i> sp. J                   |                       | 0 | 1 | 0 | 0 | 0 | 0 |
| 538 | Demospongiae | Haplosclerida | Niphatidae  | <i>Amphimedon</i>            | <i>Amphimedon</i> sp. K                   |                       | 0 | 1 | 0 | 0 | 0 | 0 |
| 539 | Demospongiae | Haplosclerida | Niphatidae  | <i>Amphimedon</i>            | <i>Amphimedon</i> sp. CERF1               |                       | 0 | 0 | 0 | 1 | 0 | 0 |
| 540 | Demospongiae | Haplosclerida | Niphatidae  | <i>Amphimedon</i>            | <i>Amphimedon</i> sp. EG1                 |                       | 0 | 0 | 1 | 0 | 0 | 0 |
| 541 | Demospongiae | Haplosclerida | Niphatidae  | <i>Amphimedon</i>            | <i>Amphimedon</i> sp. SS4                 |                       | 0 | 1 | 0 | 0 | 0 | 0 |
| 542 | Demospongiae | Haplosclerida | Niphatidae  | <i>Amphimedon</i>            | <i>Amphimedon</i> sp.                     |                       | 0 | 0 | 0 | 0 | 1 | 0 |
| 543 | Demospongiae | Haplosclerida | Niphatidae  | <i>Cribrochalina</i>         | <i>Cribrochalina compressa</i>            | (Carter, 1883)        | 0 | 1 | 0 | 0 | 0 | 0 |
| 544 | Demospongiae | Haplosclerida | Niphatidae  | <i>Cribrochalina</i>         | <i>Cribrochalina</i> 318                  |                       | 0 | 1 | 0 | 0 | 1 | 0 |
| 545 | Demospongiae | Haplosclerida | Niphatidae  | <i>Cribrochalina</i>         | <i>Cribrochalina</i> 560                  |                       | 1 | 0 | 0 | 0 | 0 | 0 |
| 546 | Demospongiae | Haplosclerida | Niphatidae  | <i>Cribrochalina</i>         | <i>Cribrochalina</i> 1293                 |                       | 1 | 1 | 0 | 0 | 0 | 0 |
| 547 | Demospongiae | Haplosclerida | Niphatidae  | <i>Gelliodes</i>             | <i>Gelloides fibulata</i>                 | (Carter, 1881)        | 0 | 0 | 1 | 1 | 0 | 0 |
| 548 | Demospongiae | Haplosclerida | Niphatidae  | <i>Gelliodes</i>             | <i>Gelliodes</i> 337                      |                       | 1 | 0 | 0 | 0 | 0 | 0 |
| 549 | Demospongiae | Haplosclerida | Niphatidae  | <i>Gelliodes</i>             | <i>Gelliodes</i> 555                      |                       | 1 | 0 | 0 | 0 | 0 | 0 |
| 550 | Demospongiae | Haplosclerida | Niphatidae  | <i>Gelliodes</i>             | <i>Gelliodes</i> 1807                     |                       | 0 | 1 | 0 | 0 | 0 | 0 |
| 551 | Demospongiae | Haplosclerida | Niphatidae  | <i>Gelliodes</i>             | <i>Gelliodes</i> sp. CERF1                |                       | 0 | 0 | 0 | 1 | 0 | 0 |
| 552 | Demospongiae | Haplosclerida | Niphatidae  | <i>Niphates</i>              | <i>Niphates</i> cf. <i>nitida</i>         | Fromont, 1993         | 0 | 0 | 1 | 0 | 0 | 0 |
| 553 | Demospongiae | Haplosclerida | Niphatidae  | <i>Niphates</i>              | <i>Niphates</i> <i>olemda</i>             | (De Laubenfels, 1954) | 1 | 1 | 1 | 0 | 0 | 0 |
| 554 | Demospongiae | Haplosclerida | Niphatidae  | <i>Niphates</i>              | <i>Niphates</i> sp. 1                     |                       | 0 | 0 | 1 | 0 | 0 | 0 |
| 555 | Demospongiae | Haplosclerida | Niphatidae  | <i>Niphates</i>              | <i>Niphates</i> sp. 2                     |                       | 0 | 0 | 1 | 0 | 0 | 0 |
| 556 | Demospongiae | Haplosclerida | Niphatidae  | <i>Niphates</i>              | <i>Niphates</i> sp. 3                     |                       | 0 | 0 | 1 | 0 | 0 | 0 |
| 557 | Demospongiae | Haplosclerida | Niphatidae  | <i>Niphates</i>              | <i>Niphates</i> 245                       |                       | 0 | 1 | 0 | 0 | 0 | 0 |
| 558 | Demospongiae | Haplosclerida | Niphatidae  | <i>Niphates</i>              | <i>Niphates</i> 282                       |                       | 0 | 1 | 0 | 0 | 0 | 0 |
| 559 | Demospongiae | Haplosclerida | Niphatidae  | <i>Niphates</i>              | <i>Niphates</i> 307                       |                       | 1 | 1 | 0 | 0 | 0 | 0 |
| 560 | Demospongiae | Haplosclerida | Niphatidae  | <i>Niphates</i>              | <i>Niphates</i> 320                       |                       | 1 | 1 | 0 | 0 | 0 | 0 |
| 561 | Demospongiae | Haplosclerida | Niphatidae  | <i>Niphates</i>              | <i>Niphates</i> 321                       |                       | 1 | 1 | 0 | 0 | 0 | 0 |
| 562 | Demospongiae | Haplosclerida | Niphatidae  | <i>Niphates</i>              | <i>Niphates</i> 1790                      |                       | 1 | 0 | 0 | 0 | 0 | 0 |
| 563 | Demospongiae | Haplosclerida | Niphatidae  | <i>Niphates</i>              | <i>Niphates</i> sp. K                     |                       | 0 | 1 | 0 | 0 | 0 | 0 |
| 564 | Demospongiae | Haplosclerida | Niphatidae  | <i>Niphates</i>              | <i>Niphates</i> sp. L                     |                       | 0 | 1 | 0 | 0 | 0 | 0 |
| 565 | Demospongiae | Haplosclerida | Niphatidae  | <i>Niphates</i>              | <i>Niphates</i> sp.                       |                       | 0 | 1 | 0 | 0 | 0 | 0 |
| 566 | Demospongiae | Haplosclerida | Petrosiidae | <i>Acanthostrongylophora</i> | <i>Acanthostrongylophora ashmorica</i>    | Hooper, 1984          | 1 | 1 | 0 | 0 | 0 | 0 |
| 567 | Demospongiae | Haplosclerida | Petrosiidae | <i>Neopetrosia</i>           | <i>Neopetrosia exigua</i>                 | (Kirkpatrick, 1900)   | 0 | 0 | 1 | 0 | 0 | 0 |
| 568 | Demospongiae | Haplosclerida | Petrosiidae | <i>Neopetrosia</i>           | <i>Neopetrosia</i> sp. CERF1              |                       | 0 | 0 | 0 | 1 | 0 | 0 |
| 569 | Demospongiae | Haplosclerida | Petrosiidae | <i>Neopetrosia</i>           | <i>Neopetrosia?</i> spp.                  |                       | 1 | 0 | 0 | 1 | 0 | 0 |
| 570 | Demospongiae | Haplosclerida | Petrosiidae | <i>Petrosia</i>              | <i>Petrosia (Petrosia) nigricans</i>      | Lindgren, 1897        | 1 | 0 | 0 | 0 | 0 | 0 |
| 571 | Demospongiae | Haplosclerida | Petrosiidae | <i>Petrosia</i>              | <i>Petrosia (Petrosia) cf. pigmentosa</i> | Fromont, 1991         | 0 | 0 | 0 | 1 | 0 | 0 |
| 572 | Demospongiae | Haplosclerida | Petrosiidae | <i>Petrosia</i>              | <i>Petrosia (Petrosia) 692</i>            |                       | 1 | 1 | 1 | 0 | 0 | 0 |
| 573 | Demospongiae | Haplosclerida | Petrosiidae | <i>Petrosia</i>              | <i>Petrosia (Petrosia) sp. B</i>          |                       | 0 | 0 | 0 | 0 | 1 | 0 |



|     |              |               |             |                     |                                                      |   |   |   |   |   |   |
|-----|--------------|---------------|-------------|---------------------|------------------------------------------------------|---|---|---|---|---|---|
| 574 | Demospongiae | Haplosclerida | Petrosiidae | <i>Petrosia</i>     | <i>Petrosia (Petrosia) sp. C</i>                     | 0 | 0 | 0 | 0 | 1 | 0 |
| 575 | Demospongiae | Haplosclerida | Petrosiidae | <i>Petrosia</i>     | <i>Petrosia (Petrosia) sp. D</i>                     | 0 | 0 | 0 | 0 | 1 | 0 |
| 576 | Demospongiae | Haplosclerida | Petrosiidae | <i>Petrosia</i>     | <i>Petrosia (Petrosia) sp. E</i>                     | 0 | 1 | 0 | 0 | 0 | 0 |
| 577 | Demospongiae | Haplosclerida | Petrosiidae | <i>Petrosia</i>     | <i>Petrosia (Petrosia) sp. F</i>                     | 0 | 1 | 0 | 0 | 0 | 0 |
| 578 | Demospongiae | Haplosclerida | Petrosiidae | <i>Petrosia</i>     | <i>Petrosia (Petrosia) sp. G</i>                     | 0 | 1 | 0 | 0 | 0 | 0 |
| 579 | Demospongiae | Haplosclerida | Petrosiidae | <i>Petrosia</i>     | <i>Petrosia (Petrosia) sp. CERF6</i>                 | 0 | 0 | 0 | 1 | 0 | 0 |
| 580 | Demospongiae | Haplosclerida | Petrosiidae | <i>Petrosia</i>     | <i>Petrosia (Petrosia) sp. Ng1</i>                   | 0 | 0 | 0 | 1 | 0 | 0 |
| 581 | Demospongiae | Haplosclerida | Petrosiidae | <i>Petrosia</i>     | <i>Petrosia (Petrosia) sp. Ng4</i>                   | 0 | 0 | 0 | 1 | 0 | 0 |
| 582 | Demospongiae | Haplosclerida | Petrosiidae | <i>Petrosia</i>     | <i>Petrosia (Petrosia) sp. SS1</i>                   | 0 | 0 | 0 | 1 | 1 | 0 |
| 583 | Demospongiae | Haplosclerida | Petrosiidae | <i>Petrosia</i>     | <i>Petrosia (Petrosia) sp. SS2</i>                   | 0 | 1 | 0 | 1 | 1 | 0 |
| 584 | Demospongiae | Haplosclerida | Petrosiidae | <i>Petrosia</i>     | <i>Petrosia (Petrosia) sp. SS4</i>                   | 1 | 1 | 0 | 0 | 0 | 0 |
| 585 | Demospongiae | Haplosclerida | Petrosiidae | <i>Petrosia</i>     | <i>Petrosia (Petrosia) spp.</i>                      | 0 | 1 | 0 | 0 | 1 | 0 |
| 586 | Demospongiae | Haplosclerida | Petrosiidae | <i>Petrosia</i>     | <i>Petrosia (Strongylophora) sp. 1</i>               | 0 | 0 | 1 | 0 | 0 | 0 |
| 587 | Demospongiae | Haplosclerida | Petrosiidae | <i>Petrosia</i>     | <i>Petrosia (Strongylophora) sp. 2</i>               | 0 | 0 | 0 | 0 | 1 | 0 |
| 588 | Demospongiae | Haplosclerida | Petrosiidae | <i>Petrosia</i>     | <i>Petrosia (Strongylophora) sp. 3</i>               | 0 | 0 | 0 | 0 | 1 | 0 |
| 589 | Demospongiae | Haplosclerida | Petrosiidae | <i>Petrosia</i>     | <i>Petrosia (Strongylophora)? sp. 4</i>              | 0 | 0 | 0 | 0 | 1 | 0 |
| 590 | Demospongiae | Haplosclerida | Petrosiidae | <i>Petrosia</i>     | <i>Petrosia (Strongylophora) sp. CERF1</i>           | 0 | 0 | 0 | 1 | 0 | 0 |
| 591 | Demospongiae | Haplosclerida | Petrosiidae | <i>Petrosia</i>     | <i>Petrosia sp. 1</i>                                | 0 | 0 | 1 | 0 | 0 | 0 |
| 592 | Demospongiae | Haplosclerida | Petrosiidae | <i>Petrosia</i>     | <i>Petrosia sp. 2</i>                                | 0 | 0 | 1 | 0 | 0 | 0 |
| 593 | Demospongiae | Haplosclerida | Petrosiidae | <i>Petrosia</i>     | <i>Petrosia sp. 3</i>                                | 0 | 0 | 1 | 0 | 0 | 0 |
| 594 | Demospongiae | Haplosclerida | Petrosiidae | <i>Petrosia</i>     | <i>Petrosia sp. 4</i>                                | 0 | 1 | 1 | 0 | 0 | 0 |
| 595 | Demospongiae | Haplosclerida | Petrosiidae | <i>Petrosia</i>     | <i>Petrosia sp. 5</i>                                | 0 | 1 | 0 | 0 | 0 | 0 |
| 596 | Demospongiae | Haplosclerida | Petrosiidae | <i>Petrosia</i>     | <i>Petrosia sp. 6</i>                                | 0 | 0 | 0 | 0 | 1 | 0 |
| 597 | Demospongiae | Haplosclerida | Petrosiidae | <i>Xestospongia</i> | <i>Xestospongia testudinaria</i> (Lamarck, 1815)     | 1 | 1 | 1 | 0 | 0 | 0 |
| 598 | Demospongiae | Haplosclerida | Petrosiidae | <i>Xestospongia</i> | <i>Xestospongia cf. testudinaria</i> (Lamarck, 1815) | 0 | 0 | 1 | 0 | 0 | 0 |
| 599 | Demospongiae | Haplosclerida | Petrosiidae | <i>Xestospongia</i> | <i>Xestospongia sp. 1</i>                            | 0 | 0 | 1 | 0 | 0 | 0 |
| 600 | Demospongiae | Haplosclerida | Petrosiidae | <i>Xestospongia</i> | <i>Xestospongia sp. 2</i>                            | 0 | 0 | 1 | 0 | 0 | 0 |
| 601 | Demospongiae | Haplosclerida | Petrosiidae | <i>Xestospongia</i> | <i>Xestospongia sp. 3</i>                            | 0 | 0 | 1 | 0 | 0 | 0 |
| 602 | Demospongiae | Haplosclerida | Petrosiidae | <i>Xestospongia</i> | <i>Xestospongia sp. 4</i>                            | 0 | 0 | 1 | 0 | 0 | 0 |
| 603 | Demospongiae | Haplosclerida | Petrosiidae | <i>Xestospongia</i> | <i>Xestospongia sp. 5</i>                            | 0 | 1 | 1 | 0 | 0 | 0 |
| 604 | Demospongiae | Haplosclerida | Petrosiidae | <i>Xestospongia</i> | <i>Xestospongia 158</i>                              | 1 | 1 | 0 | 0 | 0 | 0 |
| 605 | Demospongiae | Haplosclerida | Petrosiidae | <i>Xestospongia</i> | <i>Xestospongia 565</i>                              | 1 | 1 | 0 | 0 | 0 | 0 |
| 606 | Demospongiae | Haplosclerida | Petrosiidae | <i>Xestospongia</i> | <i>Xestospongia sp. G</i>                            | 0 | 0 | 0 | 0 | 1 | 0 |
| 607 | Demospongiae | Haplosclerida | Petrosiidae | <i>Xestospongia</i> | <i>Xestospongia sp. H</i>                            | 0 | 1 | 0 | 0 | 0 | 0 |
| 608 | Demospongiae | Haplosclerida | Petrosiidae | <i>Xestospongia</i> | <i>Xestospongia sp. I</i>                            | 0 | 1 | 0 | 0 | 0 | 0 |
| 609 | Demospongiae | Haplosclerida | Petrosiidae | <i>Xestospongia</i> | <i>Xestospongia sp. J</i>                            | 0 | 1 | 0 | 0 | 0 | 0 |
| 610 | Demospongiae | Haplosclerida | Petrosiidae | <i>Xestospongia</i> | <i>Xestospongia sp. CERF3</i>                        | 0 | 0 | 0 | 1 | 0 | 0 |
| 611 | Demospongiae | Haplosclerida | Petrosiidae | <i>Xestospongia</i> | <i>Xestospongia sp. Ng1</i>                          | 0 | 0 | 0 | 1 | 0 | 0 |
| 612 | Demospongiae | Haplosclerida | Petrosiidae | <i>Xestospongia</i> | <i>Xestospongia sp. Ng2</i>                          | 0 | 0 | 0 | 1 | 0 | 0 |
| 613 | Demospongiae | Haplosclerida | Petrosiidae | <i>Xestospongia</i> | <i>Xestospongia sp. Ng3</i>                          | 0 | 0 | 0 | 1 | 0 | 0 |

|     |              |               |                 |                     |                                                              |                        |   |   |   |   |   |   |
|-----|--------------|---------------|-----------------|---------------------|--------------------------------------------------------------|------------------------|---|---|---|---|---|---|
| 614 | Demospongiae | Haplosclerida | Petrosiidae     | <i>Xestospongia</i> | <i>Xestospongia</i> sp. Ng4                                  |                        | 0 | 0 | 0 | 1 | 0 | 0 |
| 615 | Demospongiae | Haplosclerida | Petrosiidae     | <i>Xestospongia</i> | <i>Xestospongia</i> sp. SS1                                  |                        | 0 | 0 | 0 | 1 | 0 | 0 |
| 616 | Demospongiae | Haplosclerida | Petrosiidae     | <i>Xestospongia</i> | <i>Xestospongia</i> sp. SS2                                  |                        | 0 | 0 | 0 | 1 | 0 | 1 |
| 617 | Demospongiae | Haplosclerida | Petrosiidae     | <i>Xestospongia</i> | <i>Xestospongia</i> sp. SS3                                  |                        | 0 | 0 | 0 | 1 | 0 | 0 |
| 618 | Demospongiae | Haplosclerida | Petrosiidae     | <i>Xestospongia</i> | <i>Xestospongia</i> sp. SS4                                  |                        | 0 | 0 | 0 | 1 | 0 | 0 |
| 619 | Demospongiae | Haplosclerida | Petrosiidae     | <i>Xestospongia</i> | <i>Xestospongia</i> sp. SS5                                  |                        | 0 | 1 | 0 | 0 | 0 | 0 |
| 620 | Demospongiae | Haplosclerida | Petrosiidae     | <i>Xestospongia</i> | <i>Xestospongia</i> spp.                                     |                        | 0 | 0 | 0 | 1 | 1 | 0 |
| 621 | Demospongiae | Haplosclerida | Phloeodictyidae | <i>Oceanapia</i>    | <i>Oceanapia macrotaxa</i>                                   | (Hooper, 1984)         | 0 | 0 | 1 | 1 | 0 | 0 |
| 622 | Demospongiae | Haplosclerida | Phloeodictyidae | <i>Oceanapia</i>    | <i>Oceanapia</i> cf. <i>macrotaxa</i>                        | (Hooper, 1984)         | 0 | 0 | 0 | 1 | 0 | 0 |
| 623 | Demospongiae | Haplosclerida | Phloeodictyidae | <i>Oceanapia</i>    | <i>Oceanapia amboinensis</i>                                 | Topsent, 1897          | 0 | 0 | 1 | 0 | 0 | 0 |
| 624 | Demospongiae | Haplosclerida | Phloeodictyidae | <i>Oceanapia</i>    | <i>Oceanapia ramsayi</i>                                     | (Von Lendenfeld, 1888) | 1 | 1 | 0 | 0 | 0 | 0 |
| 625 | Demospongiae | Haplosclerida | Phloeodictyidae | <i>Oceanapia</i>    | <i>Oceanapia</i> cf. <i>ramsayi</i>                          | (Von Lendenfeld, 1888) | 0 | 0 | 1 | 1 | 0 | 0 |
| 626 | Demospongiae | Haplosclerida | Phloeodictyidae | <i>Oceanapia</i>    | <i>Oceanapia</i> cf. <i>toxophila</i> = <i>Oceanapia</i> 597 |                        | 0 | 1 | 0 | 0 | 0 | 0 |
| 627 | Demospongiae | Haplosclerida | Phloeodictyidae | <i>Oceanapia</i>    | <i>Oceanapia</i> sp. 1                                       |                        | 0 | 1 | 1 | 0 | 0 | 0 |
| 628 | Demospongiae | Haplosclerida | Phloeodictyidae | <i>Oceanapia</i>    | <i>Oceanapia</i> sp. 2                                       |                        | 0 | 0 | 1 | 0 | 0 | 0 |
| 629 | Demospongiae | Haplosclerida | Phloeodictyidae | <i>Oceanapia</i>    | <i>Oceanapia</i> sp. 3                                       |                        | 0 | 0 | 1 | 0 | 0 | 0 |
| 630 | Demospongiae | Haplosclerida | Phloeodictyidae | <i>Oceanapia</i>    | <i>Oceanapia</i> sp. 4                                       |                        | 0 | 0 | 1 | 0 | 0 | 0 |
| 631 | Demospongiae | Haplosclerida | Phloeodictyidae | <i>Oceanapia</i>    | <i>Oceanapia</i> sp. 5                                       |                        | 0 | 0 | 1 | 0 | 0 | 0 |
| 632 | Demospongiae | Haplosclerida | Phloeodictyidae | <i>Oceanapia</i>    | <i>Oceanapia</i> sp. 6                                       |                        | 0 | 0 | 1 | 0 | 0 | 0 |
| 633 | Demospongiae | Haplosclerida | Phloeodictyidae | <i>Oceanapia</i>    | <i>Oceanapia</i> sp. 7                                       |                        | 0 | 0 | 1 | 0 | 0 | 0 |
| 634 | Demospongiae | Haplosclerida | Phloeodictyidae | <i>Oceanapia</i>    | <i>Oceanapia</i> sp. 8                                       |                        | 0 | 0 | 1 | 0 | 0 | 0 |
| 635 | Demospongiae | Haplosclerida | Phloeodictyidae | <i>Oceanapia</i>    | <i>Oceanapia</i> sp. 9                                       |                        | 0 | 1 | 0 | 0 | 0 | 0 |
| 636 | Demospongiae | Haplosclerida | Phloeodictyidae | <i>Oceanapia</i>    | <i>Oceanapia</i> sp. 10                                      |                        | 0 | 1 | 0 | 0 | 0 | 0 |
| 637 | Demospongiae | Haplosclerida | Phloeodictyidae | <i>Oceanapia</i>    | <i>Oceanapia</i> sp. 11                                      |                        | 0 | 0 | 0 | 0 | 1 | 0 |
| 638 | Demospongiae | Haplosclerida | Phloeodictyidae | <i>Oceanapia</i>    | <i>Oceanapia</i> sp. 12                                      |                        | 0 | 0 | 1 | 0 | 0 | 0 |
| 639 | Demospongiae | Haplosclerida | Phloeodictyidae | <i>Oceanapia</i>    | <i>Oceanapia</i> 94                                          |                        | 1 | 1 | 0 | 0 | 0 | 0 |
| 640 | Demospongiae | Haplosclerida | Phloeodictyidae | <i>Oceanapia</i>    | <i>Oceanapia</i> 135                                         |                        | 1 | 1 | 0 | 0 | 0 | 0 |
| 641 | Demospongiae | Haplosclerida | Phloeodictyidae | <i>Oceanapia</i>    | <i>Oceanapia</i> 291                                         |                        | 0 | 1 | 0 | 0 | 0 | 0 |
| 642 | Demospongiae | Haplosclerida | Phloeodictyidae | <i>Oceanapia</i>    | <i>Oceanapia</i> 303                                         |                        | 1 | 0 | 0 | 0 | 0 | 0 |
| 643 | Demospongiae | Haplosclerida | Phloeodictyidae | <i>Oceanapia</i>    | <i>Oceanapia</i> 562                                         |                        | 0 | 1 | 0 | 0 | 0 | 0 |
| 644 | Demospongiae | Haplosclerida | Phloeodictyidae | <i>Oceanapia</i>    | <i>Oceanapia</i> 563                                         |                        | 1 | 1 | 0 | 0 | 0 | 0 |
| 645 | Demospongiae | Haplosclerida | Phloeodictyidae | <i>Oceanapia</i>    | <i>Oceanapia</i> 564                                         |                        | 1 | 0 | 0 | 0 | 0 | 0 |
| 646 | Demospongiae | Haplosclerida | Phloeodictyidae | <i>Oceanapia</i>    | <i>Oceanapia</i> 716                                         |                        | 1 | 0 | 0 | 0 | 0 | 0 |
| 647 | Demospongiae | Haplosclerida | Phloeodictyidae | <i>Oceanapia</i>    | <i>Oceanapia</i> 1317                                        |                        | 0 | 1 | 0 | 0 | 0 | 0 |
| 648 | Demospongiae | Haplosclerida | Phloeodictyidae | <i>Oceanapia</i>    | <i>Oceanapia</i> 1596                                        |                        | 1 | 0 | 0 | 0 | 0 | 0 |
| 649 | Demospongiae | Haplosclerida | Phloeodictyidae | <i>Oceanapia</i>    | <i>Oceanapia</i> sp. D                                       |                        | 0 | 0 | 0 | 0 | 1 | 0 |
| 650 | Demospongiae | Haplosclerida | Phloeodictyidae | <i>Oceanapia</i>    | <i>Oceanapia</i> sp. E                                       |                        | 0 | 1 | 0 | 0 | 0 | 0 |
| 651 | Demospongiae | Haplosclerida | Phloeodictyidae | <i>Oceanapia</i>    | <i>Oceanapia</i> sp. F                                       |                        | 0 | 1 | 0 | 0 | 0 | 0 |
| 652 | Demospongiae | Haplosclerida | Phloeodictyidae | <i>Oceanapia</i>    | <i>Oceanapia</i> sp. CERF2                                   |                        | 0 | 0 | 0 | 1 | 0 | 0 |
| 653 | Demospongiae | Haplosclerida | Phloeodictyidae | <i>Oceanapia</i>    | <i>Oceanapia</i> sp. CERF5                                   |                        | 0 | 0 | 0 | 1 | 0 | 0 |

|     |              |                 |                 |                       |                                       |                        |   |   |   |   |   |   |
|-----|--------------|-----------------|-----------------|-----------------------|---------------------------------------|------------------------|---|---|---|---|---|---|
| 654 | Demospongiae | Haplosclerida   | Phloeodictyidae | <i>Oceanapia</i>      | <i>Oceanapia</i> sp. CERF6            |                        | 0 | 0 | 0 | 1 | 0 | 0 |
| 655 | Demospongiae | Haplosclerida   | Phloeodictyidae | <i>Oceanapia</i>      | <i>Oceanapia</i> sp. CERF9            |                        | 0 | 0 | 0 | 1 | 0 | 0 |
| 656 | Demospongiae | Haplosclerida   | Phloeodictyidae | <i>Oceanapia</i>      | <i>Oceanapia</i> sp. Ng1              |                        | 1 | 1 | 0 | 1 | 1 | 0 |
| 657 | Demospongiae | Haplosclerida   | Phloeodictyidae | <i>Oceanapia</i>      | <i>Oceanapia</i> sp. Ng2              |                        | 0 | 0 | 0 | 1 | 0 | 0 |
| 658 | Demospongiae | Haplosclerida   | Phloeodictyidae | <i>Oceanapia</i>      | <i>Oceanapia</i> sp. Ng3              |                        | 0 | 0 | 0 | 1 | 0 | 0 |
| 659 | Demospongiae | Haplosclerida   | Phloeodictyidae | <i>Oceanapia</i>      | <i>Oceanapia</i> sp. Ng4              |                        | 0 | 0 | 0 | 1 | 0 | 0 |
| 660 | Demospongiae | Haplosclerida   | Phloeodictyidae | <i>Oceanapia</i>      | <i>Oceanapia</i> sp. Ng5              |                        | 0 | 0 | 0 | 1 | 0 | 0 |
| 661 | Demospongiae | Haplosclerida   | Phloeodictyidae | <i>Oceanapia</i>      | <i>Oceanapia</i> sp. NR1              |                        | 0 | 0 | 0 | 1 | 0 | 0 |
| 662 | Demospongiae | Haplosclerida   | Phloeodictyidae | <i>Oceanapia</i>      | <i>Oceanapia</i> sp. Pilb1            |                        | 0 | 0 | 1 | 0 | 0 | 0 |
| 663 | Demospongiae | Haplosclerida   | Phloeodictyidae | <i>Oceanapia</i>      | <i>Oceanapia</i> sp. SS1              |                        | 0 | 0 | 0 | 0 | 1 | 0 |
| 664 | Demospongiae | Haplosclerida   | Phloeodictyidae | <i>Oceanapia</i>      | <i>Oceanapia</i> sp. SS2              |                        | 0 | 0 | 0 | 0 | 1 | 0 |
| 665 | Demospongiae | Haplosclerida   | Phloeodictyidae | <i>Oceanapia</i>      | <i>Oceanapia</i> sp. SS3              |                        | 0 | 0 | 0 | 1 | 0 | 0 |
| 666 | Demospongiae | Haplosclerida   | Phloeodictyidae | <i>Oceanapia</i>      | <i>Oceanapia</i> sp. SS4              |                        | 0 | 1 | 0 | 1 | 0 | 0 |
| 667 | Demospongiae | Haplosclerida   | Phloeodictyidae | <i>Oceanapia</i>      | <i>Oceanapia</i> sp. SS5              |                        | 0 | 1 | 0 | 0 | 0 | 0 |
| 668 | Demospongiae | Haplosclerida   | Phloeodictyidae | <i>Oceanapia</i>      | <i>Oceanapia</i> sp. SS8              |                        | 0 | 0 | 0 | 1 | 0 | 0 |
| 669 | Demospongiae | Haplosclerida   | Phloeodictyidae | <i>Oceanapia</i>      | <i>Oceanapia</i> sp. SS10             |                        | 0 | 1 | 0 | 0 | 0 | 0 |
| 670 | Demospongiae | Haplosclerida   | Phloeodictyidae | <i>Oceanapia</i>      | <i>Oceanapia</i> sp. SS12             |                        | 0 | 1 | 0 | 0 | 0 | 0 |
| 671 | Demospongiae | Haplosclerida   | Phloeodictyidae | <i>Oceanapia</i>      | <i>Oceanapia</i> sp. SS13             |                        | 0 | 1 | 0 | 1 | 0 | 0 |
| 672 | Demospongiae | Haplosclerida   | Phloeodictyidae | <i>Siphonodictyon</i> | <i>Siphonodictyon</i> sp. 2           |                        | 0 | 0 | 1 | 0 | 0 | 0 |
| 673 | Demospongiae | Haplosclerida   | Phloeodictyidae | <i>Siphonodictyon</i> | <i>Siphonodictyon?</i> sp. 3          |                        | 0 | 0 | 1 | 0 | 0 | 0 |
| 674 | Demospongiae | Haplosclerida   | Phloeodictyidae | <i>Siphonodictyon</i> | <i>Siphonodictyon</i> sp. 4           |                        | 0 | 0 | 1 | 0 | 0 | 0 |
| 675 | Demospongiae | Haplosclerida   | Phloeodictyidae | <i>Siphonodictyon</i> | <i>Siphonodictyon</i> sp. 5           |                        | 0 | 0 | 1 | 0 | 0 | 0 |
| 676 | Demospongiae | Haplosclerida   | Phloeodictyidae | <i>Siphonodictyon</i> | <i>Siphonodictyon</i> 323             |                        | 1 | 0 | 0 | 0 | 0 | 0 |
| 677 | Demospongiae | Haplosclerida   | Phloeodictyidae | <i>Siphonodictyon</i> | <i>Siphonodictyon</i> 331             |                        | 1 | 0 | 0 | 0 | 0 | 0 |
| 678 | Demospongiae | Haplosclerida   | Phloeodictyidae | <i>Siphonodictyon</i> | <i>Siphonodictyon</i> 332             |                        | 0 | 1 | 0 | 0 | 0 | 0 |
| 679 | Demospongiae | Haplosclerida   | Phloeodictyidae | <i>Siphonodictyon</i> | <i>Siphonodictyon</i> sp. H           |                        | 0 | 1 | 0 | 0 | 0 | 0 |
| 680 | Demospongiae | Haplosclerida   | Phloeodictyidae | <i>Siphonodictyon</i> | <i>Siphonodictyon</i> sp. I           |                        | 0 | 1 | 0 | 0 | 0 | 0 |
| 681 | Demospongiae | Haplosclerida   | Phloeodictyidae | <i>Siphonodictyon</i> | <i>Siphonodictyon</i> sp. CERF1       |                        | 0 | 0 | 0 | 1 | 0 | 0 |
| 682 | Demospongiae | Haplosclerida   | Phloeodictyidae | <i>Siphonodictyon</i> | <i>Siphonodictyon</i> sp. CERF2       |                        | 0 | 0 | 0 | 1 | 0 | 0 |
| 683 | Demospongiae | Haplosclerida   | Phloeodictyidae | <i>Siphonodictyon</i> | <i>Siphonodictyon</i> sp. CERF4       |                        | 0 | 0 | 0 | 1 | 0 | 0 |
| 684 | Demospongiae | Haplosclerida   | Phloeodictyidae | <i>Siphonodictyon</i> | <i>Siphonodictyon</i> sp. CERF6       |                        | 0 | 0 | 0 | 1 | 0 | 0 |
| 685 | Demospongiae | Haplosclerida   | Phloeodictyidae | <i>Siphonodictyon</i> | <i>Siphonodictyon</i> sp. NR1         |                        | 0 | 0 | 0 | 1 | 0 | 0 |
| 686 | Demospongiae | Haplosclerida   | Phloeodictyidae | <i>Siphonodictyon</i> | <i>Siphonodictyon</i> sp. SS1         |                        | 0 | 0 | 0 | 1 | 0 | 0 |
| 687 | Demospongiae | Haplosclerida   | Phloeodictyidae | <i>Siphonodictyon</i> | <i>Siphonodictyon</i> sp. SS3         |                        | 0 | 1 | 0 | 0 | 0 | 0 |
| 688 | Demospongiae | Haplosclerida   | Phloeodictyidae | <i>Siphonodictyon</i> | <i>Siphonodictyon</i> sp. SS7         |                        | 0 | 1 | 0 | 1 | 0 | 0 |
| 689 | Demospongiae | Haplosclerida   | Phloeodictyidae | <i>Siphonodictyon</i> | <i>Siphonodictyon</i> sp. SS8         |                        | 0 | 0 | 0 | 1 | 0 | 0 |
| 691 | Demospongiae | Haplosclerida   | Phloeodictyidae | <i>Siphonodictyon</i> | <i>Siphonodictyon</i> sp. TB1         |                        | 0 | 0 | 0 | 1 | 0 | 0 |
| 691 | Demospongiae | Merliida        | Hamacanthidae   | <i>Hamacantha</i>     | <i>Hamacantha</i> spp.                |                        | 0 | 0 | 0 | 0 | 1 | 0 |
| 692 | Demospongiae | Poecilosclerida | Acarnidae       | <i>Acarnus</i>        | <i>Acarnus</i> cf. <i>bergquistae</i> | Van Soest et al., 1991 | 0 | 0 | 1 | 0 | 0 | 0 |
| 693 | Demospongiae | Poecilosclerida | Acarnidae       | <i>Acarnus</i>        | <i>Acarnus wolffgangi</i>             | Keller, 1889           | 0 | 0 | 1 | 0 | 0 | 0 |

|     |              |                 |                 |                       |                                                                                                        |                    |   |   |   |   |   |   |
|-----|--------------|-----------------|-----------------|-----------------------|--------------------------------------------------------------------------------------------------------|--------------------|---|---|---|---|---|---|
| 694 | Demospongiae | Poecilosclerida | Acarnidae       | <i>lophon</i>         | <i>lophon</i> sp. 10                                                                                   |                    | 0 | 1 | 0 | 0 | 0 | 0 |
| 695 | Demospongiae | Poecilosclerida | Acarnidae       | <i>Paracornulum</i>   | <i>Paracornulum strepsichela</i>                                                                       | (Dendy, 1922)      | 0 | 0 | 1 | 0 | 0 | 0 |
| 696 | Demospongiae | Poecilosclerida | Acarnidae       | <i>Zyzzya</i>         | <i>Zyzzya</i> sp. CERF2                                                                                |                    | 0 | 0 | 0 | 1 | 0 | 0 |
| 697 | Demospongiae | Poecilosclerida | Acarnidae       | <i>Zyzzya</i>         | <i>Zyzzya</i> sp. Ng1                                                                                  |                    | 0 | 0 | 0 | 0 | 1 | 1 |
| 698 | Demospongiae | Poecilosclerida | Acarnidae       | <i>Zyzzya</i>         | <i>Zyzzya</i> sp.                                                                                      |                    | 0 | 0 | 0 | 1 | 0 | 0 |
| 699 | Demospongiae | Poecilosclerida | Chondropsidae   | <i>Chondropsis</i>    | <i>Chondropsis</i> sp. 1                                                                               |                    | 0 | 0 | 1 | 0 | 0 | 0 |
| 700 | Demospongiae | Poecilosclerida | Chondropsidae   | <i>Chondropsis</i>    | <i>Chondropsis</i> sp. GN1                                                                             |                    | 0 | 0 | 0 | 1 | 0 | 0 |
| 701 | Demospongiae | Poecilosclerida | Chondropsidae   | <i>Chondropsis</i>    | <i>Chondropsis</i> sp. Ng2                                                                             |                    | 0 | 0 | 0 | 0 | 0 | 1 |
| 702 | Demospongiae | Poecilosclerida | Chondropsidae   | <i>Phoriospongia</i>  | <i>Phoriospongia</i> sp. 1                                                                             |                    | 0 | 0 | 1 | 0 | 0 | 0 |
| 703 | Demospongiae | Poecilosclerida | Chondropsidae   | <i>Phoriospongia</i>  | <i>Phoriospongia?</i> sp. 1                                                                            |                    | 0 | 0 | 1 | 0 | 0 | 0 |
| 704 | Demospongiae | Poecilosclerida | Chondropsidae   | <i>Phoriospongia</i>  | <i>Phoriospongia</i> sp. 2                                                                             |                    | 0 | 0 | 1 | 0 | 0 | 0 |
| 705 | Demospongiae | Poecilosclerida | Chondropsidae   | <i>Phoriospongia</i>  | <i>Phoriospongia</i> 293                                                                               |                    | 1 | 0 | 0 | 0 | 0 | 0 |
| 706 | Demospongiae | Poecilosclerida | Chondropsidae   | <i>Phoriospongia</i>  | <i>Phoriospongia</i> sp. Ng1                                                                           |                    | 0 | 0 | 0 | 1 | 0 | 0 |
| 707 | Demospongiae | Poecilosclerida | Chondropsidae   | <i>Phoriospongia</i>  | <i>Phoriospongia</i> sp. SS1                                                                           |                    | 1 | 1 | 0 | 0 | 0 | 0 |
| 708 | Demospongiae | Poecilosclerida | Chondropsidae   | <i>Psammoclema</i>    | <i>Psammoclema densum</i>                                                                              | (Marshall, 1880)   | 1 | 0 | 0 | 0 | 0 | 0 |
| 709 | Demospongiae | Poecilosclerida | Chondropsidae   | <i>Psammoclema</i>    | <i>Psammoclema</i> sp. 1                                                                               |                    | 0 | 0 | 1 | 0 | 0 | 0 |
| 710 | Demospongiae | Poecilosclerida | Chondropsidae   | <i>Psammoclema</i>    | <i>Psammoclema</i> 248                                                                                 |                    | 1 | 1 | 0 | 0 | 0 | 0 |
| 711 | Demospongiae | Poecilosclerida | Chondropsidae   | <i>Psammoclema</i>    | <i>Psammoclema</i> sp. Ng1                                                                             |                    | 0 | 0 | 0 | 1 | 0 | 1 |
| 712 | Demospongiae | Poecilosclerida | Chondropsidae   | <i>Psammoclema</i>    | cf. <i>Psammoclema</i> sp.                                                                             |                    | 0 | 0 | 0 | 1 | 0 | 0 |
| 713 | Demospongiae | Poecilosclerida | Chondropsidae   | <i>Strongylacidon</i> | <i>Strongylacidon</i> sp. SS1                                                                          |                    | 0 | 1 | 1 | 0 | 0 | 0 |
| 714 | Demospongiae | Poecilosclerida | Chondropsidae   | <i>Strongylacidon</i> | <i>Strongylacidon</i> sp. SS3                                                                          |                    | 0 | 1 | 0 | 0 | 0 | 0 |
| 715 | Demospongiae | Poecilosclerida | Coelosphaeridae | <i>Coelosphaera</i>   | <i>Coelosphaera</i> ( <i>Coelosph.</i> ) sp. CERF4                                                     |                    | 0 | 0 | 0 | 1 | 0 | 0 |
| 716 | Demospongiae | Poecilosclerida | Coelosphaeridae | <i>Coelosphaera</i>   | <i>Coelosphaera</i> ( <i>Coelosph.</i> ) sp. Ng1                                                       |                    | 0 | 0 | 0 | 1 | 0 | 0 |
| 717 | Demospongiae | Poecilosclerida | Coelosphaeridae | <i>Coelosphaera</i>   | <i>Coelosphaera</i> ( <i>Coelosph.</i> ) sp. SS3                                                       |                    | 0 | 0 | 0 | 1 | 0 | 1 |
| 718 | Demospongiae | Poecilosclerida | Coelosphaeridae | <i>Coelosphaera</i>   | <i>Coelosphaera</i> ( <i>Coelosph.</i> ) sp. SS8                                                       |                    | 0 | 0 | 0 | 1 | 0 | 0 |
| 719 | Demospongiae | Poecilosclerida | Coelosphaeridae | <i>Coelosphaera</i>   | <i>Coelosphaera</i> sp. 1                                                                              |                    | 0 | 0 | 1 | 0 | 0 | 0 |
| 720 | Demospongiae | Poecilosclerida | Coelosphaeridae | <i>Coelosphaera</i>   | <i>Coelosphaera</i> 469                                                                                |                    | 1 | 0 | 0 | 0 | 0 | 0 |
| 721 | Demospongiae | Poecilosclerida | Coelosphaeridae | <i>Coelosphaera</i>   | <i>Coelosphaera</i> 1035                                                                               |                    | 0 | 1 | 0 | 0 | 0 | 0 |
| 722 | Demospongiae | Poecilosclerida | Coelosphaeridae | <i>Coelosphaera</i>   | <i>Coelosphaera</i> 1299                                                                               |                    | 1 | 0 | 0 | 0 | 0 | 0 |
| 723 | Demospongiae | Poecilosclerida | Coelosphaeridae | <i>Forcepia</i>       | <i>Forcepia</i> ( <i>Forcepia</i> ) sp. CERF1                                                          |                    | 0 | 0 | 0 | 1 | 0 | 0 |
| 724 | Demospongiae | Poecilosclerida | Coelosphaeridae | <i>Forcepia</i>       | <i>Forcepia</i> sp.                                                                                    |                    | 0 | 0 | 0 | 0 | 1 | 0 |
| 725 | Demospongiae | Poecilosclerida | Coelosphaeridae | <i>Histodermella</i>  | <i>Histodermella</i> sp. SS1                                                                           |                    | 0 | 1 | 0 | 0 | 0 | 0 |
| 726 | Demospongiae | Poecilosclerida | Coelosphaeridae | <i>Lissodendoryx</i>  | <i>Lissodendoryx</i> ( <i>Ectyodoryx</i> ) <i>maculata</i>                                             | Hentschel, 1911    | 0 | 1 | 0 | 0 | 0 | 0 |
| 727 | Demospongiae | Poecilosclerida | Coelosphaeridae | <i>Lissodendoryx</i>  | <i>Lissodendoryx</i> ( <i>Ectyodoryx</i> ) sp. 1                                                       |                    | 0 | 0 | 1 | 0 | 0 | 0 |
| 728 | Demospongiae | Poecilosclerida | Coelosphaeridae | <i>Lissodendoryx</i>  | <i>Lissodendoryx</i> ( <i>Lissodendoryx</i> ) 489, cf. <i>Tedania</i> ( <i>Tedania</i> ) <i>aspera</i> | (Bowerbank, 12875) | 0 | 1 | 0 | 0 | 0 | 0 |
| 729 | Demospongiae | Poecilosclerida | Crambeidae      | <i>Monanchora</i>     | <i>Monanchora</i> cf. <i>clathrata</i>                                                                 | Carter, 1883       | 0 | 0 | 0 | 1 | 0 | 0 |
| 730 | Demospongiae | Poecilosclerida | Crambeidae      | <i>Monanchora</i>     | <i>Monanchora</i> 605                                                                                  |                    | 1 | 1 | 0 | 0 | 0 | 0 |
| 731 | Demospongiae | Poecilosclerida | Crambeidae      | <i>Monanchora</i>     | <i>Monanchora</i> sp. Ng1                                                                              |                    | 0 | 1 | 0 | 1 | 0 | 1 |
| 732 | Demospongiae | Poecilosclerida | Crellidae       | <i>Crella</i>         | <i>Crella</i> ( <i>Crella</i> ) sp. SS2                                                                |                    | 0 | 0 | 0 | 1 | 0 | 0 |

|     |              |                 |                 |                      |                                     |                      |   |   |   |   |   |   |
|-----|--------------|-----------------|-----------------|----------------------|-------------------------------------|----------------------|---|---|---|---|---|---|
| 733 | Demospongiae | Poecilosclerida | Crellidae       | <i>Crella</i>        | <i>Crella (Grayella) sp.</i> EG1    |                      | 0 | 0 | 1 | 0 | 0 | 0 |
| 734 | Demospongiae | Poecilosclerida | Crellidae       | <i>Crella</i>        | <i>Crella (Yvesia) spinulata</i>    | (Hentschel, 1911)    | 1 | 1 | 0 | 1 | 0 | 0 |
| 735 | Demospongiae | Poecilosclerida | Crellidae       | <i>Crella</i>        | <i>Crella (Yvesia) sp.</i> 1        |                      | 0 | 0 | 1 | 0 | 0 | 0 |
| 736 | Demospongiae | Poecilosclerida | Crellidae       | <i>Crella</i>        | <i>Crella (Yvesia) sp.</i> Ng1      |                      | 0 | 0 | 0 | 0 | 0 | 1 |
| 737 | Demospongiae | Poecilosclerida | Crellidae       | <i>Crella</i>        | <i>Crella (Yvesia) sp.</i> SS1      |                      | 0 | 0 | 0 | 1 | 0 | 0 |
| 738 | Demospongiae | Poecilosclerida | Crellidae       | <i>Crella</i>        | <i>Crella (Yvesia) sp.</i> SS2      |                      | 0 | 0 | 0 | 1 | 0 | 1 |
| 739 | Demospongiae | Poecilosclerida | Crellidae       | <i>Crella</i>        | <i>Crella sp.</i> 1                 |                      | 0 | 0 | 0 | 1 | 0 | 0 |
| 740 | Demospongiae | Poecilosclerida | Dendoricellidae | <i>Fibulia</i>       | <i>Fibulia?</i> sp. SS1             |                      | 0 | 0 | 0 | 1 | 0 | 0 |
| 741 | Demospongiae | Poecilosclerida | Desmacellidae   | <i>Desmacella</i>    | <i>Desmacella ithystela</i>         | Hooper, 1984         | 0 | 1 | 0 | 0 | 0 | 0 |
| 742 | Demospongiae | Poecilosclerida | Desmacellidae   | <i>Desmacella</i>    | <i>Desmacella sp.</i> Ng1           |                      | 0 | 0 | 0 | 1 | 0 | 0 |
| 743 | Demospongiae | Poecilosclerida | Desmacididae    | <i>Desmacidon</i>    | <i>Desmacidon sp.</i> 1             |                      | 0 | 1 | 1 | 0 | 0 | 0 |
| 744 | Demospongiae | Poecilosclerida | Desmacididae    | <i>Desmacidon</i>    | <i>Desmacidon</i> 255               |                      | 1 | 1 | 0 | 0 | 0 | 0 |
| 745 | Demospongiae | Poecilosclerida | Desmacididae    | <i>Desmapsamma</i>   | <i>Desmapsamma verooorti</i>        | Van Soest, 1998      | 0 | 0 | 1 | 0 | 0 | 0 |
| 746 | Demospongiae | Poecilosclerida | Desmacididae    | <i>Desmapsamma</i>   | <i>Desmapsamma sp.</i> 1            |                      | 0 | 0 | 1 | 0 | 0 | 0 |
| 747 | Demospongiae | Poecilosclerida | Desmacididae    | <i>Desmapsamma</i>   | <i>Desmapsamma?</i> sp. 2           |                      | 0 | 0 | 0 | 1 | 0 | 0 |
| 748 | Demospongiae | Poecilosclerida | Desmacididae    | <i>Desmapsamma</i>   | <i>Desmapsamma</i> 241              |                      | 1 | 1 | 0 | 0 | 0 | 0 |
| 749 | Demospongiae | Poecilosclerida | Desmacididae    | <i>Desmapsamma</i>   | <i>Desmapsamma</i> 289              |                      | 0 | 1 | 0 | 0 | 0 | 0 |
| 750 | Demospongiae | Poecilosclerida | Desmacididae    | <i>Desmapsamma</i>   | <i>Desmapsamma</i> 328              |                      | 0 | 1 | 0 | 0 | 0 | 0 |
| 751 | Demospongiae | Poecilosclerida | Desmacididae    | <i>Desmapsamma</i>   | <i>Desmapsamma</i> 759              |                      | 0 | 1 | 0 | 0 | 0 | 0 |
| 752 | Demospongiae | Poecilosclerida | Desmacididae    | <i>Desmapsamma</i>   | <i>Desmapsamma</i> 1746             |                      | 0 | 1 | 0 | 0 | 0 | 0 |
| 753 | Demospongiae | Poecilosclerida | Esperiopsidae   | <i>Esperiopsis</i>   | <i>Esperiopsis</i> 48               |                      | 0 | 1 | 0 | 0 | 1 | 0 |
| 754 | Demospongiae | Poecilosclerida | Guitarridae     | <i>Guitarra</i>      | <i>Guitarra cf. indica</i>          | Dendy, 1916          | 0 | 0 | 0 | 1 | 0 | 0 |
| 755 | Demospongiae | Poecilosclerida | Guitarridae     | <i>Guitarra</i>      | <i>Guitarra sp.</i>                 |                      | 0 | 0 | 0 | 1 | 0 | 0 |
| 756 | Demospongiae | Poecilosclerida | Guitarridae     | <i>Tetrapocillon</i> | <i>Tetrapocillon patbergquistae</i> | Fromont et al., 2011 | 0 | 0 | 1 | 0 | 0 | 0 |
| 757 | Demospongiae | Poecilosclerida | Hymedesmiidae   | <i>Hymedesmia</i>    | <i>Hymedesmia sp.</i> 1             |                      | 0 | 0 | 1 | 0 | 0 | 0 |
| 758 | Demospongiae | Poecilosclerida | Hymedesmiidae   | <i>Hymedesmia</i>    | <i>Hymedesmia sp.</i>               |                      | 0 | 0 | 0 | 0 | 1 | 0 |
| 759 | Demospongiae | Poecilosclerida | Hymedesmiidae   | <i>Phorbas</i>       | <i>Phorbas sp.</i> 1                |                      | 0 | 0 | 1 | 0 | 0 | 0 |
| 760 | Demospongiae | Poecilosclerida | Hymedesmiidae   | <i>Phorbas</i>       | <i>Phorbas</i> 713                  |                      | 0 | 1 | 1 | 0 | 0 | 0 |
| 761 | Demospongiae | Poecilosclerida | Hymedesmiidae   | <i>Phorbas</i>       | <i>Phorbas</i> 1259                 |                      | 0 | 1 | 0 | 0 | 0 | 0 |
| 762 | Demospongiae | Poecilosclerida | Hymedesmiidae   | <i>Phorbas</i>       | <i>Phorbas</i> 1670                 |                      | 0 | 0 | 1 | 0 | 0 | 0 |
| 763 | Demospongiae | Poecilosclerida | Hymedesmiidae   | <i>Phorbas</i>       | <i>Phorbas sp.</i> Ng1              |                      | 0 | 0 | 0 | 1 | 0 | 0 |
| 764 | Demospongiae | Poecilosclerida | Hymedesmiidae   | <i>Phorbas</i>       | <i>Phorbas sp.</i> SS1              |                      | 0 | 1 | 0 | 0 | 0 | 0 |
| 765 | Demospongiae | Poecilosclerida | Hymedesmiidae   | <i>Phorbas</i>       | <i>Phorbas spp.</i>                 |                      | 0 | 1 | 0 | 1 | 0 | 0 |
| 766 | Demospongiae | Poecilosclerida | Ietrochotidae   | <i>Ietrochota</i>    | <i>Ietrochota acerata</i>           | Deny, 1896           | 0 | 1 | 0 | 1 | 0 | 0 |
| 767 | Demospongiae | Poecilosclerida | Ietrochotidae   | <i>Ietrochota</i>    | <i>Ietrochota cf. acerata</i>       | Deny, 1896           | 0 | 0 | 1 | 1 | 1 | 0 |
| 768 | Demospongiae | Poecilosclerida | Ietrochotidae   | <i>Ietrochota</i>    | <i>Ietrochota baculifera</i>        | Ridley, 1884         | 1 | 1 | 1 | 0 | 0 | 0 |
| 769 | Demospongiae | Poecilosclerida | Ietrochotidae   | <i>Ietrochota</i>    | <i>Ietrochota cf. baculifera</i>    | Ridley, 1884         | 0 | 0 | 0 | 1 | 0 | 1 |
| 770 | Demospongiae | Poecilosclerida | Ietrochotidae   | <i>Ietrochota</i>    | <i>Ietrochota cf. coccinea</i>      | (Carter, 1886)       | 0 | 0 | 0 | 1 | 0 | 0 |
| 771 | Demospongiae | Poecilosclerida | Ietrochotidae   | <i>Ietrochota</i>    | <i>Ietrochota cf. purpurea</i>      | (Bowerbank, 1875)    | 0 | 0 | 1 | 0 | 0 | 0 |
| 772 | Demospongiae | Poecilosclerida | Ietrochotidae   | <i>Ietrochota</i>    | <i>Ietrochota sp.</i> 1             |                      | 0 | 1 | 1 | 0 | 0 | 0 |

|     |              |                 |                |                       |                                              |                      |   |   |   |   |   |   |
|-----|--------------|-----------------|----------------|-----------------------|----------------------------------------------|----------------------|---|---|---|---|---|---|
| 773 | Demospongiae | Poecilosclerida | Iotrochotidae  | <i>Iotrochota</i>     | <i>Iotrochota</i> sp. 2                      |                      | 0 | 0 | 1 | 0 | 0 | 0 |
| 774 | Demospongiae | Poecilosclerida | Iotrochotidae  | <i>Iotrochota</i>     | <i>Iotrochota</i> 377                        |                      | 1 | 0 | 0 | 0 | 0 | 0 |
| 775 | Demospongiae | Poecilosclerida | Iotrochotidae  | <i>Iotrochota</i>     | <i>Iotrochota</i> 701                        |                      | 0 | 1 | 0 | 0 | 0 | 0 |
| 776 | Demospongiae | Poecilosclerida | Iotrochotidae  | <i>Iotrochota</i>     | <i>Iotrochota</i> sp. Ng1                    |                      | 0 | 0 | 0 | 1 | 0 | 0 |
| 777 | Demospongiae | Poecilosclerida | Isodictyiidae  | <i>Coelocartheria</i> | <i>Coelocartheria singaporensis</i>          | (Carter, 1883)       | 0 | 0 | 1 | 0 | 0 | 0 |
| 778 | Demospongiae | Poecilosclerida | Latrunculiidae | <i>Latrunculia</i>    | <i>Latrunculia</i> sp. SS1                   |                      | 0 | 1 | 0 | 1 | 0 | 0 |
| 779 | Demospongiae | Poecilosclerida | Latrunculiidae | <i>Sceptrella</i>     | <i>Sceptrella</i> sp. SS1                    |                      | 0 | 0 | 0 | 0 | 0 | 1 |
| 780 | Demospongiae | Poecilosclerida | Latrunculiidae | <i>Sceptrella</i>     | <i>Sceptrella</i> sp. SS2                    |                      | 0 | 0 | 0 | 1 | 0 | 0 |
| 781 | Demospongiae | Poecilosclerida | Microcionidae  | <i>Antho</i>          | <i>Antho (Antho) tuberosa</i>                | (Hentschel, 1911)    | 0 | 1 | 0 | 0 | 0 | 0 |
| 782 | Demospongiae | Poecilosclerida | Microcionidae  | <i>Antho</i>          | <i>Antho (Antho) sp. SS1</i>                 |                      | 1 | 0 | 0 | 0 | 0 | 0 |
| 783 | Demospongiae | Poecilosclerida | Microcionidae  | <i>Antho</i>          | <i>Antho (Acarinia) cf. frondifera</i>       | (Lamarck, 1814)      | 0 | 0 | 1 | 0 | 0 | 0 |
| 784 | Demospongiae | Poecilosclerida | Microcionidae  | <i>Clathria</i>       | <i>Clathria (Axosuberites) patula</i>        | (Hooper, 1996)       | 0 | 1 | 0 | 0 | 0 | 0 |
| 785 | Demospongiae | Poecilosclerida | Microcionidae  | <i>Clathria</i>       | <i>Clathria (Clathria) basilana</i>          | Lévi, 1961           | 0 | 1 | 0 | 0 | 0 | 0 |
| 786 | Demospongiae | Poecilosclerida | Microcionidae  | <i>Clathria</i>       | <i>Clathria (Clathria) sp. 3</i>             |                      | 0 | 1 | 0 | 0 | 0 | 0 |
| 787 | Demospongiae | Poecilosclerida | Microcionidae  | <i>Clathria</i>       | <i>Clathria (Clathria) sp. SS2</i>           |                      | 0 | 0 | 0 | 1 | 0 | 0 |
| 788 | Demospongiae | Poecilosclerida | Microcionidae  | <i>Clathria</i>       | <i>Clathria (Dendrocia) sp. 4</i>            |                      | 0 | 1 | 0 | 0 | 0 | 0 |
| 789 | Demospongiae | Poecilosclerida | Microcionidae  | <i>Clathria</i>       | <i>Clathria (Isociella) eccentrica</i>       | (Burton, 1934)       | 0 | 0 | 1 | 0 | 0 | 0 |
| 790 | Demospongiae | Poecilosclerida | Microcionidae  | <i>Clathria</i>       | <i>Clathria (Microciona) aceratoobtusata</i> | (Carter, 1887)       | 0 | 0 | 1 | 0 | 0 | 0 |
| 791 | Demospongiae | Poecilosclerida | Microcionidae  | <i>Clathria</i>       | <i>Clathria (Microciona) cf. lizardensis</i> | Hooper, 1996         | 0 | 0 | 1 | 0 | 0 | 0 |
| 792 | Demospongiae | Poecilosclerida | Microcionidae  | <i>Clathria</i>       | <i>Clathria (Microciona) sp. 2</i>           |                      | 0 | 0 | 1 | 0 | 0 | 0 |
| 793 | Demospongiae | Poecilosclerida | Microcionidae  | <i>Clathria</i>       | <i>Clathria (Microciona) sp. 3</i>           |                      | 0 | 0 | 1 | 0 | 0 | 0 |
| 794 | Demospongiae | Poecilosclerida | Microcionidae  | <i>Clathria</i>       | <i>Clathria (Thalysias) abietina</i>         | (Lamarck, 1814)      | 1 | 1 | 1 | 1 | 1 | 0 |
| 795 | Demospongiae | Poecilosclerida | Microcionidae  | <i>Clathria</i>       | <i>Clathria (Thalysias) cactiformis</i>      | (Lamarck, 1814)      | 1 | 1 | 1 | 1 | 0 | 0 |
| 796 | Demospongiae | Poecilosclerida | Microcionidae  | <i>Clathria</i>       | <i>Clathria (Thalysias) cf. cactiformis</i>  | (Lamarck, 1814)      | 0 | 0 | 1 | 0 | 0 | 0 |
| 797 | Demospongiae | Poecilosclerida | Microcionidae  | <i>Clathria</i>       | <i>Clathria (Thalysias) cancellaria</i>      | (Lamarck, 1814)      | 0 | 0 | 1 | 0 | 0 | 0 |
| 798 | Demospongiae | Poecilosclerida | Microcionidae  | <i>Clathria</i>       | <i>Clathria (Thalysias) cf. cancellaria</i>  | (Lamarck, 1814)      | 0 | 0 | 1 | 0 | 0 | 0 |
| 799 | Demospongiae | Poecilosclerida | Microcionidae  | <i>Clathria</i>       | <i>Clathria (Thalysias) coppingeri</i>       | Ridley, 1884         | 1 | 1 | 0 | 0 | 0 | 0 |
| 800 | Demospongiae | Poecilosclerida | Microcionidae  | <i>Clathria</i>       | <i>Clathria (Thalysias) hesperia</i>         | Hooper, 1996         | 1 | 1 | 0 | 0 | 0 | 0 |
| 801 | Demospongiae | Poecilosclerida | Microcionidae  | <i>Clathria</i>       | <i>Clathria (Thalysias) lendenfeldi</i>      | Ridley & Dendy, 1886 | 1 | 1 | 1 | 1 | 1 | 0 |
| 802 | Demospongiae | Poecilosclerida | Microcionidae  | <i>Clathria</i>       | <i>Clathria (Thalysias) cf. lendenfeldi</i>  | Ridley & Dendy, 1886 | 0 | 1 | 0 | 0 | 0 | 0 |
| 803 | Demospongiae | Poecilosclerida | Microcionidae  | <i>Clathria</i>       | <i>Clathria (Thalysias) major</i>            | Hentschel, 1912      | 1 | 1 | 1 | 0 | 0 | 0 |
| 804 | Demospongiae | Poecilosclerida | Microcionidae  | <i>Clathria</i>       | <i>Clathria (Thalysias) reinwardti</i>       | Vosmaer, 1880        | 0 | 0 | 1 | 1 | 0 | 0 |
| 805 | Demospongiae | Poecilosclerida | Microcionidae  | <i>Clathria</i>       | <i>Clathria (Thalysias) cf. reinwardti</i>   | Vosmaer, 1880        | 0 | 0 | 0 | 1 | 0 | 0 |
| 806 | Demospongiae | Poecilosclerida | Microcionidae  | <i>Clathria</i>       | <i>Clathria (Thalysias) procera</i>          | (Ridley, 1884)       | 1 | 1 | 0 | 0 | 0 | 0 |
| 807 | Demospongiae | Poecilosclerida | Microcionidae  | <i>Clathria</i>       | <i>Clathria (Thalysias) spinifera</i>        | (Lindgren, 1897)     | 1 | 1 | 0 | 1 | 0 | 0 |
| 808 | Demospongiae | Poecilosclerida | Microcionidae  | <i>Clathria</i>       | <i>Clathria (Thalysias) cf. spinifera</i>    | (Lindgren, 1897)     | 0 | 0 | 1 | 0 | 0 | 0 |
| 809 | Demospongiae | Poecilosclerida | Microcionidae  | <i>Clathria</i>       | <i>Clathria (Thalysias) vulpina</i>          | (Lamarck, 1814)      | 1 | 1 | 1 | 0 | 0 | 0 |
| 810 | Demospongiae | Poecilosclerida | Microcionidae  | <i>Clathria</i>       | <i>Clathria (Thalysias) cf. vulpina</i>      | (Lamarck, 1814)      | 0 | 0 | 0 | 1 | 0 | 0 |
| 811 | Demospongiae | Poecilosclerida | Microcionidae  | <i>Clathria</i>       | <i>Clathria (Thalysias) sp. 3</i>            |                      | 0 | 0 | 0 | 1 | 0 | 0 |
| 812 | Demospongiae | Poecilosclerida | Microcionidae  | <i>Clathria</i>       | <i>Clathria (Thalysias) sp. Ng1</i>          |                      | 0 | 0 | 0 | 1 | 0 | 0 |

|     |              |                 |               |                       |                                                                         |                        |   |   |   |   |   |   |
|-----|--------------|-----------------|---------------|-----------------------|-------------------------------------------------------------------------|------------------------|---|---|---|---|---|---|
| 813 | Demospongiae | Poecilosclerida | Microcionidae | <i>Clathria</i>       | <i>Clathria (Thalysias)</i> sp. Ng2                                     |                        | 0 | 0 | 0 | 1 | 0 | 0 |
| 814 | Demospongiae | Poecilosclerida | Microcionidae | <i>Clathria</i>       | <i>Clathria (Wilsonella)</i> cf. <i>claviformis</i>                     | Hentschel, 1912        | 0 | 0 | 1 | 0 | 0 | 0 |
| 815 | Demospongiae | Poecilosclerida | Microcionidae | <i>Clathria</i>       | <i>Clathria</i> sp. 1                                                   |                        | 0 | 0 | 0 | 1 | 0 | 0 |
| 816 | Demospongiae | Poecilosclerida | Microcionidae | <i>Clathria</i>       | <i>Clathria</i> sp. 2                                                   |                        | 0 | 0 | 0 | 1 | 0 | 0 |
| 817 | Demospongiae | Poecilosclerida | Microcionidae | <i>Clathria</i>       | <i>Clathria</i> sp.                                                     |                        | 0 | 1 | 0 | 0 | 0 | 0 |
| 818 | Demospongiae | Poecilosclerida | Microcionidae | <i>Echinochalina</i>  | <i>Echinochalina (Echinochalina) intermedia</i>                         | (Whitelegge, 1902)     | 0 | 1 | 0 | 0 | 0 | 0 |
| 819 | Demospongiae | Poecilosclerida | Microcionidae | <i>Echinochalina</i>  | <i>Echinochalina (Echinochalina)</i> cf. <i>intermedia</i>              | (Whitelegge, 1902)     | 0 | 0 | 1 | 0 | 0 | 0 |
| 820 | Demospongiae | Poecilosclerida | Microcionidae | <i>Echinochalina</i>  | <i>Echinochalina</i> sp.                                                |                        | 0 | 0 | 0 | 1 | 0 | 0 |
| 821 | Demospongiae | Poecilosclerida | Microcionidae | <i>Echinoclathria</i> | <i>Echinoclathria leporina</i>                                          |                        | 0 | 0 | 0 | 1 | 0 | 0 |
| 822 | Demospongiae | Poecilosclerida | Microcionidae | <i>Echinoclathria</i> | <i>Echinoclathria</i> sp.                                               |                        | 0 | 0 | 0 | 1 | 0 | 0 |
| 823 | Demospongiae | Poecilosclerida | Microcionidae | <i>Holopsamma</i>     | <i>Holopsamma</i> sp. Ng1                                               |                        | 0 | 0 | 0 | 0 | 0 | 1 |
| 824 | Demospongiae | Poecilosclerida | Mycalidae     | <i>Mycale</i>         | <i>Mycale (Aegogropila) pectinicola</i>                                 | Hentschel, 1911        | 0 | 1 | 0 | 0 | 0 | 0 |
| 825 | Demospongiae | Poecilosclerida | Mycalidae     | <i>Mycale</i>         | <i>Mycale (Aegogropila)?</i> sp. 3                                      |                        | 0 | 0 | 1 | 0 | 0 | 0 |
| 826 | Demospongiae | Poecilosclerida | Mycalidae     | <i>Mycale</i>         | <i>Mycale (Aegogropila)</i> 358                                         |                        | 1 | 1 | 0 | 0 | 0 | 0 |
| 827 | Demospongiae | Poecilosclerida | Mycalidae     | <i>Mycale</i>         | <i>Mycale (Aegogropila)</i> 392                                         |                        | 1 | 0 | 0 | 0 | 0 | 0 |
| 828 | Demospongiae | Poecilosclerida | Mycalidae     | <i>Mycale</i>         | <i>Mycale (Aegogropila)</i> 1799                                        |                        | 1 | 0 | 0 | 0 | 0 | 0 |
| 829 | Demospongiae | Poecilosclerida | Mycalidae     | <i>Mycale</i>         | <i>Mycale (Arenochalina) mirabilis</i>                                  | (Von Lendenfeld, 1887) | 1 | 0 | 0 | 0 | 0 | 0 |
| 830 | Demospongiae | Poecilosclerida | Mycalidae     | <i>Mycale</i>         | <i>Mycale (Arenochalina)</i> 324                                        |                        | 1 | 0 | 0 | 0 | 0 | 0 |
| 831 | Demospongiae | Poecilosclerida | Mycalidae     | <i>Mycale</i>         | <i>Mycale (Arenochalina)</i> 710                                        |                        | 0 | 1 | 0 | 0 | 0 | 0 |
| 832 | Demospongiae | Poecilosclerida | Mycalidae     | <i>Mycale</i>         | <i>Mycale (Carmia)</i> cf. <i>phyllophila</i>                           | Hentschel, 1911        | 0 | 0 | 1 | 0 | 0 | 0 |
| 833 | Demospongiae | Poecilosclerida | Mycalidae     | <i>Mycale</i>         | <i>Mycale (Grapelia)</i> cf. <i>parasitica</i>                          | (Carter, 1885)         | 0 | 0 | 1 | 0 | 0 | 0 |
| 834 | Demospongiae | Poecilosclerida | Mycalidae     | <i>Mycale</i>         | <i>Mycale (Mycale)</i> sp. 3                                            |                        | 0 | 0 | 1 | 0 | 0 | 0 |
| 835 | Demospongiae | Poecilosclerida | Mycalidae     | <i>Mycale</i>         | <i>Mycale (Mycale)</i> 80                                               |                        | 1 | 1 | 1 | 0 | 0 | 0 |
| 836 | Demospongiae | Poecilosclerida | Mycalidae     | <i>Mycale</i>         | <i>Mycale (Mycale)</i> 396                                              |                        | 1 | 1 | 1 | 0 | 1 | 0 |
| 837 | Demospongiae | Poecilosclerida | Mycalidae     | <i>Mycale</i>         | <i>Mycale (Mycale)</i> 699                                              |                        | 0 | 1 | 0 | 0 | 0 | 0 |
| 838 | Demospongiae | Poecilosclerida | Mycalidae     | <i>Mycale</i>         | <i>Mycale (Mycale)</i> 763                                              |                        | 0 | 1 | 1 | 0 | 0 | 0 |
| 839 | Demospongiae | Poecilosclerida | Mycalidae     | <i>Mycale</i>         | <i>Mycale (Aegogropila)</i> 250, cf. <i>Mycale (Naviculina) obscura</i> | (Carter, 1882)         | 1 | 0 | 0 | 0 | 0 | 0 |
| 840 | Demospongiae | Poecilosclerida | Mycalidae     | <i>Mycale</i>         | <i>Mycale (Mycale)</i> 203, cf. <i>Mycale (Zygomycale) parishi</i>      | (Bowerbank, 1875)      | 0 | 1 | 0 | 0 | 0 | 0 |
| 841 | Demospongiae | Poecilosclerida | Mycalidae     | <i>Mycale</i>         | <i>Mycale</i> sp. 1                                                     |                        | 0 | 1 | 1 | 0 | 0 | 0 |
| 842 | Demospongiae | Poecilosclerida | Mycalidae     | <i>Mycale</i>         | <i>Mycale</i> sp. 2                                                     |                        | 0 | 0 | 1 | 0 | 0 | 0 |
| 843 | Demospongiae | Poecilosclerida | Mycalidae     | <i>Mycale</i>         | <i>Mycale</i> sp. 3                                                     |                        | 0 | 0 | 1 | 0 | 0 | 0 |
| 844 | Demospongiae | Poecilosclerida | Mycalidae     | <i>Mycale</i>         | <i>Mycale</i> sp. 4                                                     |                        | 0 | 0 | 1 | 0 | 0 | 0 |
| 845 | Demospongiae | Poecilosclerida | Mycalidae     | <i>Mycale</i>         | <i>Mycale</i> sp. 5                                                     |                        | 0 | 0 | 1 | 0 | 0 | 0 |
| 846 | Demospongiae | Poecilosclerida | Mycalidae     | <i>Mycale</i>         | <i>Mycale?</i> sp. 6                                                    |                        | 0 | 0 | 1 | 0 | 0 | 0 |
| 847 | Demospongiae | Poecilosclerida | Mycalidae     | <i>Mycale</i>         | <i>Mycale</i> sp. TB1                                                   |                        | 0 | 0 | 0 | 1 | 0 | 0 |
| 848 | Demospongiae | Poecilosclerida | Mycalidae     | <i>Mycale</i>         | <i>Mycale</i> spp.                                                      |                        | 0 | 0 | 0 | 1 | 1 | 0 |
| 849 | Demospongiae | Poecilosclerida | Myxillidae    | <i>Myxilla</i>        | <i>Myxilla (Ectyomyxilla)?</i> sp. 1                                    |                        | 0 | 1 | 0 | 0 | 0 | 0 |
| 850 | Demospongiae | Poecilosclerida | Myxillidae    | <i>Psammochela</i>    | <i>Psammochela psammodes</i>                                            | (Hentschel, 1911)      | 1 | 1 | 1 | 0 | 0 | 0 |
| 851 | Demospongiae | Poecilosclerida | Myxillidae    | <i>Psammochela</i>    | <i>Psammochela?</i> sp.                                                 |                        | 0 | 0 | 0 | 1 | 0 | 0 |

|     |              |                 |                 |                        |                                                  |                       |   |   |   |   |   |   |
|-----|--------------|-----------------|-----------------|------------------------|--------------------------------------------------|-----------------------|---|---|---|---|---|---|
| 852 | Demospongiae | Poecilosclerida | Podospongiidae  | <i>Sigmosceptrella</i> | <i>Sigmosceptrella</i> cf. <i>fibrosa</i>        | (Dendy, 1897)         | 0 | 0 | 0 | 1 | 0 | 0 |
| 853 | Demospongiae | Poecilosclerida | Tedaniidae      | <i>Hemitedania</i>     | <i>Hemitedania</i> sp. 1                         |                       | 0 | 1 | 0 | 0 | 0 | 0 |
| 854 | Demospongiae | Poecilosclerida | Tedaniidae      | <i>Hemitedania</i>     | <i>Hemitedania</i> sp. SS1                       |                       | 0 | 0 | 1 | 0 | 0 | 0 |
| 855 | Demospongiae | Poecilosclerida | Tedaniidae      | <i>Strongylamma</i>    | <i>Strongylamma</i> sp. SS1                      |                       | 0 | 0 | 0 | 0 | 0 | 1 |
| 856 | Demospongiae | Poecilosclerida | Tedaniidae      | <i>Tedania</i>         | <i>Tedania</i> ( <i>Trachytedania</i> ) sp. EG1  |                       | 0 | 0 | 1 | 0 | 0 | 0 |
| 857 | Demospongiae | Poecilosclerida | Tedaniidae      | <i>Tedania</i>         | <i>Tedania</i> sp. 1                             |                       | 0 | 0 | 1 | 0 | 0 | 0 |
| 858 | Demospongiae | Poecilosclerida | Tedaniidae      | <i>Tedania</i>         | <i>Tedania</i> 246                               |                       | 0 | 1 | 0 | 0 | 0 | 0 |
| 859 | Demospongiae | Poecilosclerida | Tedaniidae      | <i>Tedania</i>         | <i>Tedania</i> sp. TB1                           |                       | 0 | 0 | 0 | 1 | 0 | 0 |
| 860 | Demospongiae | Polymastiida    | Polymastiidae   | <i>Polymastia</i>      | <i>Polymastia</i> sp. 1                          |                       | 0 | 0 | 1 | 0 | 0 | 0 |
| 861 | Demospongiae | Polymastiida    | Polymastiidae   | <i>Polymastia</i>      | <i>Polymastia</i> sp. 3                          |                       | 0 | 1 | 0 | 0 | 0 | 0 |
| 862 | Demospongiae | Polymastiida    | Polymastiidae   | <i>Polymastia</i>      | <i>Polymastia</i> sp. 4                          |                       | 0 | 0 | 1 | 0 | 0 | 0 |
| 863 | Demospongiae | Polymastiida    | Polymastiidae   | <i>Polymastia</i>      | <i>Polymastia</i> 170                            |                       | 0 | 1 | 0 | 0 | 0 | 0 |
| 864 | Demospongiae | Polymastiida    | Polymastiidae   | <i>Polymastia</i>      | <i>Polymastia</i> 483                            |                       | 0 | 1 | 0 | 0 | 0 | 0 |
| 865 | Demospongiae | Polymastiida    | Polymastiidae   | <i>Polymastia</i>      | <i>Polymastia</i> 1277                           |                       | 1 | 0 | 0 | 0 | 0 | 0 |
| 866 | Demospongiae | Polymastiida    | Polymastiidae   | <i>Polymastia</i>      | <i>Polymastia</i> 1776                           |                       | 1 | 0 | 0 | 0 | 0 | 0 |
| 867 | Demospongiae | Polymastiida    | Polymastiidae   | <i>Polymastia</i>      | <i>Polymastia</i> sp. CERF2                      |                       | 0 | 0 | 0 | 1 | 0 | 0 |
| 868 | Demospongiae | Polymastiida    | Polymastiidae   | <i>Polymastia</i>      | <i>Polymastia</i> sp. CERF3                      |                       | 0 | 0 | 0 | 1 | 0 | 0 |
| 869 | Demospongiae | Polymastiida    | Polymastiidae   | <i>Polymastia</i>      | <i>Polymastia</i> sp. QM5                        |                       | 0 | 0 | 0 | 0 | 1 | 0 |
| 870 | Demospongiae | Polymastiida    | Polymastiidae   | <i>Polymastia</i>      | <i>Polymastia</i> sp. SS1                        |                       | 0 | 1 | 0 | 1 | 0 | 0 |
| 871 | Demospongiae | Polymastiida    | Polymastiidae   | <i>Polymastia</i>      | <i>Polymastia</i> sp. SS5                        |                       | 0 | 1 | 0 | 1 | 0 | 0 |
| 872 | Demospongiae | Polymastiida    | Polymastiidae   | <i>Polymastia</i>      | <i>Polymastia</i> sp. SS6                        |                       | 0 | 0 | 0 | 1 | 0 | 0 |
| 873 | Demospongiae | Polymastiida    | Polymastiidae   | <i>Polymastia</i>      | <i>Polymastia</i> sp.                            |                       | 0 | 0 | 0 | 0 | 1 | 0 |
| 874 | Demospongiae | Scopalinida     | Scopalinidae    | <i>Scopalina</i>       | <i>Scopalina</i> cf. <i>hapalia</i>              | (Hooper et al., 1997) | 0 | 0 | 1 | 0 | 0 | 0 |
| 875 | Demospongiae | Scopalinida     | Scopalinidae    | <i>Stylissa</i>        | <i>Stylissa carteri</i>                          | (Dendy, 1889)         | 1 | 0 | 0 | 0 | 0 | 0 |
| 876 | Demospongiae | Scopalinida     | Scopalinidae    | <i>Stylissa</i>        | <i>Stylissa</i> cf. <i>carteri</i>               | (Dendy, 1889)         | 0 | 0 | 1 | 0 | 0 | 0 |
| 877 | Demospongiae | Scopalinida     | Scopalinidae    | <i>Stylissa</i>        | <i>Stylissa</i> 336, cf. <i>Stylissa carteri</i> | (Dendy, 1889)         | 1 | 1 | 0 | 0 | 0 | 0 |
| 878 | Demospongiae | Scopalinida     | Scopalinidae    | <i>Stylissa</i>        | <i>Stylissa flabelliformis</i>                   | (Hentschel, 1912)     | 0 | 0 | 1 | 0 | 0 | 0 |
| 879 | Demospongiae | Scopalinida     | Scopalinidae    | <i>Stylissa</i>        | <i>Stylissa vernonensis</i>                      | (Hooper et al., 1997) | 0 | 0 | 1 | 0 | 0 | 0 |
| 880 | Demospongiae | Suberitida      | Halichondriidae | <i>Amorhinopsis</i>    | <i>Amorhinopsis</i> cf. <i>excavans</i>          | Carter, 1887          | 0 | 0 | 1 | 0 | 0 | 0 |
| 881 | Demospongiae | Suberitida      | Halichondriidae | <i>Amorhinopsis</i>    | <i>Amorhinopsis</i> cf. <i>sacciformis</i>       | (Thiele, 1900)        | 0 | 0 | 1 | 0 | 0 | 0 |
| 882 | Demospongiae | Suberitida      | Halichondriidae | <i>Amorhinopsis</i>    | <i>Amorhinopsis</i> ? sp. 1                      |                       | 0 | 0 | 0 | 1 | 0 | 0 |
| 883 | Demospongiae | Suberitida      | Halichondriidae | <i>Amorhinopsis</i>    | <i>Amorhinopsis</i> ? sp. 2                      |                       | 0 | 0 | 0 | 1 | 0 | 0 |
| 884 | Demospongiae | Suberitida      | Halichondriidae | <i>Amorhinopsis</i>    | <i>Amorhinopsis</i> 83                           |                       | 0 | 1 | 0 | 0 | 0 | 0 |
| 885 | Demospongiae | Suberitida      | Halichondriidae | <i>Amorhinopsis</i>    | <i>Amorhinopsis</i> 1785                         |                       | 1 | 0 | 0 | 0 | 0 | 0 |
| 886 | Demospongiae | Suberitida      | Halichondriidae | <i>Ciocalypta</i>      | <i>Ciocalypta</i> cf. <i>stalagmites</i>         | Hentschel, 1912       | 0 | 0 | 0 | 1 | 0 | 0 |
| 887 | Demospongiae | Suberitida      | Halichondriidae | <i>Ciocalypta</i>      | <i>Ciocalypta tyleri</i>                         | Bowerbank, 1873       | 0 | 0 | 1 | 0 | 0 | 0 |
| 888 | Demospongiae | Suberitida      | Halichondriidae | <i>Ciocalypta</i>      | <i>Ciocalypta vansoesti</i>                      | (Hooper et al., 1997) | 0 | 0 | 1 | 0 | 0 | 0 |
| 889 | Demospongiae | Suberitida      | Halichondriidae | <i>Ciocalypta</i>      | <i>Ciocalypta</i> 641                            |                       | 1 | 0 | 0 | 0 | 0 | 0 |
| 890 | Demospongiae | Suberitida      | Halichondriidae | <i>Ciocalypta</i>      | <i>Ciocalypta</i> 1431                           |                       | 0 | 1 | 0 | 0 | 0 | 0 |
| 891 | Demospongiae | Suberitida      | Halichondriidae | <i>Ciocalypta</i>      | <i>Ciocalypta</i> sp. NTM43                      |                       | 0 | 1 | 0 | 0 | 0 | 0 |



|     |              |            |                 |                      |                                                  |                         |   |   |   |   |   |   |
|-----|--------------|------------|-----------------|----------------------|--------------------------------------------------|-------------------------|---|---|---|---|---|---|
| 892 | Demospongiae | Suberitida | Halichondriidae | <i>Ciocalypta</i>    | <i>Ciocalypta</i> sp. QM1                        |                         | 0 | 1 | 0 | 0 | 0 | 0 |
| 893 | Demospongiae | Suberitida | Halichondriidae | <i>Ciocalypta</i>    | <i>Ciocalypta</i> sp. SS5                        |                         | 0 | 1 | 0 | 0 | 0 | 0 |
| 894 | Demospongiae | Suberitida | Halichondriidae | <i>Halichondria</i>  | <i>Halichondria (Eumastia)</i> sp. SS1           |                         | 0 | 0 | 0 | 0 | 1 | 0 |
| 895 | Demospongiae | Suberitida | Halichondriidae | <i>Halichondria</i>  | <i>Halichondria (Halichondria) phakellioides</i> | Dendy & Frederick, 1924 | 0 | 1 | 1 | 1 | 0 | 0 |
| 896 | Demospongiae | Suberitida | Halichondriidae | <i>Halichondria</i>  | <i>Halichondria (Halichondria) 179</i>           |                         | 1 | 0 | 0 | 0 | 0 | 0 |
| 897 | Demospongiae | Suberitida | Halichondriidae | <i>Halichondria</i>  | <i>Halichondria (Halichondria) 244</i>           |                         | 1 | 0 | 0 | 0 | 0 | 0 |
| 898 | Demospongiae | Suberitida | Halichondriidae | <i>Halichondria</i>  | <i>Halichondria (Halichondria) 276</i>           |                         | 1 | 0 | 0 | 0 | 0 | 0 |
| 899 | Demospongiae | Suberitida | Halichondriidae | <i>Halichondria</i>  | <i>Halichondria (Halichondria) 286</i>           |                         | 1 | 0 | 0 | 0 | 0 | 0 |
| 900 | Demospongiae | Suberitida | Halichondriidae | <i>Halichondria</i>  | <i>Halichondria (Halichondria) 558</i>           |                         | 1 | 0 | 0 | 0 | 0 | 0 |
| 901 | Demospongiae | Suberitida | Halichondriidae | <i>Halichondria</i>  | <i>Halichondria (Halichondria) 566</i>           |                         | 0 | 1 | 0 | 0 | 0 | 0 |
| 902 | Demospongiae | Suberitida | Halichondriidae | <i>Halichondria</i>  | <i>Halichondria (Halichondria) 780</i>           |                         | 0 | 1 | 0 | 0 | 0 | 0 |
| 903 | Demospongiae | Suberitida | Halichondriidae | <i>Halichondria</i>  | <i>Halichondria (Halichondria) 1044</i>          |                         | 1 | 0 | 0 | 0 | 0 | 0 |
| 904 | Demospongiae | Suberitida | Halichondriidae | <i>Halichondria</i>  | <i>Halichondria (Halichondria) 1430</i>          |                         | 0 | 1 | 0 | 0 | 0 | 0 |
| 905 | Demospongiae | Suberitida | Halichondriidae | <i>Halichondria</i>  | <i>Halichondria (Halichondria) 1806</i>          |                         | 1 | 0 | 0 | 0 | 0 | 0 |
| 906 | Demospongiae | Suberitida | Halichondriidae | <i>Halichondria</i>  | <i>Halichondria (Halichondria) sp. CERF1</i>     |                         | 0 | 0 | 0 | 1 | 0 | 0 |
| 907 | Demospongiae | Suberitida | Halichondriidae | <i>Halichondria</i>  | <i>Halichondria (Halichondria) sp. CERF2</i>     |                         | 0 | 0 | 0 | 1 | 0 | 0 |
| 908 | Demospongiae | Suberitida | Halichondriidae | <i>Halichondria</i>  | <i>Halichondria (Halichondria) sp. CERF3</i>     |                         | 0 | 0 | 0 | 1 | 0 | 0 |
| 909 | Demospongiae | Suberitida | Halichondriidae | <i>Halichondria</i>  | <i>Halichondria (Halichondria) sp. QM5</i>       |                         | 0 | 1 | 0 | 0 | 0 | 0 |
| 910 | Demospongiae | Suberitida | Halichondriidae | <i>Halichondria</i>  | <i>Halichondria (Halichondria) sp. QM6</i>       |                         | 0 | 1 | 0 | 0 | 0 | 0 |
| 911 | Demospongiae | Suberitida | Halichondriidae | <i>Halichondria</i>  | <i>Halichondria (Halichondria) sp. QM7</i>       |                         | 0 | 1 | 0 | 0 | 0 | 0 |
| 912 | Demospongiae | Suberitida | Halichondriidae | <i>Halichondria</i>  | <i>Halichondria (Halichondria) sp. SS1</i>       |                         | 0 | 0 | 1 | 1 | 0 | 0 |
| 913 | Demospongiae | Suberitida | Halichondriidae | <i>Halichondria</i>  | <i>Halichondria (Halichondria) sp. SS2</i>       |                         | 0 | 1 | 0 | 0 | 0 | 0 |
| 914 | Demospongiae | Suberitida | Halichondriidae | <i>Halichondria</i>  | <i>Halichondria (Halichondria) sp. SS6</i>       |                         | 0 | 1 | 0 | 0 | 0 | 0 |
| 915 | Demospongiae | Suberitida | Halichondriidae | <i>Halichondria</i>  | <i>Halichondria sp. 2</i>                        |                         | 0 | 0 | 1 | 0 | 0 | 0 |
| 916 | Demospongiae | Suberitida | Halichondriidae | <i>Hymeniacion</i>   | <i>Hymeniacion cf. gracilis</i>                  | (Hentschel, 1912)       | 0 | 0 | 1 | 0 | 0 | 0 |
| 917 | Demospongiae | Suberitida | Halichondriidae | <i>Hymeniacion</i>   | <i>Hymeniacion sp. 2</i>                         |                         | 0 | 0 | 1 | 0 | 0 | 0 |
| 918 | Demospongiae | Suberitida | Halichondriidae | <i>Hymeniacion</i>   | <i>Hymeniacion 395</i>                           |                         | 0 | 1 | 0 | 0 | 0 | 0 |
| 919 | Demospongiae | Suberitida | Halichondriidae | <i>Hymeniacion</i>   | <i>Hymeniacion 557</i>                           |                         | 1 | 0 | 0 | 0 | 0 | 0 |
| 920 | Demospongiae | Suberitida | Halichondriidae | <i>Hymeniacion</i>   | <i>Hymeniacion sp. EG1</i>                       |                         | 0 | 0 | 1 | 0 | 0 | 0 |
| 921 | Demospongiae | Suberitida | Halichondriidae | <i>Hymeniacion</i>   | <i>Hymeniacion sp. Pilb1</i>                     |                         | 0 | 0 | 1 | 0 | 0 | 0 |
| 922 | Demospongiae | Suberitida | Halichondriidae | <i>Hymeniacion</i>   | <i>Hymeniacion sp. SS1</i>                       |                         | 0 | 0 | 0 | 1 | 0 | 0 |
| 923 | Demospongiae | Suberitida | Halichondriidae | <i>Hymeniacion</i>   | <i>Hymeniacion sp. TB1</i>                       |                         | 0 | 0 | 0 | 1 | 0 | 0 |
| 924 | Demospongiae | Suberitida | Halichondriidae | <i>Hymeniacion</i>   | <i>Hymeniacion sp.</i>                           |                         | 0 | 0 | 0 | 1 | 0 | 0 |
| 925 | Demospongiae | Suberitida | Halichondriidae | <i>Spongosorites</i> | <i>Spongosorites 349</i>                         |                         | 1 | 0 | 0 | 0 | 0 | 0 |
| 926 | Demospongiae | Suberitida | Halichondriidae | <i>Topsentia</i>     | <i>Topsentia halichondrioides</i>                | (Dendy, 1905)           | 0 | 0 | 1 | 0 | 0 | 0 |
| 927 | Demospongiae | Suberitida | Halichondriidae | <i>Topsentia</i>     | <i>Topsentia sp. 1</i>                           |                         | 0 | 0 | 1 | 0 | 0 | 0 |
| 928 | Demospongiae | Suberitida | Halichondriidae | <i>Topsentia</i>     | <i>Topsentia sp. 2</i>                           |                         | 0 | 1 | 0 | 0 | 1 | 0 |
| 929 | Demospongiae | Suberitida | Halichondriidae | <i>Topsentia</i>     | <i>Topsentia sp. 3</i>                           |                         | 0 | 0 | 0 | 0 | 1 | 0 |
| 930 | Demospongiae | Suberitida | Halichondriidae | <i>Topsentia</i>     | <i>Topsentia 1438</i>                            |                         | 0 | 0 | 1 | 0 | 0 | 0 |
| 931 | Demospongiae | Suberitida | Suberitidae     | <i>Aaptos</i>        | <i>Aaptos aaptos</i>                             | (Schmidt, 1864)         | 0 | 1 | 0 | 0 | 0 | 0 |

|     |              |            |                  |                        |                                                       |                                |   |   |   |   |   |   |
|-----|--------------|------------|------------------|------------------------|-------------------------------------------------------|--------------------------------|---|---|---|---|---|---|
| 932 | Demospongiae | Suberitida | Suberitidae      | <i>Aaptos</i>          | <i>Aaptos</i> sp. 1                                   |                                | 0 | 0 | 1 | 0 | 0 | 0 |
| 933 | Demospongiae | Suberitida | Suberitidae      | <i>Caulospongia</i>    | <i>Caulospongia amplexa</i>                           | Fromont, 1998                  | 1 | 0 | 0 | 1 | 0 | 0 |
| 934 | Demospongiae | Suberitida | Suberitidae      | <i>Caulospongia</i>    | <i>Caulospongia biflabellata</i>                      | Fromont, 1998                  | 0 | 1 | 1 | 0 | 0 | 0 |
| 935 | Demospongiae | Suberitida | Suberitidae      | <i>Caulospongia</i>    | <i>Caulospongia pennatula</i>                         | (Lamarck, 1814)                | 0 | 0 | 1 | 1 | 0 | 1 |
| 936 | Demospongiae | Suberitida | Suberitidae      | <i>Caulospongia</i>    | <i>Caulospongia perfoliata</i>                        | (Lamarck, 1814)                | 1 | 1 | 0 | 0 | 0 | 0 |
| 937 | Demospongiae | Suberitida | Suberitidae      | <i>Caulospongia</i>    | <i>Caulospongia plicata</i>                           | Kent, 1871                     | 1 | 1 | 1 | 1 | 0 | 0 |
| 938 | Demospongiae | Suberitida | Suberitidae      | <i>Caulospongia</i>    | <i>Caulospongia</i> sp. 1                             |                                | 0 | 1 | 0 | 0 | 0 | 0 |
| 939 | Demospongiae | Suberitida | Suberitidae      | <i>Caulospongia</i>    | <i>Caulospongia</i> sp.                               |                                | 0 | 0 | 0 | 0 | 1 | 0 |
| 940 | Demospongiae | Suberitida | Suberitidae      | <i>Homaxinella</i>     | <i>Homaxinella</i> 314                                |                                | 1 | 0 | 0 | 0 | 0 | 0 |
| 941 | Demospongiae | Suberitida | Suberitidae      | <i>Homaxinella</i>     | <i>Homaxinella</i> 640                                |                                | 1 | 0 | 0 | 0 | 0 | 0 |
| 942 | Demospongiae | Suberitida | Suberitidae      | <i>Plicatellopsis</i>  | <i>Plicatellopsis</i> 340                             |                                | 1 | 0 | 0 | 0 | 0 | 0 |
| 943 | Demospongiae | Suberitida | Suberitidae      | <i>Protosuberites</i>  | <i>Protosuberites proteus</i>                         | (Hentschel, 1909)              | 0 | 0 | 1 | 0 | 0 | 0 |
| 944 | Demospongiae | Suberitida | Suberitidae      | <i>Protosuberites</i>  | <i>Protosuberites epiphytum</i>                       | (Lamarck, 1815)                | 0 | 0 | 0 | 1 | 0 | 0 |
| 945 | Demospongiae | Suberitida | Suberitidae      | <i>Pseudosuberites</i> | <i>Pseudosuberites andrewsi</i>                       | Kirkpatrick, 1900              | 0 | 1 | 0 | 0 | 0 | 0 |
| 946 | Demospongiae | Suberitida | Suberitidae      | <i>Suberites</i>       | <i>Suberites</i> 1615                                 |                                | 1 | 0 | 0 | 0 | 0 | 0 |
| 947 | Demospongiae | Suberitida | Suberitidae      | <i>Terpios</i>         | <i>Terpios</i> cf. <i>australiensis</i>               | Hentschel, 1909                | 0 | 0 | 1 | 0 | 0 | 0 |
| 948 | Demospongiae | Suberitida | Suberitidae      | <i>Terpios</i>         | <i>Terpios</i> 4771, cf. <i>Terpios australiensis</i> | Hentschel, 1909                | 0 | 0 | 1 | 0 | 0 | 0 |
| 949 | Demospongiae | Tethyida   | Hemiasterellidae | <i>Axos</i>            | <i>Axos cliffoni</i>                                  | Gray, 1867                     | 1 | 1 | 1 | 1 | 0 | 0 |
| 950 | Demospongiae | Tethyida   | Hemiasterellidae | <i>Axos</i>            | <i>Axos flabelliformis</i>                            | Carter, 1879                   | 1 | 1 | 1 | 0 | 0 | 0 |
| 951 | Demospongiae | Tethyida   | Hemiasterellidae | <i>Axos</i>            | <i>Axos</i> sp.                                       |                                | 0 | 0 | 1 | 0 | 0 | 0 |
| 952 | Demospongiae | Tethyida   | Hemiasterellidae | <i>Hemiasterella</i>   | <i>Hemiasterella</i> sp. 1                            |                                | 0 | 0 | 0 | 0 | 1 | 0 |
| 953 | Demospongiae | Tethyida   | Hemiasterellidae | <i>Hemiasterella</i>   | <i>Hemiasterella</i> sp. 2                            |                                | 0 | 0 | 1 | 0 | 0 | 0 |
| 954 | Demospongiae | Tethyida   | Hemiasterellidae | <i>Hemiasterella</i>   | <i>Hemiasterella</i> 694                              |                                | 0 | 1 | 0 | 0 | 0 | 0 |
| 955 | Demospongiae | Tethyida   | Hemiasterellidae | <i>Hemiasterella</i>   | <i>Hemiasterella</i> 1787                             |                                | 1 | 0 | 0 | 0 | 0 | 0 |
| 956 | Demospongiae | Tethyida   | Hemiasterellidae | <i>Hemiasterella</i>   | <i>Hemiasterella</i> sp. CERF1                        |                                | 0 | 0 | 0 | 1 | 0 | 0 |
| 957 | Demospongiae | Tethyida   | Hemiasterellidae | <i>Hemiasterella</i>   | <i>Hemiasterella</i> sp. EG1                          |                                | 0 | 0 | 1 | 0 | 0 | 0 |
| 958 | Demospongiae | Tethyida   | Hemiasterellidae | <i>Hemiasterella</i>   | <i>Hemiasterella?</i> sp. EG1                         |                                | 0 | 0 | 1 | 0 | 0 | 0 |
| 959 | Demospongiae | Tethyida   | Hemiasterellidae | <i>Hemiasterella</i>   | <i>Hemiasterella</i> sp. SS1                          |                                | 0 | 0 | 0 | 1 | 0 | 0 |
| 960 | Demospongiae | Tethyida   | Hemiasterellidae | <i>Hemiasterella</i>   | <i>Hemiasterella</i> sp. SS2                          |                                | 0 | 0 | 0 | 1 | 0 | 0 |
| 961 | Demospongiae | Tethyida   | Hemiasterellidae | <i>Hemiasterella</i>   | <i>Hemiasterella</i> spp.                             |                                | 0 | 0 | 0 | 1 | 0 | 0 |
| 962 | Demospongiae | Tethyida   | Hemiasterellidae | <i>Liosina</i>         | <i>Liosina</i> cf. <i>granularis</i>                  | Kelly-Borges & Bergquist, 1988 | 0 | 0 | 1 | 0 | 0 | 0 |
| 963 | Demospongiae | Tethyida   | Hemiasterellidae | <i>Liosina</i>         | <i>Liosina</i> cf. <i>paradoxa</i>                    | Thiele, 1899                   | 0 | 0 | 1 | 0 | 0 | 0 |
| 964 | Demospongiae | Tethyida   | Hemiasterellidae | <i>Liosina</i>         | <i>Liosina</i> sp. Pilb1                              |                                | 0 | 0 | 1 | 0 | 0 | 0 |
| 965 | Demospongiae | Tethyida   | Tethyidae        | <i>Anthotethya</i>     | <i>Anthotethya fromontae</i>                          | Sarà & Sarà, 2002              | 0 | 0 | 1 | 0 | 0 | 0 |
| 966 | Demospongiae | Tethyida   | Tethyidae        | <i>Laxotethya</i>      | <i>Laxotethya dampierensis</i>                        | Sarà & Sarà, 2002              | 0 | 0 | 1 | 0 | 0 | 0 |
| 967 | Demospongiae | Tethyida   | Tethyidae        | <i>Laxotethya</i>      | <i>Laxotethya</i> cf. <i>dampierensis</i>             | Sarà & Sarà, 2002              | 0 | 0 | 0 | 1 | 0 | 0 |
| 968 | Demospongiae | Tethyida   | Tethyidae        | <i>Stellitethya</i>    | <i>Stellitethya ingens</i>                            | Sarà & Sarà, 2003              | 0 | 1 | 0 | 0 | 0 | 0 |
| 969 | Demospongiae | Tethyida   | Tethyidae        | <i>Tethya</i>          | <i>Tethya bergquistae</i>                             | Hooper, 1994                   | 1 | 0 | 0 | 0 | 0 | 0 |

|      |              |                 |             |                    |                                             |                                |   |   |   |   |   |   |
|------|--------------|-----------------|-------------|--------------------|---------------------------------------------|--------------------------------|---|---|---|---|---|---|
| 970  | Demospongiae | Tethyida        | Tethyidae   | <i>Tethya</i>      | <i>Tethya coccinea</i>                      | Bergquist & Kelly-Borges, 1991 | 0 | 1 | 0 | 0 | 0 | 0 |
| 971  | Demospongiae | Tethyida        | Tethyidae   | <i>Tethya</i>      | <i>Tethya flexuosa</i>                      | Sarà & Sarà, 2004              | 1 | 0 | 0 | 0 | 0 | 0 |
| 972  | Demospongiae | Tethyida        | Tethyidae   | <i>Tethya</i>      | <i>Tethya</i> cf. <i>ingalli</i>            | Bowerbank, 1858                | 0 | 1 | 0 | 0 | 0 | 0 |
| 973  | Demospongiae | Tethyida        | Tethyidae   | <i>Tethya</i>      | <i>Tethya magna</i>                         | Kirkpatrick, 1903              | 1 | 0 | 0 | 0 | 0 | 0 |
| 974  | Demospongiae | Tethyida        | Tethyidae   | <i>Tethya</i>      | <i>Tethya seychellensis</i>                 | (Wright, 1881)                 | 0 | 0 | 1 | 0 | 0 | 0 |
| 975  | Demospongiae | Tethyida        | Tethyidae   | <i>Tethya</i>      | <i>Tethya</i> sp. 1                         |                                | 0 | 0 | 1 | 0 | 0 | 0 |
| 976  | Demospongiae | Tethyida        | Tethyidae   | <i>Tethya</i>      | <i>Tethya</i> sp. 2                         |                                | 0 | 0 | 1 | 0 | 0 | 0 |
| 977  | Demospongiae | Tethyida        | Tethyidae   | <i>Tethya</i>      | <i>Tethya</i> 310                           |                                | 1 | 1 | 0 | 0 | 0 | 0 |
| 978  | Demospongiae | Tethyida        | Tethyidae   | <i>Tethya</i>      | <i>Tethya</i> 322                           |                                | 1 | 1 | 0 | 0 | 0 | 0 |
| 979  | Demospongiae | Tethyida        | Tethyidae   | <i>Tethya</i>      | <i>Tethya</i> sp. QM2                       |                                | 0 | 0 | 0 | 0 | 1 | 0 |
| 980  | Demospongiae | Tethyida        | Tethyidae   | <i>Tethya</i>      | <i>Tethya</i> sp.                           |                                | 0 | 0 | 0 | 1 | 0 | 0 |
| 981  | Demospongiae | Tethyida        | Tethyidae   | <i>Tethytimea</i>  | <i>Tethytimea</i> sp. SS1                   |                                | 0 | 0 | 0 | 1 | 0 | 0 |
| 982  | Demospongiae | Tethyida        | Tethyidae   | <i>Xenospongia</i> | <i>Xenospongia patelliformis</i>            | Gray, 1858                     | 1 | 1 | 1 | 0 | 0 | 0 |
| 983  | Demospongiae | Tethyida        | Tethyidae   | <i>Xenospongia</i> | <i>Xenospongia</i> cf. <i>patelliformis</i> | Gray, 1858                     | 0 | 0 | 0 | 1 | 0 | 0 |
| 984  | Demospongiae | Tethyida        | Tethyidae   | <i>Xenospongia</i> | <i>Xenospongia</i> sp.                      |                                | 1 | 0 | 0 | 0 | 0 | 0 |
| 985  | Demospongiae | Tethyida        | Timeidae    | <i>Timea</i>       | <i>Timea</i> cf. <i>centrifera</i>          | (Hentschel, 1909)              | 0 | 0 | 1 | 0 | 0 | 0 |
| 986  | Demospongiae | Tethyida        | Timeidae    | <i>Timea</i>       | <i>Timea</i> cf. <i>lowchoyi</i>            | Hooper, 1986                   | 0 | 0 | 0 | 1 | 0 | 0 |
| 987  | Demospongiae | Tetractinellida | Ancorinidae | <i>Ancorina</i>    | <i>Ancorina</i> 499                         |                                | 0 | 0 | 1 | 0 | 0 | 0 |
| 988  | Demospongiae | Tetractinellida | Ancorinidae | <i>Ancorina</i>    | <i>Ancorina</i> sp.                         |                                | 0 | 1 | 0 | 0 | 0 | 0 |
| 989  | Demospongiae | Tetractinellida | Ancorinidae | <i>Asteropus</i>   | <i>Asteropus</i> sp. 1                      |                                | 0 | 1 | 0 | 0 | 0 | 0 |
| 990  | Demospongiae | Tetractinellida | Ancorinidae | <i>Asteropus</i>   | <i>Asteropus</i> sp. SS1                    |                                | 0 | 0 | 0 | 1 | 0 | 0 |
| 991  | Demospongiae | Tetractinellida | Ancorinidae | <i>Asteropus</i>   | <i>Asteropus</i> sp. SS2                    |                                | 0 | 0 | 0 | 1 | 0 | 0 |
| 992  | Demospongiae | Tetractinellida | Ancorinidae | <i>Asteropus</i>   | <i>Asteropus</i> sp. SS6                    |                                | 1 | 0 | 0 | 0 | 0 | 0 |
| 993  | Demospongiae | Tetractinellida | Ancorinidae | <i>Disyringa</i>   | <i>Disyringa dissimilis</i>                 | (Ridley, 1884)                 | 1 | 0 | 0 | 0 | 0 | 0 |
| 994  | Demospongiae | Tetractinellida | Ancorinidae | <i>Disyringa</i>   | <i>Disyringa</i> cf. <i>nodosa</i>          | Von Lendenfeld, 1907           | 0 | 0 | 1 | 0 | 0 | 0 |
| 995  | Demospongiae | Tetractinellida | Ancorinidae | <i>Ecionemia</i>   | <i>Ecionemia</i> cf. <i>obtusum</i>         | (Von Lendenfeld, 1907)         | 0 | 1 | 0 | 0 | 0 | 0 |
| 996  | Demospongiae | Tetractinellida | Ancorinidae | <i>Ecionemia</i>   | <i>Ecionemia</i> sp. Ng1                    |                                | 0 | 0 | 0 | 1 | 0 | 0 |
| 997  | Demospongiae | Tetractinellida | Ancorinidae | <i>Ecionemia</i>   | <i>Ecionemia</i> sp. SS1                    |                                | 0 | 0 | 0 | 1 | 0 | 0 |
| 998  | Demospongiae | Tetractinellida | Ancorinidae | <i>Ecionemia</i>   | <i>Ecionemia</i> sp. SS2                    |                                | 0 | 0 | 0 | 1 | 0 | 0 |
| 999  | Demospongiae | Tetractinellida | Ancorinidae | <i>Ecionemia</i>   | <i>Ecionemia</i> sp. SS3                    |                                | 0 | 0 | 0 | 1 | 0 | 1 |
| 1000 | Demospongiae | Tetractinellida | Ancorinidae | <i>Jaspis</i>      | <i>Jaspis</i> sp. 1                         |                                | 0 | 1 | 0 | 0 | 0 | 0 |
| 1001 | Demospongiae | Tetractinellida | Ancorinidae | <i>Jaspis</i>      | <i>Jaspis</i> sp. 2                         |                                | 0 | 0 | 1 | 0 | 0 | 0 |
| 1002 | Demospongiae | Tetractinellida | Ancorinidae | <i>Jaspis</i>      | <i>Jaspis</i> 528                           |                                | 1 | 1 | 0 | 0 | 0 | 0 |
| 1003 | Demospongiae | Tetractinellida | Ancorinidae | <i>Jaspis</i>      | <i>Jaspis</i> 1794                          |                                | 1 | 1 | 0 | 0 | 0 | 0 |
| 1004 | Demospongiae | Tetractinellida | Ancorinidae | <i>Jaspis</i>      | <i>Jaspis</i> sp. Ng1                       |                                | 0 | 0 | 0 | 1 | 0 | 0 |
| 1005 | Demospongiae | Tetractinellida | Ancorinidae | <i>Jaspis</i>      | <i>Jaspis</i> sp. Ng2                       |                                | 0 | 1 | 0 | 1 | 0 | 0 |
| 1006 | Demospongiae | Tetractinellida | Ancorinidae | <i>Jaspis</i>      | <i>Jaspis</i> sp. SS2                       |                                | 0 | 0 | 0 | 1 | 0 | 0 |
| 1007 | Demospongiae | Tetractinellida | Ancorinidae | <i>Jaspis</i>      | <i>Jaspis</i> sp. SS4                       |                                | 0 | 0 | 0 | 1 | 0 | 0 |
| 1008 | Demospongiae | Tetractinellida | Ancorinidae | <i>Jaspis</i>      | <i>Jaspis</i> sp. SS6                       |                                | 0 | 1 | 0 | 0 | 0 | 0 |

|      |              |                 |                 |                                  |                                                     |                        |   |   |   |   |   |   |
|------|--------------|-----------------|-----------------|----------------------------------|-----------------------------------------------------|------------------------|---|---|---|---|---|---|
| 1009 | Demospongiae | Tetractinellida | Ancorinidae     | <i>Jaspis</i>                    | <i>Jaspis</i> sp. SS7                               |                        | 0 | 1 | 0 | 0 | 0 | 0 |
| 1010 | Demospongiae | Tetractinellida | Ancorinidae     | <i>Jaspis</i>                    | <i>Jaspis</i> ? sp. 2                               |                        | 0 | 1 | 0 | 0 | 0 | 0 |
| 1011 | Demospongiae | Tetractinellida | Ancorinidae     | <i>Penares</i>                   | <i>Penares</i> sp. 1                                |                        | 0 | 0 | 1 | 0 | 0 | 0 |
| 1012 | Demospongiae | Tetractinellida | Ancorinidae     | <i>Rhabdastrella</i>             | <i>Rhabdastrella globostellata</i>                  | (Carter, 1883)         | 0 | 1 | 1 | 1 | 0 | 0 |
| 1013 | Demospongiae | Tetractinellida | Ancorinidae     | <i>Rhabdastrella</i>             | <i>Rhabdastrella</i> sp. 1                          |                        | 0 | 0 | 0 | 0 | 1 | 0 |
| 1014 | Demospongiae | Tetractinellida | Ancorinidae     | <i>Rhabdastrella</i>             | <i>Rhabdastrella</i> sp. 2                          |                        | 0 | 1 | 0 | 0 | 0 | 0 |
| 1015 | Demospongiae | Tetractinellida | Ancorinidae     | <i>Rhabdastrella</i>             | <i>Rhabdastrella</i> sp. SS2                        |                        | 0 | 0 | 0 | 1 | 0 | 0 |
| 1016 | Demospongiae | Tetractinellida | Ancorinidae     | <i>Stelletta</i>                 | <i>Stelletta clavosa</i>                            | Ridley, 1884           | 1 | 0 | 0 | 0 | 0 | 0 |
| 1017 | Demospongiae | Tetractinellida | Ancorinidae     | <i>Stelletta</i>                 | <i>Stelletta</i> cf. <i>clavosa</i>                 | Ridley, 1884           | 0 | 1 | 1 | 1 | 0 | 0 |
| 1018 | Demospongiae | Tetractinellida | Ancorinidae     | <i>Stelletta</i>                 | <i>Stelletta</i> 511, cf. <i>Stelletta purpurea</i> | Ridley, 1884           | 1 | 1 | 0 | 0 | 0 | 0 |
| 1019 | Demospongiae | Tetractinellida | Ancorinidae     | <i>Stelletta</i>                 | <i>Stelletta</i> sp. 1                              |                        | 0 | 0 | 0 | 0 | 1 | 0 |
| 1020 | Demospongiae | Tetractinellida | Ancorinidae     | <i>Stelletta</i>                 | <i>Stelletta</i> sp. 2                              |                        | 0 | 0 | 0 | 0 | 1 | 0 |
| 1021 | Demospongiae | Tetractinellida | Ancorinidae     | <i>Stelletta</i>                 | <i>Stelletta</i> 168                                |                        | 0 | 1 | 0 | 0 | 0 | 0 |
| 1022 | Demospongiae | Tetractinellida | Ancorinidae     | <i>Stelletta</i>                 | <i>Stelletta</i> 345                                |                        | 1 | 1 | 0 | 0 | 0 | 0 |
| 1023 | Demospongiae | Tetractinellida | Ancorinidae     | <i>Stelletta</i>                 | <i>Stelletta</i> 1005                               |                        | 0 | 1 | 0 | 0 | 0 | 0 |
| 1024 | Demospongiae | Tetractinellida | Ancorinidae     | <i>Stelletta</i>                 | <i>Stelletta</i> 2397                               |                        | 1 | 0 | 0 | 0 | 0 | 0 |
| 1025 | Demospongiae | Tetractinellida | Ancorinidae     | <i>Stelletta</i>                 | <i>Stelletta</i> sp. nov. QM2                       |                        | 0 | 1 | 0 | 0 | 0 | 0 |
| 1026 | Demospongiae | Tetractinellida | Ancorinidae     | <i>Stelletta</i>                 | <i>Stelletta</i> sp. SS1                            |                        | 0 | 0 | 0 | 1 | 0 | 0 |
| 1027 | Demospongiae | Tetractinellida | Ancorinidae     | <i>Stelletta</i>                 | <i>Stelletta</i> sp. SS2                            |                        | 0 | 0 | 0 | 1 | 0 | 0 |
| 1028 | Demospongiae | Tetractinellida | Ancorinidae     | <i>Stelletta</i>                 | <i>Stelletta</i> sp. SS4                            |                        | 0 | 0 | 0 | 1 | 0 | 0 |
| 1029 | Demospongiae | Tetractinellida | Ancorinidae     | <i>Stelletta</i>                 | <i>Stelletta</i> sp. SS11                           |                        | 1 | 0 | 0 | 0 | 0 | 0 |
| 1030 | Demospongiae | Tetractinellida | Ancorinidae     | <i>Tribrachium</i>               | <i>Tribrachium</i> sp. SS1                          |                        | 0 | 1 | 0 | 0 | 0 | 0 |
| 1031 | Demospongiae | Tetractinellida | Azoricidae      | <i>Jereicopsis</i>               | <i>Jereicopsis</i> sp. nov. 1                       |                        | 0 | 0 | 0 | 1 | 0 | 0 |
| 1032 | Demospongiae | Tetractinellida | Azoricidae      | <i>Leiodermatium</i>             | <i>Leiodermatium</i> sp. 2                          |                        | 0 | 1 | 0 | 0 | 0 | 0 |
| 1033 | Demospongiae | Tetractinellida | Calthropellidae | <i>Calthropella</i>              | <i>Calthropella</i> ( <i>Calthropella</i> ) sp. 1   |                        | 0 | 0 | 1 | 0 | 0 | 0 |
| 1034 | Demospongiae | Tetractinellida | Corallistidae   | Corallistidae unknown<br>genus_1 | Corallistidae unknown sp. nov. G1                   |                        | 0 | 0 | 0 | 1 | 0 | 0 |
| 1035 | Demospongiae | Tetractinellida | Geodiidae       | <i>Erylus</i>                    | <i>Erylus</i> cf. <i>lendenfeldi</i>                |                        | 0 | 0 | 0 | 1 | 0 | 0 |
| 1036 | Demospongiae | Tetractinellida | Geodiidae       | <i>Erylus</i>                    | <i>Erylus</i> cf. <i>proximus</i>                   |                        | 0 | 1 | 0 | 0 | 0 | 0 |
| 1037 | Demospongiae | Tetractinellida | Geodiidae       | <i>Erylus</i>                    | <i>Erylus</i> sp. SS1                               |                        | 0 | 1 | 0 | 1 | 0 | 0 |
| 1038 | Demospongiae | Tetractinellida | Geodiidae       | <i>Erylus</i>                    | <i>Erylus</i> sp. SS2                               |                        | 0 | 1 | 0 | 1 | 0 | 0 |
| 1039 | Demospongiae | Tetractinellida | Geodiidae       | <i>Geodia</i>                    | <i>Geodia</i> ( <i>Isops</i> ) <i>sollasi</i>       | (Von Lendenfeld, 1888) | 0 | 0 | 1 | 0 | 0 | 0 |
| 1040 | Demospongiae | Tetractinellida | Geodiidae       | <i>Geodia</i>                    | <i>Geodia</i> ( <i>Isops</i> ) sp. Ng1              |                        | 0 | 0 | 0 | 1 | 0 | 0 |
| 1041 | Demospongiae | Tetractinellida | Geodiidae       | <i>Geodia</i>                    | <i>Geodia</i> ( <i>Isops</i> ) sp. Ng2              |                        | 0 | 0 | 0 | 1 | 0 | 0 |
| 1042 | Demospongiae | Tetractinellida | Geodiidae       | <i>Geodia</i>                    | <i>Geodia</i> ( <i>Isops</i> ) sp. SS2              |                        | 0 | 0 | 0 | 1 | 1 | 0 |
| 1043 | Demospongiae | Tetractinellida | Geodiidae       | <i>Geodia</i>                    | <i>Geodia</i> sp. 1                                 |                        | 0 | 0 | 1 | 0 | 0 | 0 |
| 1044 | Demospongiae | Tetractinellida | Geodiidae       | <i>Geodia</i>                    | <i>Geodia</i> sp. 2                                 |                        | 0 | 0 | 0 | 0 | 1 | 0 |
| 1045 | Demospongiae | Tetractinellida | Geodiidae       | <i>Geodia</i>                    | <i>Geodia</i> sp. 3                                 |                        | 0 | 0 | 0 | 0 | 1 | 0 |
| 1046 | Demospongiae | Tetractinellida | Geodiidae       | <i>Geodia</i>                    | <i>Geodia</i> sp. 4                                 |                        | 0 | 1 | 0 | 0 | 0 | 0 |
| 1047 | Demospongiae | Tetractinellida | Geodiidae       | <i>Geodia</i>                    | <i>Geodia</i> cf. sp. 4                             |                        | 0 | 0 | 0 | 0 | 1 | 0 |

|      |              |                 |                  |                         |                                              |                         |   |   |   |   |   |   |
|------|--------------|-----------------|------------------|-------------------------|----------------------------------------------|-------------------------|---|---|---|---|---|---|
| 1048 | Demospongiae | Tetractinellida | Geodiidae        | <i>Geodia</i>           | <i>Geodia</i> sp. 5                          |                         | 0 | 0 | 1 | 0 | 0 | 0 |
| 1049 | Demospongiae | Tetractinellida | Geodiidae        | <i>Geodia</i>           | <i>Geodia</i> 541                            |                         | 1 | 1 | 0 | 0 | 0 | 0 |
| 1050 | Demospongiae | Tetractinellida | Geodiidae        | <i>Geodia</i>           | <i>Geodia</i> 1779                           |                         | 0 | 1 | 0 | 0 | 0 | 0 |
| 1051 | Demospongiae | Tetractinellida | Geodiidae        | <i>Geodia</i>           | <i>Geodia</i> 1788                           |                         | 1 | 0 | 0 | 0 | 0 | 0 |
| 1052 | Demospongiae | Tetractinellida | Geodiidae        | <i>Geodia</i>           | <i>Geodia</i> sp. A                          |                         | 0 | 0 | 0 | 0 | 1 | 0 |
| 1053 | Demospongiae | Tetractinellida | Geodiidae        | <i>Geodia</i>           | <i>Geodia</i> sp. Ng1                        |                         | 0 | 0 | 0 | 1 | 0 | 0 |
| 1054 | Demospongiae | Tetractinellida | Geodiidae        | <i>Geodia</i>           | <i>Geodia</i> sp. SS1                        |                         | 1 | 0 | 0 | 0 | 0 | 0 |
| 1055 | Demospongiae | Tetractinellida | Geodiidae        | <i>Geodia</i>           | <i>Geodia</i> sp. SS2                        |                         | 0 | 0 | 0 | 1 | 0 | 0 |
| 1056 | Demospongiae | Tetractinellida | Geodiidae        | <i>Geodia</i>           | <i>Geodia</i> spp.                           |                         | 1 | 1 | 0 | 0 | 0 | 0 |
| 1057 | Demospongiae | Tetractinellida | Geodiidae        | <i>Melophlus</i>        | <i>Melophlus</i> 1091                        |                         | 1 | 0 | 0 | 0 | 0 | 0 |
| 1058 | Demospongiae | Tetractinellida | Geodiidae        | <i>Pachymatisma</i>     | <i>Pachymatisma</i> 311                      |                         | 1 | 0 | 0 | 0 | 0 | 0 |
| 1059 | Demospongiae | Tetractinellida | Macandrewiidae   | <i>Macandrewia</i>      | <i>Macandrewia?</i> spp.                     |                         | 0 | 0 | 0 | 0 | 1 | 0 |
| 1060 | Demospongiae | Tetractinellida | Neopeltidae      | <i>Callipelta</i>       | <i>Callipelta?</i> sp. 1                     |                         | 0 | 0 | 0 | 0 | 1 | 0 |
| 1061 | Demospongiae | Tetractinellida | Pleromidae       | <i>Pleroma</i>          | <i>Pleroma?</i> sp. 1                        |                         | 0 | 0 | 0 | 0 | 1 | 0 |
| 1062 | Demospongiae | Tetractinellida | Pleromidae       | <i>Pleroma</i>          | <i>Pleroma?</i> sp.                          |                         | 0 | 0 | 0 | 0 | 1 | 0 |
| 1063 | Demospongiae | Tetractinellida | Scleritodermidae | <i>Microscleroderma</i> | <i>Microscleroderma</i> sp. 1                |                         | 0 | 1 | 0 | 1 | 0 | 0 |
| 1064 | Demospongiae | Tetractinellida | Scleritodermidae | <i>Microscleroderma</i> | <i>Microscleroderma</i> cf. <i>herdmani</i>  | (Dendy, 1905)           | 0 | 1 | 0 | 1 | 0 | 0 |
| 1065 | Demospongiae | Tetractinellida | Scleritodermidae | <i>Microscleroderma</i> | <i>Microscleroderma</i> sp. nov. 1           |                         | 0 | 0 | 0 | 1 | 0 | 0 |
| 1066 | Demospongiae | Tetractinellida | Tetillidae       | <i>Cinachyrella</i>     | <i>Cinachyrella</i> sp. 1                    |                         | 0 | 1 | 1 | 1 | 0 | 0 |
| 1067 | Demospongiae | Tetractinellida | Tetillidae       | <i>Cinachyrella</i>     | <i>Cinachyrella</i> sp. QM4                  |                         | 0 | 1 | 0 | 0 | 0 | 0 |
| 1068 | Demospongiae | Tetractinellida | Tetillidae       | <i>Cinachyrella</i>     | <i>Cinachyrella</i> sp. QM5                  |                         | 0 | 0 | 1 | 0 | 0 | 0 |
| 1069 | Demospongiae | Tetractinellida | Tetillidae       | <i>Cinachyrella</i>     | <i>Cinachyrella</i> sp.                      |                         | 0 | 0 | 0 | 0 | 0 | 1 |
| 1070 | Demospongiae | Tetractinellida | Tetillidae       | <i>Cinachyrella</i>     | <i>Cinachyrella australiensis</i>            | (Carter, 1886)          | 1 | 1 | 0 | 0 | 0 | 0 |
| 1071 | Demospongiae | Tetractinellida | Tetillidae       | <i>Cinachyrella</i>     | <i>Cinachyrella</i> cf. <i>australiensis</i> | (Carter, 1886)          | 0 | 1 | 1 | 1 | 0 | 1 |
| 1072 | Demospongiae | Tetractinellida | Tetillidae       | <i>Cinachyrella</i>     | <i>Cinachyrella schulzei</i>                 | (Keller, 1891)          | 1 | 0 | 1 | 0 | 0 | 0 |
| 1073 | Demospongiae | Tetractinellida | Tetillidae       | <i>Cinachyrella</i>     | <i>Cinachyrella</i> cf. <i>tenuiviolacea</i> | (Pulitzer-Finali, 1982) | 0 | 0 | 1 | 1 | 0 | 0 |
| 1074 | Demospongiae | Tetractinellida | Tetillidae       | <i>Cinachyrella</i>     | <i>Cinachyrella uteoides</i>                 | (Dendy, 1924)           | 0 | 1 | 0 | 0 | 1 | 0 |
| 1075 | Demospongiae | Tetractinellida | Tetillidae       | <i>Cinachyrella</i>     | <i>Cinachyrella</i> sp. 1                    |                         | 0 | 0 | 1 | 0 | 0 | 0 |
| 1076 | Demospongiae | Tetractinellida | Tetillidae       | <i>Cinachyrella</i>     | <i>Cinachyrella</i> sp. 2                    |                         | 0 | 0 | 1 | 0 | 0 | 0 |
| 1077 | Demospongiae | Tetractinellida | Tetillidae       | <i>Cinachyrella</i>     | <i>Cinachyrella</i> sp. 4                    |                         | 0 | 0 | 1 | 0 | 0 | 0 |
| 1078 | Demospongiae | Tetractinellida | Tetillidae       | <i>Cinachyrella</i>     | <i>Cinachyrella</i> 205                      |                         | 1 | 0 | 0 | 0 | 0 | 0 |
| 1079 | Demospongiae | Tetractinellida | Tetillidae       | <i>Cinachyrella</i>     | <i>Cinachyrella</i> 299                      |                         | 0 | 1 | 0 | 0 | 0 | 0 |
| 1080 | Demospongiae | Tetractinellida | Tetillidae       | <i>Cinachyrella</i>     | <i>Cinachyrella</i> 309                      |                         | 0 | 1 | 0 | 0 | 0 | 0 |
| 1081 | Demospongiae | Tetractinellida | Tetillidae       | <i>Cinachyrella</i>     | <i>Cinachyrella</i> 333                      |                         | 1 | 0 | 0 | 0 | 0 | 0 |
| 1082 | Demospongiae | Tetractinellida | Tetillidae       | <i>Cinachyrella</i>     | <i>Cinachyrella</i> 381                      |                         | 0 | 1 | 0 | 0 | 0 | 0 |
| 1083 | Demospongiae | Tetractinellida | Tetillidae       | <i>Cinachyrella</i>     | <i>Cinachyrella</i> 404                      |                         | 1 | 0 | 0 | 0 | 0 | 0 |
| 1084 | Demospongiae | Tetractinellida | Tetillidae       | <i>Cinachyrella</i>     | <i>Cinachyrella</i> 415                      |                         | 1 | 0 | 0 | 0 | 0 | 0 |
| 1085 | Demospongiae | Tetractinellida | Tetillidae       | <i>Cinachyrella</i>     | <i>Cinachyrella</i> sp. Ng1                  |                         | 0 | 0 | 0 | 1 | 0 | 1 |
| 1086 | Demospongiae | Tetractinellida | Tetillidae       | <i>Cinachyrella</i>     | <i>Cinachyrella</i> sp. Ng2                  |                         | 0 | 0 | 0 | 1 | 0 | 0 |
| 1087 | Demospongiae | Tetractinellida | Tetillidae       | <i>Cinachyrella</i>     | <i>Cinachyrella</i> sp. SS1                  |                         | 0 | 0 | 0 | 1 | 0 | 0 |

|      |              |                 |                |                                |                                                     |                        |   |   |   |   |   |   |
|------|--------------|-----------------|----------------|--------------------------------|-----------------------------------------------------|------------------------|---|---|---|---|---|---|
| 1088 | Demospongiae | Tetractinellida | Tetillidae     | <i>Cinachyrella</i>            | <i>Cinachyrella</i> sp. SS5                         |                        | 0 | 0 | 0 | 1 | 0 | 0 |
| 1089 | Demospongiae | Tetractinellida | Tetillidae     | <i>Craniella</i>               | <i>Craniella</i> 402                                | (Von Lendenfeld, 1907) | 1 | 0 | 0 | 0 | 0 | 0 |
| 1090 | Demospongiae | Tetractinellida | Tetillidae     | <i>Craniella</i>               | <i>Craniella</i> sp. SS2                            |                        | 0 | 0 | 0 | 1 | 0 | 0 |
| 1091 | Demospongiae | Tetractinellida | Tetillidae     | <i>Craniella</i>               | <i>Craniella</i> sp. SS1                            |                        | 0 | 1 | 0 | 1 | 1 | 0 |
| 1092 | Demospongiae | Tetractinellida | Tetillidae     | <i>Tetilla</i>                 | <i>Tetilla</i> sp. 1                                |                        | 0 | 0 | 1 | 0 | 0 | 1 |
| 1093 | Demospongiae | Tetractinellida | Tetillidae     | Tetillidae unknown<br>genus_1  | <i>Tetillidae</i> sp. NR2                           |                        | 0 | 0 | 0 | 1 | 0 | 0 |
| 1094 | Demospongiae | Tetractinellida | Theonellidae   | <i>Discodermia</i>             | <i>Discodermia discifera</i>                        | (Von Lendenfeld, 1907) | 0 | 0 | 1 | 0 | 0 | 0 |
| 1095 | Demospongiae | Tetractinellida | Theonellidae   | <i>Discodermia</i>             | <i>Discodermia</i> cf. <i>discifera</i>             | (Von Lendenfeld, 1907) | 0 | 0 | 1 | 0 | 0 | 0 |
| 1096 | Demospongiae | Tetractinellida | Theonellidae   | <i>Discodermia</i>             | <i>Discodermia?</i> sp. 1                           |                        | 0 | 1 | 0 | 0 | 0 | 0 |
| 1097 | Demospongiae | Tetractinellida | Theonellidae   | <i>Siliquariaspongia</i>       | <i>Siliquariaspongia</i> sp.                        |                        | 0 | 0 | 0 | 1 | 0 | 0 |
| 1098 | Demospongiae | Tetractinellida | Theonellidae   | <i>Theonella</i>               | <i>Theonella</i> cf. <i>lacerata</i>                | Von Lendenfeld, 1907   | 0 | 1 | 0 | 0 | 0 | 0 |
| 1099 | Demospongiae | Tetractinellida | Theonellidae   | <i>Theonella</i>               | <i>Theonella levior</i>                             | Von Lendenfeld, 1907   | 0 | 0 | 1 | 0 | 0 | 0 |
| 1100 | Demospongiae | Tetractinellida | Theonellidae   | <i>Theonella</i>               | <i>Theonella</i> cf. <i>levior</i>                  | Von Lendenfeld, 1907   | 0 | 1 | 1 | 1 | 0 | 0 |
| 1101 | Demospongiae | Tetractinellida | Theonellidae   | <i>Theonella</i>               | <i>Theonella swinhoei</i>                           | Gray, 1868             | 1 | 1 | 1 | 0 | 0 | 0 |
| 1102 | Demospongiae | Tetractinellida | Theonellidae   | <i>Theonella</i>               | <i>Theonella</i> cf. <i>swinhoei</i>                | Gray, 1868             | 0 | 1 | 0 | 0 | 0 | 0 |
| 1103 | Demospongiae | Tetractinellida | Theonellidae   | <i>Theonella</i>               | <i>Theonella</i> sp. nov. 1                         |                        | 0 | 1 | 0 | 1 | 0 | 0 |
| 1104 | Demospongiae | Tetractinellida | Theonellidae   | <i>Theonella</i>               | <i>Theonella</i> sp. nov. 2                         |                        | 0 | 0 | 0 | 1 | 0 | 0 |
| 1105 | Demospongiae | Tetractinellida | Theonellidae   | <i>Theonella</i>               | <i>Theonella</i> sp. nov. 3                         |                        | 0 | 0 | 0 | 1 | 0 | 0 |
| 1106 | Demospongiae | Tetractinellida | Theonellidae   | <i>Theonella</i>               | <i>Theonella</i> 1780                               |                        | 0 | 1 | 0 | 0 | 0 | 0 |
| 1107 | Demospongiae | Tetractinellida | Theonellidae   | <i>Theonella</i>               | <i>Theonella</i> 4648                               |                        | 0 | 0 | 1 | 0 | 0 | 0 |
| 1108 | Demospongiae | Tetractinellida | Theonellidae   | <i>Theonella</i>               | <i>Theonella</i> sp. nov.                           |                        | 0 | 0 | 0 | 1 | 0 | 0 |
| 1109 | Demospongiae | Tetractinellida | Theonellidae   | <i>Theonella</i>               | <i>Theonella</i> spp.                               |                        | 0 | 1 | 1 | 1 | 1 | 0 |
| 1110 | Demospongiae | Trachycladida   | Trachycladidae | <i>Trachycladus</i>            | <i>Trachycladus laevispirulifer</i>                 | Carter, 1879           | 0 | 1 | 1 | 1 | 1 | 0 |
| 1111 | Demospongiae | Trachycladida   | Trachycladidae | <i>Trachycladus</i>            | <i>Trachycladus</i> cf. <i>styliifer</i>            | Dendy, 1924            | 0 | 0 | 0 | 1 | 0 | 0 |
| 1112 | Demospongiae | Verongiida      | Aplysinellidae | <i>Aplysinella</i>             | <i>Aplysinella</i> 143                              |                        | 1 | 0 | 0 | 0 | 0 | 0 |
| 1113 | Demospongiae | Verongiida      | Aplysinellidae | <i>Aplysinella</i>             | <i>Aplysinella</i> 1783                             |                        | 1 | 0 | 0 | 0 | 0 | 0 |
| 1114 | Demospongiae | Verongiida      | Aplysinellidae | <i>Porphyria</i>               | <i>Porphyria?</i> sp.                               |                        | 0 | 0 | 0 | 1 | 0 | 0 |
| 1115 | Demospongiae | Verongiida      | Aplysinellidae | <i>Suberea</i>                 | <i>Suberea ianthelliformis</i>                      | (Von Lendenfeld, 1888) | 1 | 1 | 0 | 0 | 0 | 0 |
| 1116 | Demospongiae | Verongiida      | Aplysinidae    | <i>Aplysina</i>                | <i>Aplysina</i> 589, cf. <i>Aplysina reticulata</i> | (Von Lendenfeld, 1889) | 0 | 1 | 0 | 0 | 0 | 0 |
| 1117 | Demospongiae | Verongiida      | Aplysinidae    | <i>Aplysina</i>                | <i>Aplysina</i> sp. 1                               |                        | 0 | 0 | 1 | 0 | 0 | 0 |
| 1118 | Demospongiae | Verongiida      | Aplysinidae    | <i>Aplysina</i>                | <i>Aplysina</i> sp. 2                               |                        | 0 | 0 | 1 | 0 | 0 | 0 |
| 1119 | Demospongiae | Verongiida      | Aplysinidae    | <i>Aplysina</i>                | <i>Aplysina</i> sp. 3                               |                        | 0 | 0 | 1 | 0 | 0 | 0 |
| 1120 | Demospongiae | Verongiida      | Aplysinidae    | <i>Aplysina</i>                | <i>Aplysina</i> sp. 4                               |                        | 0 | 0 | 1 | 0 | 0 | 0 |
| 1121 | Demospongiae | Verongiida      | Aplysinidae    | <i>Aplysina</i>                | <i>Aplysina</i> sp. TB1                             |                        | 0 | 0 | 0 | 1 | 0 | 0 |
| 1122 | Demospongiae | Verongiida      | Aplysinidae    | <i>Aplysina</i>                | <i>Aplysina?</i> sp. TB2                            |                        | 0 | 0 | 0 | 1 | 0 | 0 |
| 1123 | Demospongiae | Verongiida      | Aplysinidae    | Aplysinidae unknown<br>genus_1 | Aplysinidae sp. SS2                                 |                        | 0 | 0 | 0 | 1 | 0 | 0 |
| 1124 | Demospongiae | Verongiida      | Aplysinidae    | Aplysinidae unknown<br>genus_1 | Aplysinidae sp. SS3                                 |                        | 1 | 0 | 0 | 1 | 0 | 0 |

|      |                |                |                                 |                                |                                                           |                                    |   |   |   |   |   |   |
|------|----------------|----------------|---------------------------------|--------------------------------|-----------------------------------------------------------|------------------------------------|---|---|---|---|---|---|
| 1125 | Demospongiae   | Verongiida     | Aplysinidae?                    | Aplysinidae unknown<br>genus_2 | Aplysinidae? sp. SS1                                      |                                    | 0 | 0 | 0 | 1 | 1 | 0 |
| 1126 | Demospongiae   | Verongiida     | Ianthellidae                    | <i>Ianthella</i>               | <i>Ianthella basta</i>                                    | (Pallas, 1766)                     | 1 | 1 | 1 | 0 | 1 | 0 |
| 1127 | Demospongiae   | Verongiida     | Ianthellidae                    | <i>Ianthella</i>               | <i>Ianthella flabelliformis</i>                           | (Pallas, 1766)                     | 1 | 1 | 1 | 0 | 0 | 0 |
| 1128 | Demospongiae   | Verongiida     | Ianthellidae                    | <i>Ianthella</i>               | <i>Iantella</i> cf. <i>flabelliformis</i>                 | (Pallas, 1766)                     | 0 | 0 | 1 | 1 | 0 | 0 |
| 1129 | Demospongiae   | Verongiida     | Ianthellidae                    | <i>Ianthella</i>               | <i>Ianthella</i> 196, cf. <i>Iantella flabelliformis</i>  | (Pallas, 1766)                     | 1 | 0 | 0 | 0 | 0 | 0 |
| 1130 | Demospongiae   | Verongiida     | Ianthellidae                    | <i>Ianthella</i>               | <i>Ianthella labyrinthus</i>                              | Bergquist & Kelly-<br>Borges, 1995 | 1 | 0 | 1 | 0 | 0 | 0 |
| 1131 | Demospongiae   | Verongiida     | Ianthellidae                    | <i>Ianthella</i>               | <i>Ianthella</i> cf. <i>labyrinthus</i>                   | Bergquist & Kelly-<br>Borges, 1995 | 0 | 0 | 1 | 0 | 0 | 0 |
| 1132 | Demospongiae   | Verongiida     | Ianthellidae                    | <i>Ianthella</i>               | <i>Ianthella</i> cf. <i>reticulata</i>                    |                                    | 0 | 0 | 1 | 0 | 0 | 0 |
| 1133 | Demospongiae   | Verongiida     | Ianthellidae                    | <i>Ianthella</i>               | <i>Ianthella</i> sp. 1                                    |                                    | 0 | 0 | 1 | 0 | 0 | 0 |
| 1134 | Demospongiae   | Verongiida     | Ianthellidae                    | <i>Ianthella</i>               | <i>Ianthella</i> sp. QM4                                  |                                    | 0 | 1 | 0 | 0 | 1 | 0 |
| 1135 | Demospongiae   | Verongiida     | Pseudoceratinidae               | <i>Pseudoceratina</i>          | <i>Pseudoceratina durissima</i>                           | Carter, 1885                       | 0 | 1 | 0 | 0 | 0 | 0 |
| 1136 | Demospongiae   | Verongiida     | Pseudoceratinidae               | <i>Pseudoceratina</i>          | <i>Pseudoceratina</i> cf. <i>verrucosa</i>                | Bergquist, 1995                    | 0 | 0 | 1 | 0 | 0 | 0 |
| 1137 | Demospongiae   | Verongiida     | Pseudoceratinidae               | <i>Pseudoceratina</i>          | <i>Pseudoceratina</i> sp. 2                               |                                    | 0 | 0 | 1 | 0 | 0 | 0 |
| 1138 | Demospongiae   | Verongiida     | Pseudoceratinidae               | <i>Pseudoceratina</i>          | <i>Pseudoceratina</i> sp. 3                               |                                    | 0 | 1 | 0 | 0 | 0 | 0 |
| 1139 | Demospongiae   | Verongiida     | Pseudoceratinidae               | <i>Pseudoceratina</i>          | <i>Pseudoceratina</i> 190                                 |                                    | 0 | 1 | 0 | 0 | 0 | 0 |
| 1140 | Demospongiae   | Verongiida     | Pseudoceratinidae               | <i>Pseudoceratina</i>          | <i>Pseudoceratina</i> sp. Ng1                             |                                    | 0 | 1 | 0 | 1 | 0 | 0 |
| 1141 | Demospongiae   | Verongiida     | Pseudoceratinidae               | <i>Pseudoceratina</i>          | <i>Pseudoceratina</i> sp. SS1                             |                                    | 0 | 0 | 0 | 1 | 0 | 0 |
| 1142 | Demospongiae   | Verongiida     | Pseudoceratinidae               | <i>Pseudoceratina</i>          | <i>Pseudoceratina</i> sp. QM3                             |                                    | 0 | 1 | 0 | 0 | 0 | 0 |
| 1143 | Demospongiae   | Verongiida     | Verongiida unknown family_1     | Verongiida unknown genus_1     | Verongiida sp. EG1                                        |                                    | 0 | 0 | 1 | 0 | 0 | 0 |
| 1144 | Demospongiae   | Verongiida     | Verongiida unknown family_1     | Verongiida unknown genus_1     | Verongiida sp. EG2                                        |                                    | 0 | 0 | 1 | 0 | 0 | 0 |
| 1145 | Hexactinellida | Amphidiscosida | Hyalonematidae                  | <i>Hyalonema</i>               | <i>Hyalonema</i> ( <i>Cyliconema</i> ) cf. <i>apertum</i> | Schulze, 1886                      | 0 | 0 | 0 | 0 | 1 | 0 |
| 1146 | Hexactinellida | Amphidiscosida | Hyalonematidae                  | <i>Hyalonema</i>               | <i>Hyalonema</i> ( <i>Cyliconema</i> ) <i>lanceolata</i>  | Tabachnick et al., 2008            | 0 | 0 | 0 | 0 | 1 | 0 |
| 1147 | Hexactinellida | Amphidiscosida | Hyalonematidae                  | <i>Hyalonema</i>               | <i>Hyalonema</i> ( <i>Cyliconema</i> ) sp. 1              |                                    | 0 | 0 | 0 | 0 | 1 | 0 |
| 1148 | Hexactinellida | Amphidiscosida | Hyalonematidae                  | <i>Hyalonema</i>               | <i>Hyalonema</i> ( <i>Cyliconema</i> ) sp. nov. 1         |                                    | 1 | 0 | 0 | 0 | 0 | 0 |
| 1149 | Hexactinellida | Amphidiscosida | Hyalonematidae                  | <i>Hyalonema</i>               | <i>Hyalonema</i> ( <i>Hyalonema</i> ) <i>proximum</i>     | Schulze, 1904                      | 0 | 0 | 0 | 0 | 1 | 0 |
| 1150 | Hexactinellida | Amphidiscosida | Hyalonematidae                  | <i>Hyalonema</i>               | <i>Hyalonema</i> spp.                                     |                                    | 0 | 0 | 0 | 0 | 1 | 0 |
| 1151 | Hexactinellida | Amphidiscosida | Hyalonematidae                  | Lophophysema                   | <i>Lophophysema inflatum</i>                              | Schulze, 1900                      | 0 | 0 | 0 | 0 | 1 | 0 |
| 1152 | Hexactinellida | Amphidiscosida | Amphidiscosida unknown family_1 | Amphidiscosida unknown genus_1 | Amphidiscosida 1                                          |                                    | 0 | 0 | 0 | 0 | 1 | 0 |
| 1153 | Hexactinellida | Amphidiscosida | Amphidiscosida unknown family_1 | Amphidiscosida unknown genus_1 | Amphidiscosida 3 or 5                                     |                                    | 0 | 0 | 0 | 0 | 1 | 0 |
| 1154 | Hexactinellida | Amphidiscosida | Amphidiscosida unknown family_1 | Amphidiscosida unknown genus_1 | Amphidiscosida 4                                          |                                    | 0 | 0 | 0 | 0 | 1 | 0 |
| 1155 | Hexactinellida | Lyssacosida    | Euplectellidae                  | <i>Euplectella</i>             | <i>Euplectella parattractina</i>                          | Tabachnick et al., 2008            | 1 | 0 | 0 | 0 | 0 | 0 |
| 1156 | Hexactinellida | Lyssacosida    | Euplectellidae                  | <i>Euplectella</i>             | <i>Euplectella</i>                                        |                                    | 0 | 1 | 0 | 0 | 0 | 0 |

|      |                  |                   |            |                       |                                              |                      |   |   |   |   |   |   |
|------|------------------|-------------------|------------|-----------------------|----------------------------------------------|----------------------|---|---|---|---|---|---|
| 1157 | Homoscleromorpha | Homosclerophorida | Plakinidae | <i>Corticium</i>      | <i>Corticium simplex</i>                     | Von Lendenfeld, 1907 | 0 | 0 | 1 | 0 | 0 | 0 |
| 1158 | Homoscleromorpha | Homosclerophorida | Plakinidae | <i>Corticium</i>      | <i>Corticium</i> sp. SS1                     |                      | 0 | 0 | 0 | 1 | 0 | 0 |
| 1159 | Homoscleromorpha | Homosclerophorida | Plakinidae | <i>Corticium</i>      | <i>Corticium</i> sp.                         |                      | 0 | 0 | 0 | 0 | 1 | 0 |
| 1160 | Homoscleromorpha | Homosclerophorida | Plakinidae | <i>Plakina</i>        | <i>Plakina</i> sp. SS1                       |                      | 0 | 1 | 0 | 0 | 0 | 0 |
| 1161 | Homoscleromorpha | Homosclerophorida | Plakinidae | <i>Plakinastrella</i> | <i>Plakinastrella</i> cf. <i>minor</i>       |                      | 0 | 1 | 0 | 0 | 0 | 0 |
| 1162 | Homoscleromorpha | Homosclerophorida | Plakinidae | <i>Plakinastrella</i> | <i>Plakinastrella</i> sp. SS1                |                      | 0 | 0 | 0 | 1 | 0 | 1 |
| 1163 | Homoscleromorpha | Homosclerophorida | Plakinidae | <i>Plakinastrella</i> | <i>Plakinastrella</i> cf. <i>mammillaris</i> | Von Lendenfeld, 1907 | 0 | 1 | 0 | 0 | 0 | 0 |
| 1164 | Homoscleromorpha | Homosclerophorida | Plakinidae | <i>Plakortis</i>      | <i>Plakortis</i> sp.                         |                      | 0 | 0 | 0 | 1 | 0 | 0 |

**Table S2.** Collection effort contributing to the final species and OTU dataset on Pilbara sponges.

| Source Database | Expedition Id | Approximate Area of Benthos Surveyed Per Station |                |                                | North West Shelf (NWS) |                       |                | Pilbara (Offshore) (PIO) |                       |                | Pilbara (Nearshore) (PIN) |                       |                | Ningaloo (NIN) |                       |                | Northwest Province (NWP) |                       |                | Central Western Transition (CWT) |                       |                |
|-----------------|---------------|--------------------------------------------------|----------------|--------------------------------|------------------------|-----------------------|----------------|--------------------------|-----------------------|----------------|---------------------------|-----------------------|----------------|----------------|-----------------------|----------------|--------------------------|-----------------------|----------------|----------------------------------|-----------------------|----------------|
|                 |               | Mean Length (m)                                  | Mean Width (m) | Approx. Area (m <sup>2</sup> ) | Total Stations         | Stations with Sponges | Number of Days | Total Stations           | Stations with Sponges | Number of Days | Total Stations            | Stations with Sponges | Number of Days | Total Stations | Stations with Sponges | Number of Days | Total Stations           | Stations with Sponges | Number of Days | Total Stations                   | Stations with Sponges | Number of Days |
| WAM             | 1             | 891.3                                            | 2.6            | 2317.38                        |                        |                       |                | 2                        | 1                     | 2              |                           |                       |                | 11             | 5                     | 5              | 18                       | 7                     | 5              | 8                                | 1                     | 2              |
|                 | 2             | 771.1                                            | 2.7            | 2081.97                        | 10                     | 3                     | 3              | 8                        | 2                     | 2              |                           |                       |                |                |                       |                | 13                       | 1                     | 4              |                                  |                       |                |
|                 | 3             | 150                                              | 1              | 150                            |                        |                       |                | 3                        | 3                     | 1              |                           |                       |                | 44             | 44                    | 28             | 1                        | 1                     | 1              |                                  |                       |                |
|                 | 4             | 150                                              | 1              | 150                            |                        |                       |                | 2                        | 2                     | 2              |                           |                       |                | 8              | 8                     | 13             |                          |                       |                |                                  |                       |                |
|                 | 5             | 150                                              | 1              | 150                            |                        |                       |                |                          |                       |                |                           |                       |                | 40             | 27                    | 14             | 2                        | 2                     | 1              | 22                               | 13                    | 1              |
|                 | 6             | 150                                              | 1              | 150                            |                        |                       |                |                          |                       |                |                           |                       |                | 102            | 56                    | 22             |                          |                       |                |                                  |                       |                |
|                 | 7             | 772                                              | 1.2            | 926.4                          |                        |                       |                | 4                        | 1                     | 2              | 84                        | 29                    | 13             |                |                       |                |                          |                       |                |                                  |                       |                |
|                 | 8             | 25                                               | 1              | 25                             |                        |                       |                |                          |                       |                | 35                        | 29                    | 13             |                |                       |                |                          |                       |                |                                  |                       |                |
|                 | 9             | 3947.1                                           | 19.5           | 76,968.45                      | 18                     | 2                     | 4              | 24                       | 0                     | 6              | 4                         | 0                     | 4              |                |                       |                |                          |                       |                |                                  |                       |                |
|                 | 10            | 3462.8                                           | 27.5           | 95,227                         | 15                     | 5                     | 6              | 1                        | 1                     | 1              |                           |                       |                |                |                       |                |                          |                       |                |                                  |                       |                |
|                 | 11            | 3462.8                                           | 27.5           | 95,227                         |                        |                       |                | 8                        | 1                     | 6              |                           |                       |                |                |                       |                |                          |                       |                |                                  |                       |                |
|                 | 12            | 5069.9                                           | 19.5           | 98,863.05                      | 47                     | 3                     | 13             | 17                       |                       | 8              | 3                         | 0                     | 2              |                |                       |                |                          |                       |                |                                  |                       |                |
|                 | 13            | 5198.9                                           | 19.5           | 101,378.55                     | 35                     | 3                     | 11             | 18                       | 3                     | 8              |                           |                       |                |                |                       |                |                          |                       |                |                                  |                       |                |
|                 | 14            | 2326                                             | 1              | 2326                           |                        |                       |                | 8                        | 8                     | 5              |                           |                       |                | 1              | 1                     | 1              | 14                       | 7                     | 3              |                                  |                       |                |
|                 | 15            | 1653.6                                           | 0.9            | 1488.24                        |                        |                       |                |                          |                       |                |                           |                       |                | 1              | 0                     | 1              | 27                       | 11                    | 11             |                                  |                       |                |
|                 | 16            | 926                                              | 5.8            | 5370.8                         |                        |                       |                | 1                        | 0                     | 1              | 71                        | 0                     | 10             |                |                       |                |                          |                       |                |                                  |                       |                |
|                 | 17            | 926                                              | 5.8            | 5370.8                         |                        |                       |                | 3                        | 3                     | 1              | 70                        | 21                    | 8              |                |                       |                |                          |                       |                |                                  |                       |                |
|                 | 18            | 926                                              | 5.8            | 5370.8                         |                        |                       |                | 2                        | 2                     | 1              | 71                        | 57                    | 9              |                |                       |                |                          |                       |                |                                  |                       |                |
|                 | 19            | 15                                               | 1              | 15                             |                        |                       |                |                          |                       |                |                           |                       |                | 11             | 11                    | 10             |                          |                       |                |                                  |                       |                |
|                 | 20            | 15                                               | 1              | 15                             |                        |                       |                |                          |                       |                | 20                        | 20                    | 3              |                |                       |                |                          |                       |                |                                  |                       |                |
|                 | 21            | 15                                               | 1              | 15                             |                        |                       |                |                          |                       |                |                           |                       |                | 13             | 13                    | 9              |                          |                       |                |                                  |                       |                |





**Continuation of Table S2—pg S33 Legend.** Abbreviations: AIMS—Australian Institute of Marine Science, CSIRO—Commonwealth Scientific and Industrial Research Organisation, WAM—Western Australian Museum, FWA—Department of Fisheries, Western Australia, API JV Australian Premium Iron Joint Venture, SKM—Sinclair Knight Merz, ALA—Atlas of Living Australia.

| Source Database | Expedition Id Number | Major Expedition Name                                           | Collection Method        |
|-----------------|----------------------|-----------------------------------------------------------------|--------------------------|
| WAM             | 1                    | CSIRO RV "Southern Surveyor" Cruise SS1005 Nov/Dec 2005         | Sled                     |
|                 | 2                    | CSIRO RV "Southern Surveyor" Cruise SS0507 June/July 2007       | Sled                     |
|                 | 3                    | AIMS-WAM RV "Cape Ferguson" Ningaloo Survey I April/May 2006    | Sled/grab                |
|                 | 4                    | AIMS-WAM RV "Cape Ferguson" Ningaloo Survey II May 2007         | Sled/grab                |
|                 | 5                    | AIMS-WAM RV "Solander" Ningaloo Survey III Jan/Feb 2008         | Sled                     |
|                 | 6                    | AIMS-WAM RV "Solander" Ningaloo Survey IV August/September 2008 | Sled                     |
|                 | 7                    | Woodside Dampier Expedition II 1999                             | Trawl                    |
|                 | 8                    | Woodside Dampier Expedition III 1999                            | SCUBA/Snorkel/intertidal |
|                 | 9                    | CSIRO FRV "Soela" Cruise I 1979                                 | Trawl/sled               |
|                 | 10                   | CSIRO FRV "Soela" Cruise II 1982                                | Trawl/sled               |
|                 | 11                   | CSIRO FRV "Soela" Cruise III 1982                               | Trawl/sled               |
|                 | 12                   | CSIRO FRV "Soela" Cruise IV 1982                                | Trawl/sled               |
|                 | 13                   | CSIRO FRV "Soela" Cruise V 1982                                 | Trawl/sled               |
|                 | 14                   | AIMS North West Cape Survey 2001                                | Sled                     |
|                 | 15                   | AIMS North West Cape Survey II 2002                             | Sled                     |
|                 | 16                   | FWA-WAM RV "Naturaliste" Exmouth Gulf Survey I Mar 2004         | Trawl                    |
|                 | 17                   | FWA-WAM RV "Naturaliste" Exmouth Gulf Survey II Jul 2004        | Trawl                    |
|                 | 18                   | FWA-WAM RV "Naturaliste" Exmouth Gulf Survey III Nov/Dec 2004   | Trawl                    |
|                 | 19                   | Murdoch University-WAM Gnaraloo Sep, Tantibiddi Oct-Nov 2009    | SCUBA/Snorkel/intertidal |
|                 | 20                   | APIJV-WAM Anketell Sept/Oct2011                                 | Intertidal               |
|                 | 21                   | CRReefs Ningaloo 2009, May/June 2009                            | SCUBA/Snorkel            |
|                 | 22                   | Woodside Dampier Expedition I 1998                              | SCUBA/Snorkel/intertidal |
|                 | 23                   | Woodside Dampier Expedition IV 2000 (IMB Workshop XI)           | SCUBA/Snorkel/intertidal |
| ALA             | 24                   | CRReefs Ningaloo 2010                                           | SCUBA/Snorkel/intertidal |
|                 | 25                   | SKM MV "Mermaid Arrow" Mermaid Strait Survey Nov 2005           | Sled                     |
|                 | 26 *                 | Morgan & Co. Pty Ltd                                            | SCUBA                    |
|                 | 27 *                 | Low Choy, D. & NCI group                                        | SCUBA/Snorkel/intertidal |
|                 | 28 *                 | Bowman Bishaw Gorham                                            | ROV                      |
|                 | 29 *                 | Molinski, T.                                                    | SCUBA/Snorkel            |
|                 | 30 *                 | Usher, K.                                                       | SCUBA                    |
|                 | 31 *                 | Marsh, L.M.                                                     | Intertidal               |
|                 | 32 *                 | Hooper, J.N.A.                                                  | Trawl                    |
|                 | 33 *                 | FRV "Dorothea" Cruise 1962                                      | Trawl                    |
|                 | 34                   | Peter Clarkson Collection 2001                                  | SCUBA                    |
|                 | 35                   | Sea Serpent Project 2010                                        | ROV                      |
|                 | 36                   | Sea-Serpent Project 2008                                        | ROV                      |

\* Asterisks refers a single collection event for the expedition.

## 2. Results

### 2.1. Species Richness and Collection Effort

Sampling success was significantly affected by collection effort. An increase in sampling days corresponded to an increase in number of stations with sponges, and in a higher number of unique species recorded for all bioregions, except for North West Shelf (Table 3, Figure S1). However, no significant relationship between sampling days and species richness was detected for the entire study area ( $n = 6$ ,  $R^2 = 0.628$ ,  $p = 0.061$ , Figure 4a). More stations with sponges and higher species richness were found with increasing number of collection stations within the Pilbara Nearshore, Ningaloo and North West Province bioregions, but this relationship was weak or not significant for North West Shelf and Pilbara Offshore (Table 3, Figure S2). No regression analysis was conducted for Central West Transition due to the small sample size ( $n = 2$  sampling events).

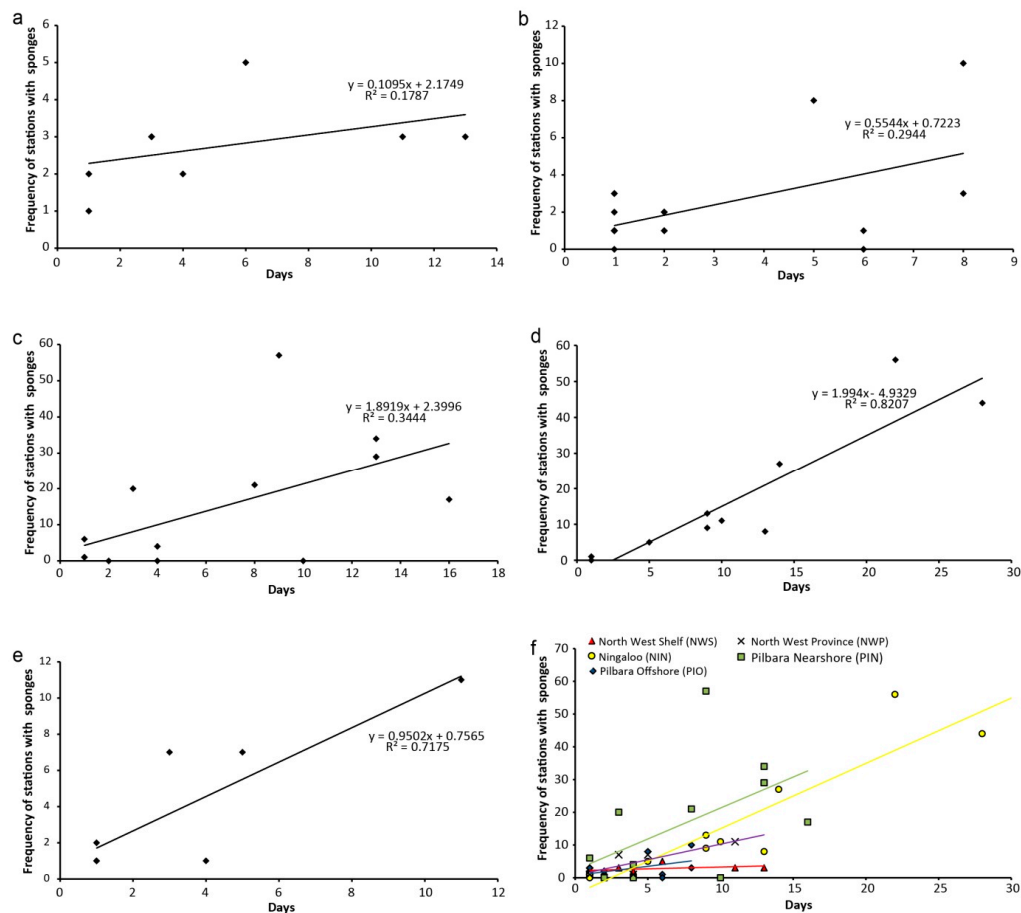

**Figure S1.** Frequency of stations with sponges against number of collection days (a) Northwest Shelf (NWS); (b) Pilbara Offshore (PIO); (c) Pilbara Nearshore (PIN); (d) Ningaloo (NIN); (e) North West Province (NWP) (f) Summary of regression compiled from graphs from all bioregions. Central West Transition (CWT) was not included in the analysis due to the small sample size ( $n = 2$ ).

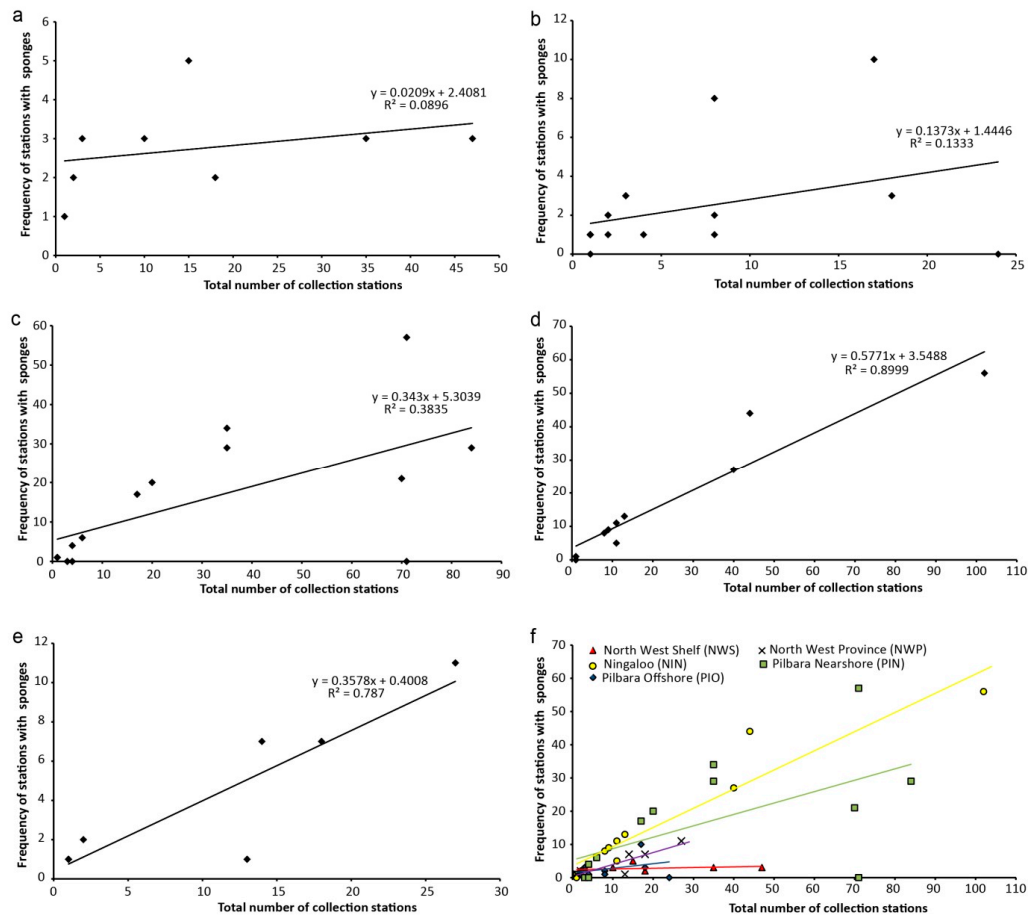

**Figure S2.** Frequency of stations with sponges against total number of collection stations for (a) Northwest Shelf (NWS); (b) Pilbara Offshore (PIO); (c) Pilbara Nearshore (PIN); (d) Ningaloo (NIN); (e) Northwest Province (NWP); (f) Summary graph for all bioregions. Central West Transition (CWT) was not included in the analysis due to the small sample size ( $n = 2$ ).

## 2.2. Community Classification Between Bioregions

Similarly, analysis at the genus level resulted in five distinct clusters, with Pilbara Nearshore grouping with neighbouring Pilbara Offshore at 60% similarity (Figure 5b and Figure 6b). Across all bioregions variable average group dissimilarity ranged from 35.1% to 83.9%, with larger dissimilarity encountered between clusters that were spatially distant, with the exception of Central West Transition, which recovered high dissimilarity to its adjacent bioregion, apparently due to the small sample size it represents (Table 4). Within each pairwise comparison between 8 to 17 genera contributed to 20% of the total between group dissimilarity, highlighting the important role of these genera in the characterisation of their communities (Table 4; Table S3).

**Table S3.** Pairwise SIMPER comparison statistics for genera contributing to average dissimilarity (Av. Diss) between bioregions. The columns “Average abundance within group” (Av. Abund Grp) represent residence of influential genera.

| Grp 1                    | Grp 2 | Av. Diss (%) | Genus                    | Av. Abund Grp 1 | Av. Abund Grp 2 | Contribution%         | Cumulative contribution% |      |      |      |
|--------------------------|-------|--------------|--------------------------|-----------------|-----------------|-----------------------|--------------------------|------|------|------|
| a                        | b     | 75.8         | <i>Petrosia</i>          | 0               | 3.16            | 3.99                  | 3.99                     |      |      |      |
|                          |       |              | <i>Sarcotragus</i>       | 0               | 2.24            | 2.82                  | 6.81                     |      |      |      |
|                          |       |              | <i>Oceanapia</i>         | 0               | 2.24            | 2.82                  | 9.63                     |      |      |      |
|                          |       |              | <i>Geodia</i>            | 0               | 2.24            | 2.82                  | 12.45                    |      |      |      |
|                          |       |              | <i>Hyalonema</i>         | 0               | 2.24            | 2.82                  | 15.27                    |      |      |      |
|                          |       |              | <i>Luffariella</i>       | 0               | 2               | 2.52                  | 17.79                    |      |      |      |
|                          |       |              | Amphidiscosida unknown   |                 |                 |                       |                          |      |      |      |
|                          |       |              | genus_1                  | 0               | 1.73            | 2.18                  | 19.98                    |      |      |      |
|                          |       |              | <i>Ectyoplasia</i>       | 0               | 1.41            | 1.78                  | 21.76                    |      |      |      |
|                          |       |              | a                        | c               | 77.73           | <i>Oceanapia</i>      | 0                        | 4.12 | 2.51 | 2.51 |
| <i>Clathria</i>          | 0     | 3.61         |                          |                 |                 | 2.2                   | 4.71                     |      |      |      |
| <i>Phakellia</i>         | 0     | 3.16         |                          |                 |                 | 1.93                  | 6.64                     |      |      |      |
| <i>Siphonodictyon</i>    | 0     | 3            |                          |                 |                 | 1.83                  | 8.47                     |      |      |      |
| <i>Sarcotragus</i>       | 0     | 2.65         |                          |                 |                 | 1.61                  | 10.09                    |      |      |      |
| <i>Petrosia</i>          | 0     | 2.65         |                          |                 |                 | 1.61                  | 11.7                     |      |      |      |
| <i>Theonella</i>         | 0     | 2.45         |                          |                 |                 | 1.49                  | 13.19                    |      |      |      |
| <i>Polymastia</i>        | 0     | 2.24         |                          |                 |                 | 1.36                  | 14.56                    |      |      |      |
| <i>Halichondria</i>      | 0     | 2.24         |                          |                 |                 | 1.36                  | 15.92                    |      |      |      |
| <i>Geodia</i>            | 0     | 2.24         |                          |                 |                 | 1.36                  | 17.28                    |      |      |      |
| <i>Xestospongia</i>      | 1     | 3.16         |                          |                 |                 | 1.32                  | 18.6                     |      |      |      |
| <i>Axinella</i>          | 1.41  | 3.46         |                          |                 |                 | 1.25                  | 19.85                    |      |      |      |
| Calcarea unknown genus_1 | 0     | 2            |                          |                 |                 | 1.22                  | 21.07                    |      |      |      |
| a                        | d     | 79.84        |                          |                 |                 | <i>Oceanapia</i>      | 0                        | 3    | 2.22 | 2.22 |
|                          |       |              |                          |                 |                 | <i>Clathria</i>       | 0                        | 3    | 2.22 | 4.44 |
|                          |       |              | <i>Mycale</i>            | 0               | 2.83            | 2.09                  | 6.53                     |      |      |      |
|                          |       |              | <i>Halichondria</i>      | 0               | 2.65            | 1.96                  | 8.49                     |      |      |      |
|                          |       |              | <i>Ircinia</i>           | 0               | 2.45            | 1.81                  | 10.3                     |      |      |      |
|                          |       |              | <i>Niphates</i>          | 0               | 2.24            | 1.65                  | 11.95                    |      |      |      |
|                          |       |              | <i>Tethya</i>            | 0               | 2.24            | 1.65                  | 13.61                    |      |      |      |
|                          |       |              | <i>Stelletta</i>         | 0               | 2.24            | 1.65                  | 15.26                    |      |      |      |
|                          |       |              | <i>Spirastrella</i>      | 0               | 2               | 1.48                  | 16.74                    |      |      |      |
|                          |       |              | <i>Spongia</i>           | 0               | 2               | 1.48                  | 18.22                    |      |      |      |
|                          |       |              | <i>Callyspongia</i>      | 0               | 2               | 1.48                  | 19.7                     |      |      |      |
|                          |       |              | <i>Amphimedon</i>        | 0               | 2               | 1.48                  | 21.18                    |      |      |      |
|                          |       |              | a                        | e               | 83.93           | <i>Oceanapia</i>      | 0                        | 3.98 | 2.05 | 2.05 |
|                          |       |              |                          |                 |                 | <i>Clathria</i>       | 0                        | 3.94 | 2.03 | 4.08 |
|                          |       |              |                          |                 |                 | <i>Callyspongia</i>   | 0                        | 3.89 | 2.01 | 6.09 |
| <i>Mycale</i>            | 0     | 3.3          |                          |                 |                 | 1.7                   | 7.8                      |      |      |      |
| <i>Haliclona</i>         | 1.41  | 4.68         |                          |                 |                 | 1.68                  | 9.48                     |      |      |      |
| <i>Amphimedon</i>        | 0     | 3.08         |                          |                 |                 | 1.59                  | 11.07                    |      |      |      |
| <i>Sarcotragus</i>       | 0     | 2.74         |                          |                 |                 | 1.41                  | 12.48                    |      |      |      |
| <i>Petrosia</i>          | 0     | 2.72         |                          |                 |                 | 1.4                   | 13.88                    |      |      |      |
| <i>Niphates</i>          | 0     | 2.62         |                          |                 |                 | 1.35                  | 15.23                    |      |      |      |
| <i>Reniochalina</i>      | 0     | 2.45         |                          |                 |                 | 1.26                  | 16.5                     |      |      |      |
| <i>Theonella</i>         | 0     | 2.44         |                          |                 |                 | 1.26                  | 17.75                    |      |      |      |
| <i>Halichondria</i>      | 0     | 2.37         |                          |                 |                 | 1.22                  | 18.97                    |      |      |      |
| <i>Dysidea</i>           | 0     | 2.34         |                          |                 |                 | 1.21                  | 20.18                    |      |      |      |
| b                        | c     | 58.89        |                          |                 |                 | <i>Phakellia</i>      | 0                        | 3.16 | 2.05 | 2.05 |
|                          |       |              |                          |                 |                 | <i>Siphonodictyon</i> | 0                        | 3    | 1.94 | 3.99 |
|                          |       |              | <i>Crella</i>            | 0               | 2.24            | 1.45                  | 5.43                     |      |      |      |
|                          |       |              | <i>Hyalonema</i>         | 2.24            | 0               | 1.45                  | 6.88                     |      |      |      |
|                          |       |              | <i>Clathria</i>          | 1.41            | 3.61            | 1.42                  | 8.29                     |      |      |      |
|                          |       |              | <i>Axinella</i>          | 1.41            | 3.46            | 1.33                  | 9.62                     |      |      |      |
|                          |       |              | Calcarea unknown genus_1 | 0               | 2               | 1.29                  | 10.91                    |      |      |      |
|                          |       |              | <i>Pararhaphoxya</i>     | 0               | 2               | 1.29                  | 12.21                    |      |      |      |
|                          |       |              | <i>Coelosphaera</i>      | 0               | 2               | 1.29                  | 13.5                     |      |      |      |

|   |   |       |                                       |      |      |      |       |
|---|---|-------|---------------------------------------|------|------|------|-------|
|   |   |       | <i>Jaspis</i>                         | 0    | 2    | 1.29 | 14.79 |
|   |   |       | <i>Ecionemia</i>                      | 0    | 2    | 1.29 | 16.09 |
|   |   |       | <i>Haliclona</i>                      | 1.41 | 3.32 | 1.23 | 17.32 |
|   |   |       | <i>Oceanapia</i>                      | 2.24 | 4.12 | 1.22 | 18.54 |
|   |   |       | <i>Xestospongia</i>                   | 1.41 | 3.16 | 1.13 | 19.67 |
|   |   |       | <i>Biemna</i>                         | 0    | 1.73 | 1.12 | 20.79 |
|   |   |       | <i>Ircinia</i>                        | 0    | 2.45 | 1.94 | 1.94  |
|   |   |       | <i>Niphates</i>                       | 0    | 2.24 | 1.77 | 3.71  |
|   |   |       | <i>Biemna</i>                         | 0    | 2    | 1.59 | 5.3   |
|   |   |       | <i>Spongia</i>                        | 0    | 2    | 1.59 | 6.88  |
|   |   |       | <i>Phakellia</i>                      | 0    | 1.73 | 1.37 | 8.26  |
|   |   |       | <i>Fasciospongia</i>                  | 0    | 1.73 | 1.37 | 9.63  |
|   |   |       | <i>Thorectandra</i>                   | 0    | 1.73 | 1.37 | 11    |
| b | d | 57.09 | <i>Amphidiscosida unknown genus_1</i> | 1.73 | 0    | 1.37 | 12.38 |
|   |   |       | <i>Halichondria</i>                   | 1    | 2.65 | 1.3  | 13.68 |
|   |   |       | <i>Clathria</i>                       | 1.41 | 3    | 1.26 | 14.94 |
|   |   |       | <i>Cinachyrella</i>                   | 1    | 2.45 | 1.15 | 16.09 |
|   |   |       | <i>Petrosia</i>                       | 3.16 | 1.73 | 1.13 | 17.22 |
|   |   |       | <i>Pericharax</i>                     | 0    | 1.41 | 1.12 | 18.34 |
|   |   |       | <i>Reniochalina</i>                   | 0    | 1.41 | 1.12 | 19.46 |
|   |   |       | <i>Higginsia</i>                      | 0    | 1.41 | 1.12 | 20.58 |
|   |   |       | <i>Haliclona</i>                      | 1.41 | 4.68 | 1.86 | 1.86  |
|   |   |       | <i>Callyspongia</i>                   | 1    | 3.89 | 1.65 | 3.51  |
|   |   |       | <i>Niphates</i>                       | 0    | 2.62 | 1.49 | 4.99  |
|   |   |       | <i>Clathria</i>                       | 1.41 | 3.94 | 1.43 | 6.43  |
|   |   |       | <i>Reniochalina</i>                   | 0    | 2.45 | 1.39 | 7.82  |
|   |   |       | <i>Higginsia</i>                      | 0    | 2.32 | 1.32 | 9.15  |
|   |   |       | <i>Ircinia</i>                        | 0    | 2.28 | 1.3  | 10.44 |
| b | e | 62.18 | <i>Axinella</i>                       | 1.41 | 3.66 | 1.28 | 11.72 |
|   |   |       | <i>Hyalonema</i>                      | 2.24 | 0    | 1.27 | 12.99 |
|   |   |       | <i>Carteriospongia</i>                | 0    | 2.22 | 1.26 | 14.25 |
|   |   |       | <i>Sphaciospongia</i>                 | 0    | 2.19 | 1.25 | 15.5  |
|   |   |       | <i>Spongia</i>                        | 0    | 2.19 | 1.25 | 16.75 |
|   |   |       | <i>Siphonodictyon</i>                 | 0    | 2.12 | 1.2  | 17.95 |
|   |   |       | <i>Amphimedon</i>                     | 1    | 3.08 | 1.18 | 19.13 |
|   |   |       | <i>Mycale</i>                         | 1.41 | 3.3  | 1.08 | 20.21 |
|   |   |       | <i>Niphates</i>                       | 0    | 2.24 | 1.57 | 1.57  |
|   |   |       | <i>Calcarea unknown genus_1</i>       | 2    | 0    | 1.4  | 2.97  |
|   |   |       | <i>Pararhaphoxya</i>                  | 2    | 0    | 1.4  | 4.38  |
|   |   |       | <i>Ecionemia</i>                      | 2    | 0    | 1.4  | 5.78  |
|   |   |       | <i>Agelas</i>                         | 1.73 | 0    | 1.22 | 7     |
|   |   |       | <i>Chondrilla</i>                     | 1.73 | 0    | 1.22 | 8.22  |
|   |   |       | <i>Fasciospongia</i>                  | 0    | 1.73 | 1.22 | 9.43  |
|   |   |       | <i>Thorectandra</i>                   | 0    | 1.73 | 1.22 | 10.65 |
| c | d | 43.51 | <i>Erylus</i>                         | 1.73 | 0    | 1.22 | 11.86 |
|   |   |       | <i>Microscleroderma</i>               | 1.73 | 0    | 1.22 | 13.08 |
|   |   |       | <i>Siphonodictyon</i>                 | 3    | 1.41 | 1.11 | 14.19 |
|   |   |       | <i>Ircinia</i>                        | 1    | 2.45 | 1.02 | 15.21 |
|   |   |       | <i>Theonella</i>                      | 2.45 | 1    | 1.02 | 16.23 |
|   |   |       | <i>Phakellia</i>                      | 3.16 | 1.73 | 1    | 17.23 |
|   |   |       | <i>Xestospongia</i>                   | 3.16 | 1.73 | 1    | 18.24 |
|   |   |       | <i>Pericharax</i>                     | 0    | 1.41 | 0.99 | 19.23 |
|   |   |       | <i>Pipestela</i>                      | 1.41 | 0    | 0.99 | 20.22 |
|   |   |       | <i>Niphates</i>                       | 0    | 2.62 | 1.92 | 1.92  |
| c | e | 35.08 | <i>Carteriospongia</i>                | 0    | 2.22 | 1.63 | 3.55  |
|   |   |       | <i>Phakellia</i>                      | 3.16 | 1.12 | 1.5  | 5.05  |

|   |   |       |                                |      |      |      |       |
|---|---|-------|--------------------------------|------|------|------|-------|
|   |   |       | <i>Pararhaphoxya</i>           | 2    | 0    | 1.47 | 6.51  |
|   |   |       | <i>Ecionemia</i>               | 2    | 0    | 1.47 | 7.98  |
|   |   |       | <i>Callyspongia</i>            | 2    | 3.89 | 1.39 | 9.37  |
|   |   |       | <i>Mycale</i>                  | 1.41 | 3.3  | 1.38 | 10.75 |
|   |   |       | <i>Hyattella</i>               | 0    | 1.73 | 1.27 | 12.02 |
|   |   |       | <i>Amphimedon</i>              | 1.41 | 3.08 | 1.22 | 13.24 |
|   |   |       | <i>Fasciospongia</i>           | 0    | 1.62 | 1.18 | 14.43 |
|   |   |       | <i>Thorecta</i>                | 2.24 | 0.71 | 1.12 | 15.55 |
|   |   |       | <i>Taonura</i>                 | 0    | 1.41 | 1.04 | 16.59 |
|   |   |       | <i>Zyzyza</i>                  | 1.41 | 0    | 1.04 | 17.62 |
|   |   |       | <i>Guitarra</i>                | 1.41 | 0    | 1.04 | 18.66 |
|   |   |       | <i>Echinoclathria</i>          | 1.41 | 0    | 1.04 | 19.7  |
|   |   |       | Aplysinidae unknown<br>genus_1 | 1.41 | 0    | 1.04 | 20.73 |
|   |   |       | <i>Haliclona</i>               | 2.24 | 4.68 | 2    | 2     |
|   |   |       | <i>Callyspongia</i>            | 2    | 3.89 | 1.55 | 3.56  |
|   |   |       | <i>Phorbas</i>                 | 0    | 1.87 | 1.53 | 5.08  |
|   |   |       | <i>Pseudoceratina</i>          | 0    | 1.83 | 1.49 | 6.58  |
|   |   |       | <i>Agelas</i>                  | 0    | 1.71 | 1.4  | 7.97  |
|   |   |       | <i>Cymbastela</i>              | 0    | 1.5  | 1.23 | 9.21  |
|   |   |       | <i>Aplysina</i>                | 0    | 1.5  | 1.23 | 10.44 |
| d | e | 35.13 | <i>Theonella</i>               | 1    | 2.44 | 1.18 | 11.62 |
|   |   |       | <i>Rhaphoxya</i>               | 0    | 1.41 | 1.16 | 12.77 |
|   |   |       | <i>Pleraplysilla</i>           | 1.41 | 0    | 1.16 | 13.93 |
|   |   |       | <i>Fascaplysinopsis</i>        | 1.41 | 0    | 1.16 | 15.09 |
|   |   |       | <i>Homaxinella</i>             | 1.41 | 0    | 1.16 | 16.25 |
|   |   |       | <i>Cinachyra</i>               | 0    | 1.41 | 1.16 | 17.41 |
|   |   |       | <i>Aplysinella</i>             | 1.41 | 0    | 1.16 | 18.57 |
|   |   |       | <i>Arenosclera</i>             | 0    | 1.37 | 1.12 | 19.69 |
|   |   |       | <i>Topsentia</i>               | 0    | 1.37 | 1.12 | 20.81 |

## References

1. Atlas of Living Australia. Available online: <http://www.ala.org.au> (accessed on 1 March 2013).
2. Hooper, J.; Ekins, M. Collation and validation of museum collection databases related to the distribution of marine sponges in Northern Australia. *Tech. Rep. Queensl. Museum* **2004**, *2*, 1–225.
3. Morrow, C.; Cardenas, P. Proposal for a revised classification of the Demospongiae (Porifera). *Front. Zool.* **2015**, *12*, doi:10.1186/s12983-015-0099-8.
4. van Soest, R.W.M.; Boury-Esnault, N.; Hooper, J.N.A.; de Voogd, N.J.; de Glasby, B.A.; Hajdu, E.; Pisera, A.; Manconi, R.; Schönberg, C.H.L.; Janussen, D.; et al. World Porifera Database. Available online: <http://www.marinespecies.org/porifera> (accessed on 13 July 2015).
